# Supplementary material for: Bibliometric trends of health economic evaluation in Sub-Saharan Africa
Source: Global Health. 2016 Aug 24;12(1):50. doi: 10.1186/s12992-016-0188-2 (PMC4997754; doi:10.1186/s12992-016-0188-2)
Supplement: Additional file 1: — Contains the variables required for generating the visual network maps. (CSV 43 kb) [file 12992_2016_188_MOESM1_ESM.csv]

IDLINK	Africa Author	Africa Author Country1	Africa Author Country1 lat	Africa Author Country1 long	Co-author	Co-author Country	Type of relationship	Co-author Country lat	Co-author Country long	Co-author Country longmas	lineweigth
1	Taraz Samandari	Botswana	-23,657	25,9089	Agizew TB	USA	4	38,8921	-77,0241	-73,5241	3
2	Taraz Samandari	Botswana	-23,657	25,9089	Bell BP	USA	4	38,8921	-77,0241	-73,5241	3
3	Taraz Samandari	Botswana	-23,657	25,9089	Bishai D	USA	4	38,8921	-77,0241	-73,5241	3
4	Taraz Samandari	Botswana	-23,657	25,9089	Chaisson LH	USA	4	38,8921	-77,0241	-73,5241	3
5	Taraz Samandari	Botswana	-23,657	25,9089	Chaves SS	USA	4	38,8921	-77,0241	-73,5241	3
6	Taraz Samandari	Botswana	-23,657	25,9089	Fiore AE	USA	4	38,8921	-77,0241	-73,5241	3
7	Taraz Samandari	Botswana	-23,657	25,9089	Gust DA	USA	4	38,8921	-77,0241	-73,5241	3
8	Taraz Samandari	Botswana	-23,657	25,9089	Jindani A	The UK	4	51,5004	-0,1262	3,3738	1
9	Taraz Samandari	Botswana	-23,657	25,9089	Kerkhoff AD	South Africa	3	-26,7463	28,1876	31,6876	1
10	Taraz Samandari	Botswana	-23,657	25,9089	Malakmadze N	USA	4	38,8921	-77,0241	-73,5241	3
11	Taraz Samandari	Botswana	-23,657	25,9089	Mdodo R	USA	4	38,8921	-77,0241	-73,5241	3
12	Taraz Samandari	Botswana	-23,657	25,9089	Mosimaneotsile B	Botswana	2	-23,657	25,9089	29,4089	1
13	Taraz Samandari	Botswana	-23,657	25,9089	Taylor AW	USA	4	38,8921	-77,0241	-73,5241	3
14	Taraz Samandari	Botswana	-23,657	25,9089	Tedla Z	Botswana	2	-23,657	25,9089	29,4089	1
15	Taraz Samandari	Botswana	-23,657	25,9089	Wasley A	USA	4	38,8921	-77,0241	-73,5241	3
16	Taraz Samandari	Botswana	-23,657	25,9089	Menzies HJ	USA	4	38,8921	-77,0241	-73,5241	3
17	Taraz Samandari	Botswana	-23,657	25,9089	Sibanda T	Botswana	2	-23,657	25,9089	29,4089	1
18	Taraz Samandari	Botswana	-23,657	25,9089	Gammino VM	USA	4	38,8921	-77,0241	-73,5241	3
19	Taraz Samandari	Botswana	-23,657	25,9089	Oeltmann JE	USA	4	38,8921	-77,0241	-73,5241	3
20	Taraz Samandari	Botswana	-23,657	25,9089	Kotloff KL	USA	4	38,8921	-77,0241	-73,5241	3
21	Taraz Samandari	Botswana	-23,657	25,9089	Brown JL.	USA	4	38,8921	-77,0241	-73,5241	3
22	Taraz Samandari	Botswana	-23,657	25,9089	Brodbeck RM	USA	4	38,8921	-77,0241	-73,5241	3
23	Junior R Matangila	Congo	-4,3369	15,3271	Doua JY	Belgium	4	50,8371	4,3676	7,8676	1
24	Junior R Matangila	Congo	-4,3369	15,3271	Lufuluabo J	Congo	2	-4,3369	15,3271	18,8271	1
25	Guillaume Jouquet	Lesotho	-29,2976	27,4854	Bygrave H	Lesotho	2	-29,2976	27,4854	30,9854	1
26	Guillaume Jouquet	Lesotho	-29,2976	27,4854	Ford N	South Africa	3	-26,7463	28,1876	31,6876	1
27	Guillaume Jouquet	Lesotho	-29,2976	27,4854	Jobanputra K	Swaziland	3	-26,3186	31,141	34,641	1
28	Guillaume Jouquet	Lesotho	-29,2976	27,4854	Parker LA	Switzerland	4	46,948	7,4481	10,9481	1
29	Guillaume Jouquet	Lesotho	-29,2976	27,4854	Ponsar F	Belgium	4	50,8371	4,3676	7,8676	1
30	Dylo F Pemba	Malawi	-13,9899	33,7703	Bandason E	Malawi	2	-13,9899	33,7703	37,2703	1
31	Dylo F Pemba	Malawi	-13,9899	33,7703	Namangale J.	Malawi	2	-13,9899	33,7703	37,2703	1
32	Paul K. Drain	Madagascar	-18,9201	47,5237	Baeten JM	USA	4	38,8921	-77,0241	-73,5241	4
33	Paul K. Drain	Madagascar	-18,9201	47,5237	Barry M.	USA	4	38,8921	-77,0241	-73,5241	4
34	Paul K. Drain	Madagascar	-18,9201	47,5237	Behforouz HL	USA	4	38,8921	-77,0241	-73,5241	4
35	Paul K. Drain	Madagascar	-18,9201	47,5237	Cherniak WA	Canada	4	45,4235	-75,6979	-72,1979	1
36	Paul K. Drain	Madagascar	-18,9201	47,5237	Cohen GM	USA	4	38,8921	-77,0241	-73,5241	4
37	Paul K. Drain	Madagascar	-18,9201	47,5237	Evert J	USA	4	38,8921	-77,0241	-73,5241	4
38	Paul K. Drain	Madagascar	-18,9201	47,5237	Gounder L	South Africa	3	-26,7463	28,1876	31,6876	1
39	Paul K. Drain	Madagascar	-18,9201	47,5237	Halperin DT	Swaziland	3	-26,3186	31,141	34,641	1
40	Paul K. Drain	Madagascar	-18,9201	47,5237	Hickey AJ	USA	4	38,8921	-77,0241	-73,5241	4
41	Paul K. Drain	Madagascar	-18,9201	47,5237	Holmes KK	USA	4	38,8921	-77,0241	-73,5241	4
42	Paul K. Drain	Madagascar	-18,9201	47,5237	Hyle EP	USA	4	38,8921	-77,0241	-73,5241	4
43	Paul K. Drain	Madagascar	-18,9201	47,5237	Kupka R	USA	4	38,8921	-77,0241	-73,5241	4
44	Paul K. Drain	Madagascar	-18,9201	47,5237	Losina E	USA	4	38,8921	-77,0241	-73,5241	4
45	Paul K. Drain	Madagascar	-18,9201	47,5237	Moosa Y	South Africa	3	-26,7463	28,1876	31,6876	1
46	Paul K. Drain	Madagascar	-18,9201	47,5237	Mosam A	South Africa	3	-26,7463	28,1876	31,6876	1
47	Paul K. Drain	Madagascar	-18,9201	47,5237	Ndeffo Mbah ML	USA	4	38,8921	-77,0241	-73,5241	4
48	Paul K. Drain	Madagascar	-18,9201	47,5237	Nelson CM	USA	4	38,8921	-77,0241	-73,5241	4
49	Paul K. Drain	Madagascar	-18,9201	47,5237	Primack A	USA	4	38,8921	-77,0241	-73,5241	4
50	Paul K. Drain	Madagascar	-18,9201	47,5237	Ralaivao JS	Madagascar	2	-18,9201	47,5237	51,0237	1
51	Paul K. Drain	Madagascar	-18,9201	47,5237	Rhatigan JJ.	USA	4	38,8921	-77,0241	-73,5241	4
52	Paul K. Drain	Madagascar	-18,9201	47,5237	Robine M	USA	4	38,8921	-77,0241	-73,5241	4
53	Paul K. Drain	Madagascar	-18,9201	47,5237	Smith JS	USA	4	38,8921	-77,0241	-73,5241	4
54	N�ria D�ez-Padrisa	Mozambique	-25,9686	32,5804	Castellanos LG	USA	4	38,8921	-77,0241	-73,5241	1
55	N�ria D�ez-Padrisa	Mozambique	-25,9686	32,5804	O'Callaghan-Gordo C	Mozambique	2	-25,9686	32,5804	36,0804	2
56	N�ria D�ez-Padrisa	Mozambique	-25,9686	32,5804	Bassat Q	Mozambique	2	-25,9686	32,5804	36,0804	2
57	N�ria D�ez-Padrisa	Mozambique	-25,9686	32,5804	Ruth Aguilar	Spain	4	40,4167	-3,7033	-0,2033	1
58	N�ria D�ez-Padrisa	Mozambique	-25,9686	32,5804	Boadas-Vaello P	Spain	4	40,4167	-3,7033	-0,2033	1
59	N�ria D�ez-Padrisa	Mozambique	-25,9686	32,5804	Soler-Mart�n C	Spain	4	40,4167	-3,7033	-0,2033	1
60	Stephen Thompson	South Africa	-26,7463	28,1876	Amin AN	USA	4	38,8921	-77,0241	-73,5241	5
61	Stephen Thompson	South Africa	-26,7463	28,1876	Brand S	the UK	4	51,5004	-0,1262	3,3738	4
62	Stephen Thompson	South Africa	-26,7463	28,1876	Chan KK	the UK	4	51,5004	-0,1262	3,3738	4
63	Stephen Thompson	South Africa	-26,7463	28,1876	Chintagumpala MM	USA	4	38,8921	-77,0241	-73,5241	5
64	Stephen Thompson	South Africa	-26,7463	28,1876	Delaney G	Australia	4	-35,282	149,1286	152,6286	1
65	Stephen Thompson	South Africa	-26,7463	28,1876	Dessi J	the UK	4	51,5004	-0,1262	3,3738	4
66	Stephen Thompson	South Africa	-26,7463	28,1876	Dybicz SB	USA	4	38,8921	-77,0241	-73,5241	5
67	Stephen Thompson	South Africa	-26,7463	28,1876	Fawcett MC	the UK	4	51,5004	-0,1262	3,3738	4
68	Stephen Thompson	South Africa	-26,7463	28,1876	Hamann W	the UK	4	51,5004	-0,1262	3,3738	4
69	Stephen Thompson	South Africa	-26,7463	28,1876	Hwang SY	Australia	4	-35,282	149,1286	152,6286	1
70	Stephen Thompson	South Africa	-26,7463	28,1876	Kaiser F	the UK	4	51,5004	-0,1262	3,3738	4
71	Stephen Thompson	South Africa	-26,7463	28,1876	Kannan H	USA	4	38,8921	-77,0241	-73,5241	5
72	Stephen Thompson	South Africa	-26,7463	28,1876	Kyle K.	USA	4	38,8921	-77,0241	-73,5241	5
73	Stephen Thompson	South Africa	-26,7463	28,1876	Lai JY	the UK	4	51,5004	-0,1262	3,3738	4
74	Stephen Thompson	South Africa	-26,7463	28,1876	Laundy D	the UK	4	51,5004	-0,1262	3,3738	4
75	Stephen Thompson	South Africa	-26,7463	28,1876	Lunn G	the UK	4	51,5004	-0,1262	3,3738	4
76	Stephen Thompson	South Africa	-26,7463	28,1876	Naidoo K	South Africa	2	-26,7463	28,1876	31,6876	6
77	Stephen Thompson	South Africa	-26,7463	28,1876	Nguyen NP	USA	4	38,8921	-77,0241	-73,5241	5
78	Stephen Thompson	South Africa	-26,7463	28,1876	Pandya N	USA	4	38,8921	-77,0241	-73,5241	5
79	Stephen Thompson	South Africa	-26,7463	28,1876	Penney G	the UK	4	51,5004	-0,1262	3,3738	4
80	Stephen Thompson	South Africa	-26,7463	28,1876	Pervez A	the UK	4	51,5004	-0,1262	3,3738	4
81	Stephen Thompson	South Africa	-26,7463	28,1876	Self AC	the UK	4	51,5004	-0,1262	3,3738	4
82	Stephen Thompson	South Africa	-26,7463	28,1876	Self CH	the UK	4	51,5004	-0,1262	3,3738	4
83	Stephen Thompson	South Africa	-26,7463	28,1876	Shanks EJ	the UK	4	51,5004	-0,1262	3,3738	4
84	Stephen Thompson	South Africa	-26,7463	28,1876	Spinks D	the UK	4	51,5004	-0,1262	3,3738	4
85	Stephen Thompson	South Africa	-26,7463	28,1876	Stewart R	the UK	4	51,5004	-0,1262	3,3738	4
86	Stephen Thompson	South Africa	-26,7463	28,1876	Torrie LS	the UK	4	51,5004	-0,1262	3,3738	4
87	Stephen Thompson	South Africa	-26,7463	28,1876	Tozawa T	the UK	4	51,5004	-0,1262	3,3738	4
88	Stephen Thompson	South Africa	-26,7463	28,1876	Urbaniak MD	the UK	4	51,5004	-0,1262	3,3738	4
89	Stephen Thompson	South Africa	-26,7463	28,1876	Wyllie S	the UK	4	51,5004	-0,1262	3,3738	4
90	Stephen Thompson	South Africa	-26,7463	28,1876	Zaky W	USA	4	38,8921	-77,0241	-73,5241	5
91	Stephen Thompson	South Africa	-26,7463	28,1876	Zhang Q	the UK	4	51,5004	-0,1262	3,3738	4
92	Charlotte M Zikusooka	South Africa	-26,7463	28,1876	Eisele TP	USA	4	38,8921	-77,0241	-73,5241	5
93	Charlotte M Zikusooka	South Africa	-26,7463	28,1876	Kyomuhang RL	Uganda	3	0,3133	32,5714	36,0714	2
94	Charlotte M Zikusooka	South Africa	-26,7463	28,1876	Luboga S	Uganda	3	0,3133	32,5714	36,0714	2
95	Charlotte M Zikusooka	South Africa	-26,7463	28,1876	McIntyre D	South Africa	2	-26,7463	28,1876	31,6876	6
96	Charlotte M Zikusooka	South Africa	-26,7463	28,1876	Orem JN	Uganda	3	0,3133	32,5714	36,0714	2
97	Rory Leisegang	South Africa	-26,7463	28,1876	Boyles TH	South Africa	2	-26,7463	28,1876	31,6876	6
98	Rory Leisegang	South Africa	-26,7463	28,1876	Cleary S	South Africa	2	-26,7463	28,1876	31,6876	6
99	Rory Leisegang	South Africa	-26,7463	28,1876	Court R	South Africa	2	-26,7463	28,1876	31,6876	6
100	Rory Leisegang	South Africa	-26,7463	28,1876	Decloedt E	South Africa	2	-26,7463	28,1876	31,6876	6
101	Rory Leisegang	South Africa	-26,7463	28,1876	Maartens G	South Africa	2	-26,7463	28,1876	31,6876	6
102	Rory Leisegang	South Africa	-26,7463	28,1876	Nachega JB	USA	4	38,8921	-77,0241	-73,5241	5
103	Meera K Chhagana	South Africa	-26,7463	28,1876	Barth-Jaeggi T	Switzerland	4	46,948	7,4481	10,9481	1
104	Meera K Chhagana	South Africa	-26,7463	28,1876	Kauchali S	South Africa	2	-26,7463	28,1876	31,6876	6
105	Meera K Chhagana	South Africa	-26,7463	28,1876	Mellins CA	USA	4	38,8921	-77,0241	-73,5241	5
106	Meera K Chhagana	South Africa	-26,7463	28,1876	Uwemedimo OT	USA	4	38,8921	-77,0241	-73,5241	5
107	Meera K Chhagana	South Africa	-26,7463	28,1876	Jeena PM	South Africa	2	-26,7463	28,1876	31,6876	6
108	Meera K Chhagana	South Africa	-26,7463	28,1876	Van den Broeck J	Norway	4	59,9138	10,7387	14,2387	1
109	Kathryn Schnippel	South Africa	-26,7463	28,1876	Cassim N	South Africa	2	-26,7463	28,1876	31,6876	6
110	Kathryn Schnippel	South Africa	-26,7463	28,1876	Larson B	USA	4	38,8921	-77,0241	-73,5241	5
111	Kathryn Schnippel	South Africa	-26,7463	28,1876	Long L	South Africa	2	-26,7463	28,1876	31,6876	6
112	Kathryn Schnippel	South Africa	-26,7463	28,1876	Meyer-Rath G	South Africa	2	-26,7463	28,1876	31,6876	6
113	Kathryn Schnippel	South Africa	-26,7463	28,1876	Rosen S	South Africa	2	-26,7463	28,1876	31,6876	6
114	Kathryn Schnippel	South Africa	-26,7463	28,1876	Siakotos AN	USA	4	38,8921	-77,0241	-73,5241	5
115	Kathryn Schnippel	South Africa	-26,7463	28,1876	Van Rie A	USA	4	38,8921	-77,0241	-73,5241	5
116	Motasim Badri	South Africa	-26,7463	28,1876	Abulkhair O	Saudi Arabia	4	24,6748	46,6977	50,1977	2
117	Motasim Badri	South Africa	-26,7463	28,1876	Al Alwan I	Saudi Arabia	4	24,6748	46,6977	50,1977	2
118	Motasim Badri	South Africa	-26,7463	28,1876	Aldrees TM	Saudi Arabia	4	24,6748	46,6977	50,1977	2
119	Motasim Badri	South Africa	-26,7463	28,1876	Bekker LG	South Africa	2	-26,7463	28,1876	31,6876	6
120	Motasim Badri	South Africa	-26,7463	28,1876	Chin A	Saudi Arabia	4	24,6748	46,6977	50,1977	2
121	Motasim Badri	South Africa	-26,7463	28,1876	Cleary S	South Africa	2	-26,7463	28,1876	31,6876	6
122	Motasim Badri	South Africa	-26,7463	28,1876	Dave JA	South Africa	2	-26,7463	28,1876	31,6876	6
123	Motasim Badri	South Africa	-26,7463	28,1876	de Villiers L	South Africa	2	-26,7463	28,1876	31,6876	6
124	Motasim Badri	South Africa	-26,7463	28,1876	Desrosiers T	USA	4	38,8921	-77,0241	-73,5241	5
125	Motasim Badri	South Africa	-26,7463	28,1876	Dheda K	South Africa	2	-26,7463	28,1876	31,6876	6
126	Motasim Badri	South Africa	-26,7463	28,1876	Heckmann JM	South Africa	2	-26,7463	28,1876	31,6876	6
127	Motasim Badri	South Africa	-26,7463	28,1876	Holmes CB	USA	4	38,8921	-77,0241	-73,5241	5
128	Motasim Badri	South Africa	-26,7463	28,1876	Kenyon C	South Africa	2	-26,7463	28,1876	31,6876	6
129	Motasim Badri	South Africa	-26,7463	28,1876	Khan A	Saudi Arabia	4	24,6748	46,6977	50,1977	2
130	Motasim Badri	South Africa	-26,7463	28,1876	Lawn SD	South Africa	2	-26,7463	28,1876	31,6876	6
131	Motasim Badri	South Africa	-26,7463	28,1876	Maartens G	South Africa	2	-26,7463	28,1876	31,6876	6
132	Motasim Badri	South Africa	-26,7463	28,1876	Maritz J	South Africa	2	-26,7463	28,1876	31,6876	6
133	Motasim Badri	South Africa	-26,7463	28,1876	Mayosi BM	South Africa	2	-26,7463	28,1876	31,6876	6
134	Motasim Badri	South Africa	-26,7463	28,1876	Mutyaba AK	South Africa	2	-26,7463	28,1876	31,6876	6
135	Motasim Badri	South Africa	-26,7463	28,1876	Ntsekhe M	South Africa	2	-26,7463	28,1876	31,6876	6
136	Motasim Badri	South Africa	-26,7463	28,1876	Ntusi NB	South Africa	2	-26,7463	28,1876	31,6876	6
137	Motasim Badri	South Africa	-26,7463	28,1876	O'Kane D	the UK	4	51,5004	-0,1262	3,3738	4
138	Motasim Badri	South Africa	-26,7463	28,1876	Orrell C	South Africa	2	-26,7463	28,1876	31,6876	6
139	Motasim Badri	South Africa	-26,7463	28,1876	Pietersen E	South Africa	2	-26,7463	28,1876	31,6876	6
140	Motasim Badri	South Africa	-26,7463	28,1876	Pooran A	the UK	4	51,5004	-0,1262	3,3738	4
141	Motasim Badri	South Africa	-26,7463	28,1876	Rooney PJ	the UK	4	51,5004	-0,1262	3,3738	4
142	Motasim Badri	South Africa	-26,7463	28,1876	Shaboodien G	South Africa	2	-26,7463	28,1876	31,6876	6
143	Motasim Badri	South Africa	-26,7463	28,1876	Shean K	South Africa	2	-26,7463	28,1876	31,6876	6
144	Motasim Badri	South Africa	-26,7463	28,1876	Sinxadi PZ	South Africa	2	-26,7463	28,1876	31,6876	6
145	Motasim Badri	South Africa	-26,7463	28,1876	Syed FF	USA	4	38,8921	-77,0241	-73,5241	5
146	Motasim Badri	South Africa	-26,7463	28,1876	Tipping B	South Africa	2	-26,7463	28,1876	31,6876	6
147	Motasim Badri	South Africa	-26,7463	28,1876	van Zyl-Smit RN	South Africa	2	-26,7463	28,1876	31,6876	6
148	Motasim Badri	South Africa	-26,7463	28,1876	Watkins DA	South Africa	2	-26,7463	28,1876	31,6876	6
149	Motasim Badri	South Africa	-26,7463	28,1876	Welschinger R	South Africa	2	-26,7463	28,1876	31,6876	6
150	Motasim Badri	South Africa	-26,7463	28,1876	Wilson D	South Africa	2	-26,7463	28,1876	31,6876	6
151	Motasim Badri	South Africa	-26,7463	28,1876	Wood R.	South Africa	2	-26,7463	28,1876	31,6876	6
152	Heidi Albert	South Africa	-26,7463	28,1876	Ademun PJ	Uganda	3	0,3133	32,5714	36,0714	2
153	Heidi Albert	South Africa	-26,7463	28,1876	Barnard M	Switzerland	4	46,948	7,4481	10,9481	1
154	Heidi Albert	South Africa	-26,7463	28,1876	Boehme CC	Switzerland	4	46,948	7,4481	10,9481	1
155	Heidi Albert	South Africa	-26,7463	28,1876	Bwanga F	Uganda	3	0,3133	32,5714	36,0714	2
156	Heidi Albert	South Africa	-26,7463	28,1876	Mole R	South Africa	2	-26,7463	28,1876	31,6876	6
157	Heidi Albert	South Africa	-26,7463	28,1876	Muzaffar R	Pakistan	4	33,6751	73,0946	76,5946	1
158	Heidi Albert	South Africa	-26,7463	28,1876	Nakiyingi L	Uganda	3	0,3133	32,5714	36,0714	2
159	Heidi Albert	South Africa	-26,7463	28,1876	Scott L	South Africa	2	-26,7463	28,1876	31,6876	6
160	Heidi Albert	South Africa	-26,7463	28,1876	Sohn H	Switzerland	4	46,948	7,4481	10,9481	1
161	Heidi Albert	South Africa	-26,7463	28,1876	Yoon C	USA	4	38,8921	-77,0241	-73,5241	5
162	Heidi Albert	South Africa	-26,7463	28,1876	Yukari Manabe	Uganda	3	0,3133	32,5714	36,0714	2
163	Amani T Mori	Tanzania	-6,167	35,7497	Ngalesoni F	Tanzania	2	-6,167	35,7497	39,2497	3
164	Amani T Mori	Tanzania	-6,167	35,7497	Kaale EA	Tanzania	2	-6,167	35,7497	39,2497	3
165	Amani T Mori	Tanzania	-6,167	35,7497	Owenya J.	Tanzania	2	-6,167	35,7497	39,2497	3
166	Amani T Mori	Tanzania	-6,167	35,7497	Robberstad B.	Norway	4	59,9138	10,7387	14,2387	1
167	Joanna RM Armstrong Schellenberg	Tanzania	-6,167	35,7497	Roca-Feltrer A	the UK	4	51,5004	-0,1262	3,3738	3
168	Joanna RM Armstrong Schellenberg	Tanzania	-6,167	35,7497	Rowe AK	USA	4	38,8921	-77,0241	-73,5241	1
169	Joanna RM Armstrong Schellenberg	Tanzania	-6,167	35,7497	Webster J	the UK	4	51,5004	-0,1262	3,3738	3
170	Joanna RM Armstrong Schellenberg	Tanzania	-6,167	35,7497	Abdulla S	Tanzania	2	-6,167	35,7497	39,2497	3
171	Joanna RM Armstrong Schellenberg	Tanzania	-6,167	35,7497	Adam T	Switzerland	4	46,948	7,4481	10,9481	2
172	Joanna RM Armstrong Schellenberg	Tanzania	-6,167	35,7497	Alonso PL	Spain	4	40,4167	-3,7033	-0,2033	2
173	Joanna RM Armstrong Schellenberg	Tanzania	-6,167	35,7497	Bryce J	Switzerland	4	46,948	7,4481	10,9481	2
174	Joanna RM Armstrong Schellenberg	Tanzania	-6,167	35,7497	de Francisco A	Gambia	3	13,45	-16,566667	-13,066667	2
175	Joanna RM Armstrong Schellenberg	Tanzania	-6,167	35,7497	Drakeley C	Tanzania	2	-6,167	35,7497	39,2497	3
176	Joanna RM Armstrong Schellenberg	Tanzania	-6,167	35,7497	Drakeley CJ	Tanzania	2	-6,167	35,7497	39,2497	3
177	Joanna RM Armstrong Schellenberg	Tanzania	-6,167	35,7497	Galindo CM	Tanzania	2	-6,167	35,7497	39,2497	3
178	Joanna RM Armstrong Schellenberg	Tanzania	-6,167	35,7497	Gouws E	Switzerland	4	46,948	7,4481	10,9481	2
179	Joanna RM Armstrong Schellenberg	Tanzania	-6,167	35,7497	Greenwood BM	Gambia	3	13,45	-16,566667	-13,066667	2
180	Joanna RM Armstrong Schellenberg	Tanzania	-6,167	35,7497	Gross K	Switzerland	4	46,948	7,4481	10,9481	2
181	Joanna RM Armstrong Schellenberg	Tanzania	-6,167	35,7497	Hanson K	the UK	4	51,5004	-0,1262	3,3738	3
182	Joanna RM Armstrong Schellenberg	Tanzania	-6,167	35,7497	Korenromp EL	Switzerland	4	46,948	7,4481	10,9481	2
183	Joanna RM Armstrong Schellenberg	Tanzania	-6,167	35,7497	Lengeler C	Switzerland	4	46,948	7,4481	10,9481	2
184	Joanna RM Armstrong Schellenberg	Tanzania	-6,167	35,7497	Lindsay SW	Gambia	3	13,45	-16,566667	-13,066667	2
185	Joanna RM Armstrong Schellenberg	Tanzania	-6,167	35,7497	Maokola W	Tanzania	2	-6,167	35,7497	39,2497	3
186	Joanna RM Armstrong Schellenberg	Tanzania	-6,167	35,7497	Marchant T	the UK	4	51,5004	-0,1262	3,3738	3
187	Joanna RM Armstrong Schellenberg	Tanzania	-6,167	35,7497	Miller JE	the UK	4	51,5004	-0,1262	3,3738	3
188	Joanna RM Armstrong Schellenberg	Tanzania	-6,167	35,7497	Mrisho M	Tanzania	2	-6,167	35,7497	39,2497	3
189	Joanna RM Armstrong Schellenberg	Tanzania	-6,167	35,7497	Nathan R	Tanzania	2	-6,167	35,7497	39,2497	3
190	Joanna RM Armstrong Schellenberg	Tanzania	-6,167	35,7497	Penfold S	the UK	4	51,5004	-0,1262	3,3738	3
191	Joanna RM Armstrong Schellenberg	Tanzania	-6,167	35,7497	Picard J	the UK	4	51,5004	-0,1262	3,3738	3
192	Joanna RM Armstrong Schellenberg	Tanzania	-6,167	35,7497	Quigley MA	the UK	4	51,5004	-0,1262	3,3738	3
193	Joanna RM Armstrong Schellenberg	Tanzania	-6,167	35,7497	Shirima K	Tanzania	2	-6,167	35,7497	39,2497	3
194	Joanna RM Armstrong Schellenberg	Tanzania	-6,167	35,7497	Victora CG	Brazil	4	-15,78333333	-47,916667	-44,416667	1
195	Joanna RM Armstrong Schellenberg	Tanzania	-6,167	35,7497	Willey BA	the UK	4	51,5004	-0,1262	3,3738	3
196	Evelyn K. Ansah	Ghana	5,5401	-0,2074	Agyepong IA	Ghana	2	5,5401	-0,2074	3,2926	3
197	Evelyn K. Ansah	Ghana	5,5401	-0,2074	Chandler CI	the Uk	4	51,5004	-0,1262	3,3738	2
198	Evelyn K. Ansah	Ghana	5,5401	-0,2074	Reynolds J	the UK	4	51,5004	-0,1262	3,3738	2
199	Evelyn K. Ansah	Ghana	5,5401	-0,2074	Kayode GA	Netherlands	4	52,3738	4,891	8,391	1
200	Evelyn K. Ansah	Ghana	5,5401	-0,2074	Powell-Jackson T	The UK	4	51,5004	-0,1262	3,3738	2
201	Evelyn K. Ansah	Ghana	5,5401	-0,2074	Epokor M	The UK	4	51,5004	-0,1262	3,3738	2
202	Evelyn K. Ansah	Ghana	5,5401	-0,2074	Narh-Bana S	Ghana	2	5,5401	-0,2074	3,2926	3
203	Evelyn K. Ansah	Ghana	5,5401	-0,2074	Whitty CJ	The UK	4	51,5004	-0,1262	3,3738	2
204	Evelyn K. Ansah	Ghana	5,5401	-0,2074	Malenga G	Malawi	3	-13,9899	33,7703	37,2703	1
205	Everisto Opondo	Kenya	-1,2762	36,7965	Khan MR	Kenya	2	-1,2762	36,7965	40,2965	4
206	Everisto Opondo	Kenya	-1,2762	36,7965	Wanzala P	Kenya	2	-1,2762	36,7965	40,2965	4
207	PM Nthumba	Kenya	-1,2762	36,7965	Axt J	USA	4	38,8921	-77,0241	-73,5241	2
208	PM Nthumba	Kenya	-1,2762	36,7965	Barasa J	Kenya	2	-1,2762	36,7965	40,2965	4
209	PM Nthumba	Kenya	-1,2762	36,7965	Carter L.	Kenya	2	-1,2762	36,7965	40,2965	4
210	PM Nthumba	Kenya	-1,2762	36,7965	Cavadas PC	Kenya	2	-1,2762	36,7965	40,2965	4
211	PM Nthumba	Kenya	-1,2762	36,7965	Dale EL	USA	4	38,8921	-77,0241	-73,5241	2
212	PM Nthumba	Kenya	-1,2762	36,7965	George S	USA	4	38,8921	-77,0241	-73,5241	2
213	PM Nthumba	Kenya	-1,2762	36,7965	Juma PI.	Kenya	2	-1,2762	36,7965	40,2965	4
214	PM Nthumba	Kenya	-1,2762	36,7965	Landin L	Spain	4	40,4167	-3,7033	-0,2033	1
215	PM Nthumba	Kenya	-1,2762	36,7965	Ngure P	Kenya	2	-1,2762	36,7965	40,2965	4
216	PM Nthumba	Kenya	-1,2762	36,7965	Stepita-Poenaru E	Kenya	2	-1,2762	36,7965	40,2965	4
217	PM Nthumba	Kenya	-1,2762	36,7965	Widmer AF	Switzerland	4	46,948	7,4481	10,9481	1
218	PM Nthumba	Kenya	-1,2762	36,7965	Wood JH	USA	4	38,8921	-77,0241	-73,5241	2
219	Dejan Zurovac	Kenya	-1,2762	36,7965	Abdelgader TM	Kenya	2	-1,2762	36,7965	40,2965	4
220	Dejan Zurovac	Kenya	-1,2762	36,7965	Amin AA	Kenya	2	-1,2762	36,7965	40,2965	4
221	Dejan Zurovac	Kenya	-1,2762	36,7965	Gething PW	the UK	4	51,5004	-0,1262	3,3738	1
222	Dejan Zurovac	Kenya	-1,2762	36,7965	Githinji S	Kenya	2	-1,2762	36,7965	40,2965	4
223	Dejan Zurovac	Kenya	-1,2762	36,7965	Hamer DH	USA	4	38,8921	-77,0241	-73,5241	2
224	Dejan Zurovac	Kenya	-1,2762	36,7965	Irimu GW	Kenya	2	-1,2762	36,7965	40,2965	4
225	Dejan Zurovac	Kenya	-1,2762	36,7965	Jones CO	Kenya	2	-1,2762	36,7965	40,2965	4
226	Dejan Zurovac	Kenya	-1,2762	36,7965	Juma E	Kenya	2	-1,2762	36,7965	40,2965	4
227	Dejan Zurovac	Kenya	-1,2762	36,7965	Kangwana BB	Kenya	2	-1,2762	36,7965	40,2965	4
228	Dejan Zurovac	Kenya	-1,2762	36,7965	Larson BA	USA	4	38,8921	-77,0241	-73,5241	2
229	Dejan Zurovac	Kenya	-1,2762	36,7965	Lawford H	France	4	48,8567	2,351	5,851	1
230	Dejan Zurovac	Kenya	-1,2762	36,7965	Mudhune SA	Kenya	2	-1,2762	36,7965	40,2965	4
231	Dejan Zurovac	Kenya	-1,2762	36,7965	Nankabirwa J	Uganda	3	0,3133	32,5714	36,0714	1
232	Dejan Zurovac	Kenya	-1,2762	36,7965	Ndhlovu M	Zambia	3	15,4145	28,2809	31,7809	1
233	Dejan Zurovac	Kenya	-1,2762	36,7965	Noor AM	Kenya	2	-1,2762	36,7965	40,2965	4
234	Dejan Zurovac	Kenya	-1,2762	36,7965	Nyandigisi A	Kenya	2	-1,2762	36,7965	40,2965	4
235	Dejan Zurovac	Kenya	-1,2762	36,7965	Otieno G	Kenya	2	-1,2762	36,7965	40,2965	4
236	Dejan Zurovac	Kenya	-1,2762	36,7965	Skarbinski J	USA	4	38,8921	-77,0241	-73,5241	2
237	Dejan Zurovac	Kenya	-1,2762	36,7965	Sudoi RK	Kenya	2	-1,2762	36,7965	40,2965	4
238	Dejan Zurovac	Kenya	-1,2762	36,7965	Talisuna AO	Kenya	2	-1,2762	36,7965	40,2965	4
239	Dejan Zurovac	Kenya	-1,2762	36,7965	Tibenderana JK	Uganda	3	0,3133	32,5714	36,0714	1
240	Dejan Zurovac	Kenya	-1,2762	36,7965	Wasunna B	Kenya	2	-1,2762	36,7965	40,2965	4
241	Angela Oloo Akumu	Kenya	-1,2762	36,7965	English M	Kenya	2	-1,2762	36,7965	40,2965	4
242	Angela Oloo Akumu	Kenya	-1,2762	36,7965	Philip Ayieko	Kenya	2	-1,2762	36,7965	40,2965	4
243	Lucy W Kivuti-Bitok	Kenya	-1,2762	36,7965	Kipturgo MK	Kenya	2	-1,2762	36,7965	40,2965	4
244	Lucy W Kivuti-Bitok	Kenya	-1,2762	36,7965	McDonnell G	Kenya	2	-1,2762	36,7965	40,2965	4
245	Lucy W Kivuti-Bitok	Kenya	-1,2762	36,7965	Pokhariyal GP	Kenya	2	-1,2762	36,7965	40,2965	4
246	Obinna Ikechukwu Ekwunife	Nigeria	9,058	7,4891	Okoye MO	Nigeria	2	9,058	7,4891	10,9891	6
247	Obinna Ikechukwu Ekwunife	Nigeria	9,058	7,4891	Okafor CE	Nigeria	2	9,058	7,4891	10,9891	6
248	Obinna Ikechukwu Ekwunife	Nigeria	9,058	7,4891	Oreh C	Nigeria	2	9,058	7,4891	10,9891	6
249	Obinna Ikechukwu Ekwunife	Nigeria	9,058	7,4891	Ubaka CM	Nigeria	2	9,058	7,4891	10,9891	6
250	Obinna Ikechukwu Ekwunife	Nigeria	9,058	7,4891	Aguwa CN	Nigeria	2	9,058	7,4891	10,9891	6
251	Obinna Ikechukwu Ekwunife	Nigeria	9,058	7,4891	Ukwe CV	Nigeria	2	9,058	7,4891	10,9891	6
252	Obinna Ikechukwu Ekwunife	Nigeria	9,058	7,4891	Ezenduka CC	Nigeria	2	9,058	7,4891	10,9891	6
253	Obinna Ikechukwu Ekwunife	Nigeria	9,058	7,4891	Njilele AC	Nigeria	2	9,058	7,4891	10,9891	6
254	Obinna Ikechukwu Ekwunife	Nigeria	9,058	7,4891	Igboeli NU	Nigeria	2	9,058	7,4891	10,9891	6
255	Obinna Ikechukwu Ekwunife	Nigeria	9,058	7,4891	Udeogaranya PO	Nigeria	2	9,058	7,4891	10,9891	6
256	Obinna Ikechukwu Ekwunife	Nigeria	9,058	7,4891	Okonta JM	Nigeria	2	9,058	7,4891	10,9891	6
257	Charles Ezenduka	Nigeria	9,058	7,4891	Ichoku H	Nigeria	2	9,058	7,4891	10,9891	6
258	Charles Ezenduka	Nigeria	9,058	7,4891	Ogbonna BO	Nigeria	2	9,058	7,4891	10,9891	6
259	Charles Ezenduka	Nigeria	9,058	7,4891	Okafor CE	Nigeria	2	9,058	7,4891	10,9891	6
260	Charles Ezenduka	Nigeria	9,058	7,4891	Okonta MJ	Nigeria	2	9,058	7,4891	10,9891	6
261	Charles Ezenduka	Nigeria	9,058	7,4891	Post E	Netherlands	4	52,3738	4,891	8,391	1
262	Ismail Ayinla Suleiman	Nigeria	9,058	7,4891	Amogu EO	Nigeria	2	9,058	7,4891	10,9891	6
263	Ismail Ayinla Suleiman	Nigeria	9,058	7,4891	Bamiro BS	Nigeria	2	9,058	7,4891	10,9891	6
264	Rosemary Ogu	Nigeria	9,058	7,4891	Enyindah C	Nigeria	2	9,058	7,4891	10,9891	6
265	Rosemary Ogu	Nigeria	9,058	7,4891	Jamabo RS	Nigeria	2	9,058	7,4891	10,9891	6
266	Rosemary Ogu	Nigeria	9,058	7,4891	Okonofua F.	Nigeria	2	9,058	7,4891	10,9891	6
267	Rosemary Ogu	Nigeria	9,058	7,4891	Oseji M	Nigeria	2	9,058	7,4891	10,9891	6
268	Benjamin Uzochukwu	Nigeria	9,058	7,4891	Akpala CO	Nigeria	2	9,058	7,4891	10,9891	6
269	Benjamin Uzochukwu	Nigeria	9,058	7,4891	Chiegboka LO	Nigeria	2	9,058	7,4891	10,9891	6
270	Benjamin Uzochukwu	Nigeria	9,058	7,4891	Dike N	Nigeria	2	9,058	7,4891	10,9891	6
271	Benjamin Uzochukwu	Nigeria	9,058	7,4891	Ezeoke OP	Nigeria	2	9,058	7,4891	10,9891	6
272	Benjamin Uzochukwu	Nigeria	9,058	7,4891	L� G	the UK	4	51,5004	-0,1262	3,3738	4
273	Benjamin Uzochukwu	Nigeria	9,058	7,4891	Mangham LJ	the UK	4	51,5004	-0,1262	3,3738	4
274	Benjamin Uzochukwu	Nigeria	9,058	7,4891	Mbachu CO	Nigeria	2	9,058	7,4891	10,9891	6
275	Benjamin Uzochukwu	Nigeria	9,058	7,4891	Mirzoev T	the UK	4	51,5004	-0,1262	3,3738	4
276	Benjamin Uzochukwu	Nigeria	9,058	7,4891	Obikeze EN	Nigeria	2	9,058	7,4891	10,9891	6
277	Benjamin Uzochukwu	Nigeria	9,058	7,4891	Okeke TA	Nigeria	2	9,058	7,4891	10,9891	6
278	Benjamin Uzochukwu	Nigeria	9,058	7,4891	Onoka CA	Nigeria	2	9,058	7,4891	10,9891	6
279	Benjamin Uzochukwu	Nigeria	9,058	7,4891	Onwujekwe E	Nigeria	2	9,058	7,4891	10,9891	6
280	Benjamin Uzochukwu	Nigeria	9,058	7,4891	Onwujekwe EO	Nigeria	2	9,058	7,4891	10,9891	6
281	Benjamin Uzochukwu	Nigeria	9,058	7,4891	Onwujekwe O	Nigeria	2	9,058	7,4891	10,9891	6
282	Benjamin Uzochukwu	Nigeria	9,058	7,4891	Onwujekwe OC	Nigeria	2	9,058	7,4891	10,9891	6
283	Benjamin Uzochukwu	Nigeria	9,058	7,4891	Onwujekwe OE	Nigeria	2	9,058	7,4891	10,9891	6
284	Benjamin Uzochukwu	Nigeria	9,058	7,4891	Ughasoro MD	Nigeria	2	9,058	7,4891	10,9891	6
285	Benjamin Uzochukwu	Nigeria	9,058	7,4891	Uguru N	Nigeria	2	9,058	7,4891	10,9891	6
286	Benjamin Uzochukwu	Nigeria	9,058	7,4891	Uguru NP	Nigeria	2	9,058	7,4891	10,9891	6
287	Benjamin Uzochukwu	Nigeria	9,058	7,4891	Ugwu EO	Nigeria	2	9,058	7,4891	10,9891	6
288	Benjamin Uzochukwu	Nigeria	9,058	7,4891	Wiseman V	the UK	4	51,5004	-0,1262	3,3738	4
289	Bolajoko O. Olusanya	Nigeria	9,058	7,4891	Afe AJ	Nigeria	2	9,058	7,4891	10,9891	6
290	Bolajoko O. Olusanya	Nigeria	9,058	7,4891	Akinyemi OO.	Nigeria	2	9,058	7,4891	10,9891	6
291	Bolajoko O. Olusanya	Nigeria	9,058	7,4891	Bamigboye BA	Nigeria	2	9,058	7,4891	10,9891	6
292	Bolajoko O. Olusanya	Nigeria	9,058	7,4891	Bhutani VK	USA	4	38,8921	-77,0241	-73,5241	3
293	Bolajoko O. Olusanya	Nigeria	9,058	7,4891	Cline BK	USA	4	38,8921	-77,0241	-73,5241	3
294	Bolajoko O. Olusanya	Nigeria	9,058	7,4891	Ebuehi OM.	Nigeria	2	9,058	7,4891	10,9891	6
295	Bolajoko O. Olusanya	Nigeria	9,058	7,4891	Eletu OB	Nigeria	2	9,058	7,4891	10,9891	6
296	Bolajoko O. Olusanya	Nigeria	9,058	7,4891	Emokpae AA	Nigeria	2	9,058	7,4891	10,9891	6
297	Bolajoko O. Olusanya	Nigeria	9,058	7,4891	Ezeaka CV	Nigeria	2	9,058	7,4891	10,9891	6
298	Bolajoko O. Olusanya	Nigeria	9,058	7,4891	Imam ZO	Nigeria	2	9,058	7,4891	10,9891	6
299	Bolajoko O. Olusanya	Nigeria	9,058	7,4891	Inem VA	Nigeria	2	9,058	7,4891	10,9891	6
300	Bolajoko O. Olusanya	Nigeria	9,058	7,4891	Kassebaum NJ	USA	4	38,8921	-77,0241	-73,5241	3
301	Bolajoko O. Olusanya	Nigeria	9,058	7,4891	Luxon LM	the UK	4	51,5004	-0,1262	3,3738	4
302	Bolajoko O. Olusanya	Nigeria	9,058	7,4891	Murray CJ	USA	4	38,8921	-77,0241	-73,5241	3
303	Bolajoko O. Olusanya	Nigeria	9,058	7,4891	Neumann KJ	Germany	4	52,5235	13,4115	16,9115	1
304	Bolajoko O. Olusanya	Nigeria	9,058	7,4891	Newton VE.	the UK	4	51,5004	-0,1262	3,3738	4
305	Bolajoko O. Olusanya	Nigeria	9,058	7,4891	Ofovwe GE.	Benin	3	6,483333333	2,616667	6,116667	1
306	Bolajoko O. Olusanya	Nigeria	9,058	7,4891	Ogunlesi TA	Nigeria	2	9,058	7,4891	10,9891	6
307	Bolajoko O. Olusanya	Nigeria	9,058	7,4891	Okolo AA.	Nigeria	2	9,058	7,4891	10,9891	6
308	Bolajoko O. Olusanya	Nigeria	9,058	7,4891	Renner JK.	Nigeria	2	9,058	7,4891	10,9891	6
309	Bolajoko O. Olusanya	Nigeria	9,058	7,4891	Roberts AA.	Nigeria	2	9,058	7,4891	10,9891	6
310	Bolajoko O. Olusanya	Nigeria	9,058	7,4891	Ruben RJ	USA	4	38,8921	-77,0241	-73,5241	3
311	Bolajoko O. Olusanya	Nigeria	9,058	7,4891	Slusher TM.	USA	4	38,8921	-77,0241	-73,5241	3
312	Bolajoko O. Olusanya	Nigeria	9,058	7,4891	Solanke OA.	Nigeria	2	9,058	7,4891	10,9891	6
313	Bolajoko O. Olusanya	Nigeria	9,058	7,4891	Somefun AO.	Nigeria	2	9,058	7,4891	10,9891	6
314	Bolajoko O. Olusanya	Nigeria	9,058	7,4891	Swanepoel de W	South Africa	3	-26,7463	28,1876	31,6876	1
315	Bolajoko O. Olusanya	Nigeria	9,058	7,4891	Vreman HJ	USA	4	38,8921	-77,0241	-73,5241	3
316	Bolajoko O. Olusanya	Nigeria	9,058	7,4891	Wirz SL	the UK	4	51,5004	-0,1262	3,3738	4
317	Asfaw Demissie Bikilla	Ethiopia	9,0084	38,7575	Jerene D	Norway	4	59,9138	10,7387	14,2387	1
318	Yibeltal A Kifle	Ethiopia	9,0084	38,7575	Nigatu TH.	Ethiopia	2	9,0084	38,7575	42,2575	1
319	Hailemariam Lemma	Ethiopia	9,0084	38,7575	Belayneh M	Ethiopia	2	9,0084	38,7575	42,2575	1
320	Hailemariam Lemma	Ethiopia	9,0084	38,7575	Byass P	Sweden	4	59,3328	18,0645	21,5645	2
321	Hailemariam Lemma	Ethiopia	9,0084	38,7575	L�fgren C	Sweden	4	59,3328	18,0645	21,5645	2
322	Hailemariam Lemma	Ethiopia	9,0084	38,7575	Paulander J	Sweden	4	59,3328	18,0645	21,5645	2
323	Hailemariam Lemma	Ethiopia	9,0084	38,7575	San Sebastian M	Sweden	4	59,3328	18,0645	21,5645	2
324	Hailemariam Lemma	Ethiopia	9,0084	38,7575	Tsegay Y	Ethiopia	2	9,0084	38,7575	42,2575	1
325	Asayehegn Tekeste	Ethiopia	9,0084	38,7575	Wondafrash M	Ethiopia	2	9,0084	38,7575	42,2575	1
326	Nazarius M Tumwesigye	Uganda	0,3133	32,5714	Albert LM	USA	4	38,8921	-77,0241	-73,5241	3
327	Nazarius M Tumwesigye	Uganda	0,3133	32,5714	Atuyambe L	Uganda	2	0,3133	32,5714	36,0714	5
328	Nazarius M Tumwesigye	Uganda	0,3133	32,5714	Byamugisha JK	Uganda	2	0,3133	32,5714	36,0714	5
329	Nazarius M Tumwesigye	Uganda	0,3133	32,5714	Ediau M	Uganda	2	0,3133	32,5714	36,0714	5
330	Nazarius M Tumwesigye	Uganda	0,3133	32,5714	Kibira SP	Uganda	2	0,3133	32,5714	36,0714	5
331	Nazarius M Tumwesigye	Uganda	0,3133	32,5714	Kiondo P	Uganda	2	0,3133	32,5714	36,0714	5
332	Nazarius M Tumwesigye	Uganda	0,3133	32,5714	Lubega M	Uganda	2	0,3133	32,5714	36,0714	5
333	Nazarius M Tumwesigye	Uganda	0,3133	32,5714	Muhamadi L	Uganda	2	0,3133	32,5714	36,0714	5
334	Nazarius M Tumwesigye	Uganda	0,3133	32,5714	Nalwadda G	Uganda	2	0,3133	32,5714	36,0714	5
335	Nazarius M Tumwesigye	Uganda	0,3133	32,5714	Room R	Australia	4	-35,282	149,1286	152,6286	1
336	Nazarius M Tumwesigye	Uganda	0,3133	32,5714	Tweheyo R	Uganda	2	0,3133	32,5714	36,0714	5
337	Nazarius M Tumwesigye	Uganda	0,3133	32,5714	Wabwire-Mangen F	Uganda	2	0,3133	32,5714	36,0714	5
338	Nazarius M Tumwesigye	Uganda	0,3133	32,5714	Wanyenze RK	Uganda	2	0,3133	32,5714	36,0714	5
339	Nazarius M Tumwesigye	Uganda	0,3133	32,5714	Jacinto A	Uganda	2	0,3133	32,5714	36,0714	5
340	Nazarius M Tumwesigye	Uganda	0,3133	32,5714	Barageine JK	Uganda	2	0,3133	32,5714	36,0714	5
341	Nazarius M Tumwesigye	Uganda	0,3133	32,5714	Gilmore B	Ireland	4	53,3441	-6,2675	-2,7675	1
342	Nazarius M Tumwesigye	Uganda	0,3133	32,5714	Ingham R	the UK	4	51,5004	-0,1262	3,3738	2
343	Nazarius M Tumwesigye	Uganda	0,3133	32,5714	Kyomuhendo GB	Uganda	2	0,3133	32,5714	36,0714	5
344	Nazarius M Tumwesigye	Uganda	0,3133	32,5714	Ogwang S	Uganda	2	0,3133	32,5714	36,0714	5
345	Nazarius M Tumwesigye	Uganda	0,3133	32,5714	Hull T	Australia	4	-35,282	149,1286	152,6286	1
346	Nazarius M Tumwesigye	Uganda	0,3133	32,5714	Drabble LA	USA	4	38,8921	-77,0241	-73,5241	3
347	Nazarius M Tumwesigye	Uganda	0,3133	32,5714	Nabbuye-Sekandi J	Uganda	2	0,3133	32,5714	36,0714	5
348	Nazarius M Tumwesigye	Uganda	0,3133	32,5714	Kasirye R	Uganda	2	0,3133	32,5714	36,0714	5
349	Nazarius M Tumwesigye	Uganda	0,3133	32,5714	Matovu A	Uganda	2	0,3133	32,5714	36,0714	5
350	Nazarius M Tumwesigye	Uganda	0,3133	32,5714	Ijsselmuiden CB	Switzerland	4	46,948	7,4481	10,9481	1
351	Kevin Duffy	Uganda	0,3133	32,5714	Galukande M	Uganda	2	0,3133	32,5714	36,0714	5
352	Kevin Duffy	Uganda	0,3133	32,5714	Howell K	USA	4	38,8921	-77,0241	-73,5241	3
353	Kevin Duffy	Uganda	0,3133	32,5714	Nassr Nassr	Germany	4	52,5235	13,4115	16,9115	1
354	Kevin Duffy	Uganda	0,3133	32,5714	Pappalardi M	USA	4	38,8921	-77,0241	-73,5241	3
355	Kevin Duffy	Uganda	0,3133	32,5714	Rahmouni HW	USA	4	38,8921	-77,0241	-73,5241	3
356	Kevin Duffy	Uganda	0,3133	32,5714	Spierer DK	USA	4	38,8921	-77,0241	-73,5241	3
357	Kevin Duffy	Uganda	0,3133	32,5714	Tendulkar SA	the UK	4	51,5004	-0,1262	3,3738	2
358	Jan H Kolaczinski	Uganda	0,3133	32,5714	Ashton RA	Uganda	2	0,3133	32,5714	36,0714	5
359	Jan H Kolaczinski	Uganda	0,3133	32,5714	Brooker S	Kenya	3	-1,2762	36,7965	40,2965	1
360	Jan H Kolaczinski	Uganda	0,3133	32,5714	Clements AC	Australia	4	-35,282	149,1286	152,6286	1
361	Jan H Kolaczinski	Uganda	0,3133	32,5714	Edwards T	the UK	4	51,5004	-0,1262	3,3738	2
362	Jan H Kolaczinski	Uganda	0,3133	32,5714	Finn TP	South Sudan	3	4,85	31,616667	35,116667	2
363	Jan H Kolaczinski	Uganda	0,3133	32,5714	Hanson K	the UK	4	51,5004	-0,1262	3,3738	2
364	Jan H Kolaczinski	Uganda	0,3133	32,5714	Hope A	South Sudan	3	4,85	31,616667	35,116667	2
365	Jan H Kolaczinski	Uganda	0,3133	32,5714	Kabatereine NB	Uganda	2	0,3133	32,5714	36,0714	5
366	Jan H Kolaczinski	Uganda	0,3133	32,5714	Kolaczinski K	Uganda	2	0,3133	32,5714	36,0714	5
367	Jan H Kolaczinski	Uganda	0,3133	32,5714	Mueller YK	France	4	48,8567	2,351	5,851	1
368	Jan H Kolaczinski	Uganda	0,3133	32,5714	Muhammad N	Pakistan	4	33,6751	73,0946	76,5946	1
369	Jan H Kolaczinski	Uganda	0,3133	32,5714	Ojok N	Uganda	2	0,3133	32,5714	36,0714	5
370	Jan H Kolaczinski	Uganda	0,3133	32,5714	Reithinger R	the UK	4	51,5004	-0,1262	3,3738	2
371	Jan H Kolaczinski	Uganda	0,3133	32,5714	Robinson E	South Sudan	3	4,85	31,616667	35,116667	2
372	Jan H Kolaczinski	Uganda	0,3133	32,5714	Sturrock HJ	South Sudan	3	4,85	31,616667	35,116667	2
373	Jan H Kolaczinski	Uganda	0,3133	32,5714	Tadesse Z	Ethiopia	3	9,0084	38,7575	42,2575	1
374	Jan H Kolaczinski	Uganda	0,3133	32,5714	Worku DT	Uganda	2	0,3133	32,5714	36,0714	5
375	Anthony K. Mbonye	Uganda	0,3133	32,5714	Asiimwe JB	Uganda	2	0,3133	32,5714	36,0714	5
376	Anthony K. Mbonye	Uganda	0,3133	32,5714	Banura C	Uganda	2	0,3133	32,5714	36,0714	5
377	Anthony K. Mbonye	Uganda	0,3133	32,5714	Birungi J	Uganda	2	0,3133	32,5714	36,0714	5
378	Anthony K. Mbonye	Uganda	0,3133	32,5714	Burke HM	USA	4	38,8921	-77,0241	-73,5241	3
379	Anthony K. Mbonye	Uganda	0,3133	32,5714	Bygbjerg I	Denmark	4	55,66666667	12,583333	16,083333	2
380	Anthony K. Mbonye	Uganda	0,3133	32,5714	Chandler CI	the UK	4	51,5004	-0,1262	3,3738	2
381	Anthony K. Mbonye	Uganda	0,3133	32,5714	Colenbrander S	Uganda	2	0,3133	32,5714	36,0714	5
382	Anthony K. Mbonye	Uganda	0,3133	32,5714	Dowell SF	USA	4	38,8921	-77,0241	-73,5241	3
383	Anthony K. Mbonye	Uganda	0,3133	32,5714	Lal S	the UK	4	51,5004	-0,1262	3,3738	2
384	Anthony K. Mbonye	Uganda	0,3133	32,5714	Magnussen P	Denmark	4	55,66666667	12,583333	16,083333	2
385	Anthony K. Mbonye	Uganda	0,3133	32,5714	Nalwadda Kayemba C	Uganda	2	0,3133	32,5714	36,0714	5
386	Anthony K. Mbonye	Uganda	0,3133	32,5714	Ndyomugyenyi R	Uganda	2	0,3133	32,5714	36,0714	5
387	Anthony K. Mbonye	Uganda	0,3133	32,5714	Neema S	Uganda	2	0,3133	32,5714	36,0714	5
388	Anthony K. Mbonye	Uganda	0,3133	32,5714	Sentongo M	Uganda	2	0,3133	32,5714	36,0714	5
389	Anthony K. Mbonye	Uganda	0,3133	32,5714	Stanback J	USA	4	38,8921	-77,0241	-73,5241	3
390	Anthony K. Mbonye	Uganda	0,3133	32,5714	Taylor BJ	Canada	4	45,4235	-75,6979	-72,1979	1
391	Anthony K. Mbonye	Uganda	0,3133	32,5714	Wamala JF	Uganda	2	0,3133	32,5714	36,0714	5
392	Anthony K. Mbonye	Uganda	0,3133	32,5714	Wamono F.	Uganda	2	0,3133	32,5714	36,0714	5
393	Anthony K. Mbonye	Uganda	0,3133	32,5714	Yanow S	Canada	4	45,4235	-75,6979	-72,1979	1
394	Kingsley Osei-Kwakye	Ghana	5,5401	-0,2074	Agnandji ST	Gabon	3	0,383333333	9,45	12,95	1
395	Kingsley Osei-Kwakye	Ghana	5,5401	-0,2074	Ansong D	Ghana	2	5,5401	-0,2074	3,2926	3
396	Kingsley Osei-Kwakye	Ghana	5,5401	-0,2074	Asante KP	Ghana	2	5,5401	-0,2074	3,2926	3
397	Kingsley Osei-Kwakye	Ghana	5,5401	-0,2074	Dosoo DK	Ghana	2	5,5401	-0,2074	3,2926	3
398	Kingsley Osei-Kwakye	Ghana	5,5401	-0,2074	Evans JA	Ghana	2	5,5401	-0,2074	3,2926	3
399	Kingsley Osei-Kwakye	Ghana	5,5401	-0,2074	Goldman N	The UK	4	51,5004	-0,1262	3,3738	2
400	Kingsley Osei-Kwakye	Ghana	5,5401	-0,2074	Owusu-Agyei S	Ghana	2	5,5401	-0,2074	3,2926	3
401	Kingsley Osei-Kwakye	Ghana	5,5401	-0,2074	Timmann C	Germany	4	52,5235	13,4115	16,9115	1
402	Justice Nonvignon	Ghana	5,5401	-0,2074	Abbey M	Ghana	2	5,5401	-0,2074	3,2926	3
403	Justice Nonvignon	Ghana	5,5401	-0,2074	Addo R	Ghana	2	5,5401	-0,2074	3,2926	3
404	Justice Nonvignon	Ghana	5,5401	-0,2074	Agyepong IA	Ghana	2	5,5401	-0,2074	3,2926	3
405	Justice Nonvignon	Ghana	5,5401	-0,2074	Aikins M	Ghana	2	5,5401	-0,2074	3,2926	3
406	Justice Nonvignon	Ghana	5,5401	-0,2074	Bosomprah S	Ghana	2	5,5401	-0,2074	3,2926	3
407	Justice Nonvignon	Ghana	5,5401	-0,2074	Chinbuah MA	Ghana	2	5,5401	-0,2074	3,2926	3
408	Justice Nonvignon	Ghana	5,5401	-0,2074	Eliason S	Ghana	2	5,5401	-0,2074	3,2926	3
409	Justice Nonvignon	Ghana	5,5401	-0,2074	Novignon J	Nigeria	4	9,058	7,4891	10,9891	1
410	Justice Nonvignon	Ghana	5,5401	-0,2074	Pallas SW	USA	4	38,8921	-77,0241	-73,5241	1
411	Justice Nonvignon	Ghana	5,5401	-0,2074	Tlotlego N	Congo	3	-4,3369	15,3271	18,8271	1
412	Obinna Onwujekwe	Nigeria	9,058	7,4891	Aliyu MH	USA	4	38,8921	-77,0241	-73,5241	3
413	Obinna Onwujekwe	Nigeria	9,058	7,4891	Chima R	Nigeria	2	9,058	7,4891	10,9891	6
414	Obinna Onwujekwe	Nigeria	9,058	7,4891	Chukwuogo O	Nigeria	2	9,058	7,4891	10,9891	6
415	Obinna Onwujekwe	Nigeria	9,058	7,4891	Dike N	USA	4	38,8921	-77,0241	-73,5241	3
416	Obinna Onwujekwe	Nigeria	9,058	7,4891	Enemuoh JC	Nigeria	2	9,058	7,4891	10,9891	6
417	Obinna Onwujekwe	Nigeria	9,058	7,4891	Etiaba E	Nigeria	2	9,058	7,4891	10,9891	6
418	Obinna Onwujekwe	Nigeria	9,058	7,4891	Ewelukwa O	Nigeria	2	9,058	7,4891	10,9891	6
419	Obinna Onwujekwe	Nigeria	9,058	7,4891	Ezenduka C	Nigeria	2	9,058	7,4891	10,9891	6
420	Obinna Onwujekwe	Nigeria	9,058	7,4891	Ezeoke OP	Nigeria	2	9,058	7,4891	10,9891	6
421	Obinna Onwujekwe	Nigeria	9,058	7,4891	Fox-Rushby J	the UK	4	51,5004	-0,1262	3,3738	4
422	Obinna Onwujekwe	Nigeria	9,058	7,4891	Hanson K	the UK	4	51,5004	-0,1262	3,3738	4
423	Obinna Onwujekwe	Nigeria	9,058	7,4891	Howe LD	the UK	4	51,5004	-0,1262	3,3738	4
424	Obinna Onwujekwe	Nigeria	9,058	7,4891	Kaur H	the UK	4	51,5004	-0,1262	3,3738	4
425	Obinna Onwujekwe	Nigeria	9,058	7,4891	Malik el-F	Sudan	3	4,8496	31,6046	35,1046	1
426	Obinna Onwujekwe	Nigeria	9,058	7,4891	Mangham LJ	the UK	4	51,5004	-0,1262	3,3738	4
427	Obinna Onwujekwe	Nigeria	9,058	7,4891	Mangham-Jefferies L	the UK	4	51,5004	-0,1262	3,3738	4
428	Obinna Onwujekwe	Nigeria	9,058	7,4891	Mbachu CO	Nigeria	2	9,058	7,4891	10,9891	6
429	Obinna Onwujekwe	Nigeria	9,058	7,4891	Nwagbo D.	Nigeria	2	9,058	7,4891	10,9891	6
430	Obinna Onwujekwe	Nigeria	9,058	7,4891	Obikeze E	Nigeria	2	9,058	7,4891	10,9891	6
431	Obinna Onwujekwe	Nigeria	9,058	7,4891	Ogah OS	South Africa	3	-26,7463	28,1876	31,6876	1
432	Obinna Onwujekwe	Nigeria	9,058	7,4891	Ogbonna C	Nigeria	2	9,058	7,4891	10,9891	6
433	Obinna Onwujekwe	Nigeria	9,058	7,4891	Ojukwu J	Nigeria	2	9,058	7,4891	10,9891	6
434	Obinna Onwujekwe	Nigeria	9,058	7,4891	Okereke E	Nigeria	2	9,058	7,4891	10,9891	6
435	Obinna Onwujekwe	Nigeria	9,058	7,4891	Okoronkwo IL	Nigeria	2	9,058	7,4891	10,9891	6
436	Obinna Onwujekwe	Nigeria	9,058	7,4891	Onoka CA	Nigeria	2	9,058	7,4891	10,9891	6
437	Obinna Onwujekwe	Nigeria	9,058	7,4891	Ughasoro MD	Nigeria	2	9,058	7,4891	10,9891	6
438	Obinna Onwujekwe	Nigeria	9,058	7,4891	Uguru N	Nigeria	2	9,058	7,4891	10,9891	6
439	Obinna Onwujekwe	Nigeria	9,058	7,4891	Uguru NP	Nigeria	2	9,058	7,4891	10,9891	6
440	Obinna Onwujekwe	Nigeria	9,058	7,4891	Uzochukwu B	Nigeria	2	9,058	7,4891	10,9891	6
441	Obinna Onwujekwe	Nigeria	9,058	7,4891	Uzochukwu BS	Nigeria	2	9,058	7,4891	10,9891	6
442	Obinna Onwujekwe	Nigeria	9,058	7,4891	Wiseman V	the UK	4	51,5004	-0,1262	3,3738	4
443	Sydney Rosen	South Africa	-26,7463	28,1876	Beard J	USA	4	38,8921	-77,0241	-73,5241	5
444	Sydney Rosen	South Africa	-26,7463	28,1876	Connelly D	USA	4	38,8921	-77,0241	-73,5241	5
445	Sydney Rosen	South Africa	-26,7463	28,1876	Connelly P	USA	4	38,8921	-77,0241	-73,5241	5
446	Sydney Rosen	South Africa	-26,7463	28,1876	Evian C	South Africa	2	-26,7463	28,1876	31,6876	6
447	Sydney Rosen	South Africa	-26,7463	28,1876	Feeley F	USA	4	38,8921	-77,0241	-73,5241	5
448	Sydney Rosen	South Africa	-26,7463	28,1876	Fox MP	South Africa	2	-26,7463	28,1876	31,6876	6
449	Sydney Rosen	South Africa	-26,7463	28,1876	Hamazakaza P	Zambia	3	15,4145	28,2809	31,7809	2
450	Sydney Rosen	South Africa	-26,7463	28,1876	Harries AD	France	4	48,8567	2,351	5,851	1
451	Sydney Rosen	South Africa	-26,7463	28,1876	Iyer HS	Zambia	3	15,4145	28,2809	31,7809	2
452	Sydney Rosen	South Africa	-26,7463	28,1876	Ketlhapile M	South Africa	2	-26,7463	28,1876	31,6876	6
453	Sydney Rosen	South Africa	-26,7463	28,1876	Larson B	USA	4	38,8921	-77,0241	-73,5241	5
454	Sydney Rosen	South Africa	-26,7463	28,1876	Long L	South Africa	2	-26,7463	28,1876	31,6876	6
455	Sydney Rosen	South Africa	-26,7463	28,1876	Marseille E	USA	4	38,8921	-77,0241	-73,5241	5
456	Sydney Rosen	South Africa	-26,7463	28,1876	Meyer-Rath G	USA	4	38,8921	-77,0241	-73,5241	5
457	Sydney Rosen	South Africa	-26,7463	28,1876	Miller CM	USA	4	38,8921	-77,0241	-73,5241	5
458	Sydney Rosen	South Africa	-26,7463	28,1876	Sanne I	South Africa	2	-26,7463	28,1876	31,6876	6
459	Sydney Rosen	South Africa	-26,7463	28,1876	Schnippel K	South Africa	2	-26,7463	28,1876	31,6876	6
460	Sydney Rosen	South Africa	-26,7463	28,1876	Scott CA	Zambia	3	15,4145	28,2809	31,7809	2
461	Sydney Rosen	South Africa	-26,7463	28,1876	Simon JL	USA	4	38,8921	-77,0241	-73,5241	5
462	Sydney Rosen	South Africa	-26,7463	28,1876	Thirumurthy H	USA	4	38,8921	-77,0241	-73,5241	5
463	Sydney Rosen	South Africa	-26,7463	28,1876	Vincent JR	USA	4	38,8921	-77,0241	-73,5241	5
464	Pascalina Chanda	Zambia	15,4145	28,2809	Barnes KI	South Africa	3	-26,7463	28,1876	31,6876	1
465	Pascalina Chanda	Zambia	15,4145	28,2809	Castillo-Riquelme M	South Africa	3	-26,7463	28,1876	31,6876	1
466	Pascalina Chanda	Zambia	15,4145	28,2809	Hamainza B	Zambia	2	15,4145	28,2809	31,7809	2
467	Pascalina Chanda	Zambia	15,4145	28,2809	Hamer DH	USA	4	38,8921	-77,0241	-73,5241	1
468	Pascalina Chanda	Zambia	15,4145	28,2809	Hawela M	Zambia	2	15,4145	28,2809	31,7809	2
469	Pascalina Chanda	Zambia	15,4145	28,2809	Masiye F	Zambia	2	15,4145	28,2809	31,7809	2
470	Pascalina Chanda	Zambia	15,4145	28,2809	Pearce RJ	the UK	4	51,5004	-0,1262	3,3738	1
471	Pascalina Chanda	Zambia	15,4145	28,2809	Sipilanyambe N	Zambia	2	15,4145	28,2809	31,7809	2
472	Pascalina Chanda	Zambia	15,4145	28,2809	Zurovac D	Kenya	3	-1,2762	36,7965	40,2965	1
