# Supplementary material for: Bibliometric trends of health economic evaluation in Sub-Saharan Africa
Source: Global Health. 2016 Aug 24;12(1):50. doi: 10.1186/s12992-016-0188-2 (PMC4997754; doi:10.1186/s12992-016-0188-2)
Supplement: Additional file 2: — This is the R code for generating the visual network maps. (R 1 kb) [file 12992_2016_188_MOESM2_ESM.r]

library (maps)
library(geosphere)
library (mapproj)

rm(list=ls(all=TRUE))
options(digits=4)

Pfad <- "N:/Karla/Projects/Gates/R/"
datatA<- read.csv2(paste(Pfad,"Database28092015.csv", sep = ""))
mode(datatA)
names(datatA)
dim(datatA)

##Creating the world map
map('world', fill = TRUE, col = "white",  xlim=c(-100,150), ylim=c(-60,80),bg="azure2")
##Africa
map('world', fill = TRUE, col = "white",  xlim=c(-25,60), ylim=c(-40,20),bg="azure2")
map.axes(cex.axis=1)

## Adding the scale to the map
##map.scale(0.1,-50,relwidth = 0.50, metric = TRUE, ratio = TRUE)

observations<-1:length(datatA[,2])
africa<-c(2,3)
## 2 = Red   lines
## 3 = Green lines
## 4 = Blue  lines

for (i in africa)
{
for (z in observations)
{
lat_a <- datatA[z,4] 
lon_a <- datatA[z,5] 
lat_ca <- datatA[z,9] 
lon_ca <-  if(i==2) {datatA[z,11]} else {datatA[z,10]} 
weigthline<-datatA[z,12]
inter <- gcIntermediate(c(lon_a, lat_a), c(lon_ca, lat_ca), n=50, addStartEnd=TRUE)
if (datatA[z,8]==i)(lines(inter, col = i,lwd=weigthline))
points(lon_a, lat_a,col=1,pch=16)
}
}
