# Supplementary material for: Bibliometric trends of health economic evaluation in Sub-Saharan Africa
Source: Global Health. 2016 Aug 24;12(1):50. doi: 10.1186/s12992-016-0188-2 (PMC4997754; doi:10.1186/s12992-016-0188-2)
Supplement: Additional file 3: — Database of included studies and characteristics, network articles, authorship and collaborations. (XLSX 182 kb) [file 12992_2016_188_MOESM3_ESM.xlsx]

## Sheet: data base
			ARTICLE IN FORMATION				GEOGRAPHIC SCOPE			DISEASE AND TYPE OF INTERVENTION			AUTHOR INFORMATION
Included	ID	Title	Database	Year (2004-2014)	Journal	Centre for Reviews and Dissemination (University of York) Summary	Country	Article Focus is on One Country (YES/NO)	Article focus is on Africa (YES/NO)	Type of Intervention	Disease	Main Conclusion	Authors	Affiliation Country of the First, Second and Third Authors	Authors' Background
included	1	Cost-effectiveness of nevirapine to prevent mother-to-child HIV transmission in eight African countries	NHS EED	2004	AIDS	http://www.ncbi.nlm.nih.gov/pubmed/?term=15280777	Botswana / Kenya / Tanzania / Uganda / Zambia / Zimbabwe.	NO	YES	Therapeutic Intervention - Drug	HIV/AIDS	Cost-effectiveness of nevirapine prophylaxis is influenced by health system costs, low client uptake, and poor effectiveness of nevirapine. Small reductions in maternal HIV prevalence or unintended pregnancy by HIV-infected women have equivalent impacts on infant HIV incidence and should be part of an overall strategy to lessen numbers of infant infections.	Sweat M D, O'Reilly K R, Schmid G P, Denison J, de Zoysa I	USA / Switzerland / Switzerland	Academic / WHO / WHO
EXCLUDED (AUTHORS NOT FROM AFRICA)	2	Cost effective analysis of strategies to combat HIV/AIDS in developing countries	NHS EED	2005	BMJ	http://www.crd.york.ac.uk/CRDWeb/ShowRecord.asp?ID=22005008484		NO	NO				Hogan D R, Baltussen R, Hayashi C, Lauer J A, Salomon J A	USA, Netherlands, Switzerland
included	3	Giving tranexamic acid to reduce surgical bleeding in sub-Saharan Africa: an economic evaluation	NHS EED	2010	Cost Effectiveness and Resource Allocation	http://www.resource-allocation.com/content/8/1/1/abstract	Kenya / South Africa / Tanzania / Botswana	NO	YES	Therapeutic Intervention - Drug	Bleeding in surgical patients	Giving tranexamic acid for bleeding in elective surgical patients was cost-effective and life saving, in countries with a blood shortage, and highly cost-saving and averted blood-borne infections, in countries where there was no shortage.	Guerriero C, Cairns J, Jayaraman S, Roberts I, Perel P, Shakur H	UK / UK / USA	Academic
included	4	The cost-utility analysis of adult male circumcision for prevention of heterosexual acquisition of HIV in men in sub-Saharan Africa: a probabilistic decision model	NHS EED	2011	Value in Health	http://www.ncbi.nlm.nih.gov/pubmed/?term=The+cost-utility+analysis+of+adult+male+circumcision+for+prevention+of+heterosexual+acquisition+of+HIV+in+men+in+sub-Saharan+Africa%3A+a+probabilistic+decision+model	Botswana	NO	YES	Preventative Intervention - Physical/Biological risk modification	HIV/AIDS	Adult male circumcision was cost saving and a promising strategy for the prevention of HIV in men, but it did not provide complete protection from HIV and should never replace other known methods of prevention.	Uthman OA, Popoola TA, Yahaya I, Uthman MM, Aremu O	UK / Nigeria / UK	Academic / Research Center / Academic
included	5	Costs and consequences of additional chest X-ray in a tuberculosis prevention program in Botswana	NHS EED	2011	American Journal of Respiratory and Critical Care Medicine	http://www.ncbi.nlm.nih.gov/pubmed/?term=21148723%5Buid%5D	Botswana	YES	YES	Diagnostic Tool - Imaging	Tuberculosis	In Botswana, the negative effects of adding CXR screening to symptom screening for IPT outweigh the beneficial effect of preventing INH-R and MDR TB, because of attrition during the screening process.ACXRscreening policy is beneficial only when attrition is close to 0%, but such a policy is unrealistic and unaffordable for resource-constrained countries such as Botswana.	Samandari T, Bishai D, Luteijn M, Mosimaneotsile B, Motsamai O, Postma M, Hubben G	Botswana and USA / USA / Germany	BOTUSA (partnership USA-Botswana) / Academic / Private sector
EXCLUDED (AUTHORS NOT FROM AFRICA)	7	Assessing the gain in diagnostic performance when two visual inspection methods are combined for cervical cancer prevention	NHS EED	2007	Journal of Medical Screening	http://www.crd.york.ac.uk/CRDWeb/ShowRecord.asp?ID=22007002212							Muwonge R, Walter S D, Wesley R S, Basu P, Shastri S S, Thara S, Mbalawa C G, Sankaranarayanan R	France/Canada/India
included	8	Cost-effectiveness of adding bed net distribution for malaria prevention to antenatal services in Kinshasa, Democratic Republic of the Congo	NHS EED	2009	American Journal of Tropical Medicine and Hygiene	http://www.ncbi.nlm.nih.gov/pubmed/?term=19706921%5Buid%5D	Congo	YES	YES	Preventative Intervention - Other	Malaria	resources were constrained, the greatest benefit would be among women in their first through fourth pregnancies. Thus, ITN distribution is a cost-effective addition to antenatal services.	Becker-Dreps SI, Biddle AK, Pettifor A, Musuamba G, Imbie DN, Meshnick S, Behets F	USA / USA / Congo	Academic
included	9	Asymptomatic Plasmodium falciparum infection is associated with anaemia in pregnancy and can be more cost-effectively detected by rapid diagnostic test than by microscopy in Kinshasa, Democratic Republic of the Congo	NHS EED	2014	Malaria Journal	http://www.crd.york.ac.uk/CRDWeb/ShowRecord.asp?ID=22014019670	Congo	YES	YES	Diagnostic Tool - Non-Imaging	Malaria	These alarming results emphasize the need to actively diagnose and treat asymptomatic malaria infection during all antenatal care visits.	Matangila JR, Lufuluabo J, Ibalanky AL, Inocencio Da Luz RA, Lutumba P, Van Geertruyden JP	Congo and Belgium/ Congo / Congo	Academic
included	10	Cost and cost-effectiveness of switching from d4T or AZT to a TDF-based first-line regimen in a resource-limited setting in rural Lesotho	NHS EED	2011	Journal of Acquired Immune Deficiency Syndromes	http://www.ncbi.nlm.nih.gov/pubmed/?term=21765366	Lesotho	YES	YES	Therapeutic Intervention - Drug	HIV/AIDS	This is one of the first analyses to investigate the cost-effectiveness of TDF using primary data in a resource-poor setting. Although TDF-based first-line ART is more costly than d4T, it is also more effective. Political pressure should be exerted to encourage further price reductions and additional generic manufacturing for TDF and partner drugs such as Efavirenz. This should be met by a commit…	Jouquet G, Bygrave H, Kranzer K, Ford N, Gadot L, Lee J, Hilderbrand K, Goemaere E, Vlahakis N, Trivino L, Makakole L, Cleary S	Lesotho / Lesotho / South Africa	Médecins Sans Frontières / Médecins Sans Frontières/ Academic
included	11	Voluntary medical male circumcision: modeling the impact and cost of expanding male circumcision for HIV prevention in eastern and southern Africa	NHS EED	2012	PLOS Medicine	http://www.ncbi.nlm.nih.gov/pmc/articles/PMC3226464/	Swaziland / Lesotho / Botswana / Malawi / Mozambique / Namibia / South Africa / Tanzania / Uganda / Zambia / Zimbabwe / Kenya	NO	YES	Preventative Intervention - Physical/Biological risk modification	HIV/AIDS	The authors concluded that the rapid scale-up of voluntary male circumcision led to a substantial reduction in HIV infections, in eastern and southern Africa, which reduced the health care costs and produced net savings.	Njeuhmeli E, Forsythe S, Reed J, Opuni M, Bollinger L, Heard N, Castor D, Stover J, Farley T, Menon V, Hankins C	USA	International non-profit organization / International non-profit organization / Research Center
included	12	Cost-effectiveness of treatment strategies for cervical infection among women at high risk in Madagascar	NHS EED	2007	Sex Transm Dis	http://journals.lww.com/stdjournal/Fulltext/2007/09000/Cost_Effectiveness_of_Treatment_Strategies_for.2.aspx	Madagascar	YES	YES	Management of Diseases and Conditions	Cervical Cancer / Cervical infection	The national guidelines are a reasonable strategy, especially in the context of resource constraints, relatively low reinfection rates, and local preferences.	McClamroch K, Behets F, Van Damme K, Rabenja L N, Myers E	USA (the 4th is from Madagascar)	Academic
included	13	Cost-effective diagnostic checklists for meningitis in resource-limited settings	NHS EED	2013	Journal of Acquired Immune Deficiency Syndromes	http://www.crd.york.ac.uk/CRDWeb/ShowRecord.asp?AccessionNumber=22013035873&UserID=0#.VQhd5ItF3wo	Malawi / South Africa / Zimbabwe	NO	YES	Diagnostic Tool - Non-Imaging	Meningitis	Through strategically choosing the order and type of testing coupled with disease prevalence rates, algorithms can deliver more care more efficiently. The algorithms presented herein are generalizable to East Africa and Southern Africa.	Durski KN, Kuntz KM, Yasukawa K, Virnig BA, Meya DB, Boulware DR	USA	Academic
included	14	Evaluation and costs of different haemoglobin methods for use in district hospitals in Malawi	NHS EED	2005	Journal of Clinical Pathology	http://www.ncbi.nlm.nih.gov/pubmed/?term=15623483%5Buid%5D	Malawi	YES	YES	Diagnostic Tool - Non-Imaging	haemoglobin analysis	The process for choosing appropriate laboratory methods is complex and very little guidance is available for health managers in poorer countries. This paper describes the development and testing of a practical model for gathering evidence about test efficiency that could be adapted for use in other resource poor settings.	Medina Lara A, Mundy C, Kandulu J, Chisuwo L, Bates I	UK / Malawi / Malawi	Academic / Public Sector / Public Sector
included	15	The cost-effectiveness of rotavirus vaccination in Malawi	NHS EED	2010	Journal of Infectious Diseases	http://www.crd.york.ac.uk/CRDWeb/ShowRecord.asp?ID=22010001545	Malawi	YES	YES	Therapeutic Intervention - Vaccines	Rotavirus (diarrheal)	Adopting Rotarix would likely be highly cost-effective for Malawi, particularly with GAVI support. This finding holds true across uncertainty ranges for key variables, including efficacy, for which data are becoming available.	Berry SA, Johns B, Shih C, Berry AA, Walker DG	USA	Academic
included	16	Cost-effectiveness of using HAART in prevention of mother-to-child transmission in the DREAM-project Malawi	NHS EED	2010	Journal of Acquired Immune Deficiency Syndromes	http://www.crd.york.ac.uk/CRDWeb/ShowRecord.asp?ID=22010002160	Malawi	YES	YES	Management of Diseases and Conditions / Therapeutic Intervention - Drug	HIV/AIDS	Administration of HAART in a PMTCT programme in resource-limited settings is cost-effective. Drugs and laboratory tests are the most significant costs, but further reduction of these expenses is possible.	Orlando S, Marazzi MC, Mancinelli S, Liotta G, Ceffa S, Giglio P, Alumando E, Ziegler I, Shawa M, Palombi L	Italy (the last two authors are from Malawi)	Academic
included	17	Cost-effectiveness of community-based management of acute malnutrition in Malawi	NHS EED	2012	Health Policy and Planning	http://www.crd.york.ac.uk/CRDWeb/ShowRecord.asp?ID=22012025859	Malawi	YES	YES	Management of Diseases and Conditions	Acute malnutrition	The results indicate the decision to scale-up CMAM within essential health services in Dowa was a cost-effective one and that scaling up CMAM in similar contexts is also likely to be cost-effective.	Wilford R, Golden K, Walker DG	Irland / Irland / USA	Non-for-profit organization / Non-for-profit organization / Academic
included	18	Cost-effectiveness analysis of option B+ for HIV prevention and treatment of mothers and children in Malawi	NHS EED	2013	PLOS ONE	http://www.crd.york.ac.uk/CRDWeb/ShowRecord.asp?ID=22013013617	Malawi	YES	YES	Management of Diseases and Conditions	HIV/AIDS	Malawi, Option B+ represents a favorable policy option from a cost-effectiveness perspective to prevent future infant infections, save mothers’ lives and reduce orphanhood. Although Option B+ would require more financial resources initially, it would save societal resources in the long-term and represents a strategic option to simplify and integrate HIV services into maternal, newborn and child h…	Fasawe O, Avila C, Shaffer N, Schouten E, Chimbwandira F, Hoos D, Nakakeeto O, de Lay P	Italy / USA / Switzerland	Academic / Private / WHO
included	19	Effect of women's groups and volunteer peer counselling on rates of mortality, morbidity, and health behaviours in mothers and children in rural Malawi (MaiMwana): a factorial, cluster-randomised controlled trial	NHS EED	2013	Lancet	http://www.crd.york.ac.uk/CRDWeb/ShowRecord.asp?ID=22013024869	Malawi	YES	YES	Health and Social Care Services	No a particular disease	Community mobilisation through women’s groups and volunteer peer counsellor health education are methods to improve maternal and child health outcomes in poor rural populations in Africa.	Lewycka S, Mwansambo C, Rosato M, Kazembe P, Phiri T, Mganga A, Chapota H, Malamba F, Kainja E, Newell ML, Greco G, Pulkki-Brannstrom AM, Skordis-Worrall J, Vergnano S, Osrin D, Costello A	UK / Malawi / UK	Academic / Public / Academic
included	20	Cost-effectiveness analysis of vaccinating children in Malawi with RTS,S vaccines in comparison with long-lasting insecticide-treated nets	NHS EED	2014	Malaria Journal	http://www.crd.york.ac.uk/CRDWeb/ShowRecord.asp?ID=22014011452	Malawi	YES	YES	Therapeutic Intervention - Vaccines	Malaria	The results showed that vaccinating Malawian children with RTS,S vaccines was very cost-effective from both a societal and a health service perspective.	Seo MK, Baker P, Ngo KN	UK	Academic
included	21	Comparison of deltamethrin as indoor residual spray or on insecticide treated nets for mosquito control in Lake Chilwa	NHS EED	2008	Malawi Medical Journal	http://www.ncbi.nlm.nih.gov/pmc/articles/PMC3345686/	Malawi	YES	YES	Preventative Intervention - Other	Malaria	Based on the prevailing market price of MK550 each, the cost of five nets was calculated as MK2750.00 per house hold of five compared to five 20 g knock-out tablets costing MK300.00 using IRS. The cost of IRS is 10 times cheaper than ITN. These results suggest that it is cheaper and more effective to use deltamethrin in IRS than in ITN.	Pemba D F, Bandason E, Namangale J	Malawi	Academic
included	22	Predicting trends in HIV-1 sexual transmission in sub-Saharan Africa through the drug resource enhancement against AIDS and malnutrition model: antiretrovirals for reduction of population infectivity, incidence and prevalence at the district level.	NHS EED	2012	Clinical Infectious Diseases	http://www.crd.york.ac.uk/CRDWeb/ShowRecord.asp?ID=22012029874	Malawi / Mozambique	NO	YES	Management of Diseases and Conditions	HIV/AIDS	Our model, based on patient data, supports the hypothesis that treatment of all infected individuals translates into a drastic reduction in incident HIV infections. A targeted implementation strategy with massive population coverage is feasible in sub-Saharan Africa.	Palombi L, Bernava GM, Nucita A, Giglio P, Liotta G, Nielsen-Saines K, Orlando S, Mancinelli S, Buonomo E, Scarcella P, Altan AMD, Guidotti G, Ceffa S, Haswell J, Zimba I, Magid NA, Marazzi MC	Italy (last two author from Malawi and Mozambique)	Academic / non-for-profit organization / Academic
included	23	Introducing auto-disable syringes to the national immunization programme in Madagascar	NHS EED	2004	Bulletin of the World Health Organization 2003	http://www.ncbi.nlm.nih.gov/pmc/articles/PMC2572525/	Madagascar	YES	YES	Support Tool - For Medical Intervention	national immunization programme	The use of auto-disable (AD) syringes increased the number of vaccinations administered outside of scheduled immunisation sessions, thus increasing the vaccination coverage rates. This increase was 3.6 to 3.8 times among children, and 6 to 20 times among women. Also, sterilisation sessions were decreased, thus contributing to worker safety. Although an AD-only programme was 5 times more expensive…	Drain P K, Ralaivao J S, Rakotonandrasana A, Carnell M A	Madagascar	Private / Privat / Public
included	24	The cost and cost-effectiveness of malaria vector control by residual insecticide house-spraying in southern Mozambique: a rural and urban analysis	NHS EED	2004	Tropical Medicine and International Health	http://www.crd.york.ac.uk/CRDWeb/ShowRecord.asp?ID=22004000327	Mozambique	NO	YES	Preventative Intervention - Other	Malaria	The results from both these initiatives, especially the rural area, should be interpreted as conservative cost estimates as they exclude the additional health gains that the newly introduced programmes have had on malaria rates in the neighbouring areas of South Africa and Swaziland. Both these initiatives show that introducing an IRS programme can deliver a reduction in malaria-related suffering…	Conteh L, Sharp B L, Streat E, Barreto A, Konar S	UK / South Africa / Mozambique	Academic / Research Center / Public
included	25	The cost-effectiveness of introducing hepatitis B vaccine into infant immunization services in Mozambique	NHS EED	2005	Health Policy and Planning	http://www.crd.york.ac.uk/CRDWeb/ShowRecord.asp?ID=22005008086	Mozambique	YES	YES	Therapeutic Intervention - Vaccines	hepatitis B	If policy makers value future health benefits equal to current benefits, the costeffectiveness of infant hepatitis B vaccination is in the range of other primary health care interventions for which similar analysis has been undertaken.	Griffiths U K, Hutton G, Dores Pascoal E D	Switzerland / Switzerland / Mozambique	WHO / Academic / WHO
included	26	Cost-effectiveness of malaria intermittent preventive treatment in infants (IPTi) in Mozambique and the United Republic of Tanzania	NHS EED	2009	Bulletin of the World Health Organization	http://www.crd.york.ac.uk/CRDWeb/ShowRecord.asp?ID=22009101091	Mozambique / Tanzania	NO	YES	Therapeutic Intervention - Drug	Malaria	From the health system and societal perspectives, IPTi with SP is expected to produce health improvements in a cost-effective way. From an economic perspective, it offers good value for money for public health programmes.	Hutton G, Schellenberg D, Tediosi F, Macete E, Kahigwa E, Sigauque B, Mas X, Trapero M, Tanner M, Trilla A, Alonso P, Menendez C	Switzerland / London / Switzerland ( 4th author from Mozambique)	Academic / Academic / Research Center
included	27	Cost-effectiveness of intermittent preventive treatment of malaria in pregnancy in Southern Mozambique	NHS EED	2010	PLOS ONE	http://www.crd.york.ac.uk/CRDWeb/ShowRecord.asp?ID=22010002109	Mozambique	YES	YES	Therapeutic Intervention - Drug / Management of Diseases and Conditions	Malaria	IPTp-SP was highly cost-effective for both prevention of maternal malaria and reduction of neonatal mortality in Mozambique.	Sicuri E, Bardaji A, Nhampossa T, Maixenchs M, Nhacolo A, Nhalungo D, Alonso PL, Menendez C	Spain / Spain / Mozambique	Research Center / Research Center / Research Center and Public
included	28	Cost-effectiveness analysis of an additional birth dose of Hepatitis B vaccine to prevent perinatal transmission in a medical setting in Mozambique	NHS EED	2012	Vaccine	http://www.crd.york.ac.uk/CRDWeb/ShowRecord.asp?ID=22013000680	Mozambique	YES	YES	Therapeutic Intervention - Vaccines	Hepatitis B	Assuming a willingness-to-pay threshold of 441 US$, which was the GDP per capita for Mozambique in 2008, the findings show the additional birth dose to be highly cost-effective. However, one-way sensitivity analysis reveals that the outcome changes with parameter variation.	Klingler C, Thoumi AI, Mrithinjayam VS	UK	Academic
included	29	Procalcitonin and C-reactive protein as predictors of blood culture positivity among hospitalised children with severe pneumonia in Mozambique	NHS EED	2012	Tropical Medicine and International Health	http://www.crd.york.ac.uk/CRDWeb/ShowRecord.asp?ID=22012033971	Mozambique	YES	YES	Diagnostic Tool - Non-Imaging	pneumonia	Among hospitalised children with CSP and absence of concurrent malaria, PCT prescreening could help reduce the number of blood cultures and diagnosis costs by specifically targeting patients more likely to yield positive results.	Diez-Padrisa N, Bassat Q, Morais L, O'Callaghan-Gordo C, Machevo S, Nhampossa T, Ibarz-Pavon AB, Quinto L, Alonso PL, Roca A	Spain, Mozambique / Spain, Mozambique / Mozambique	Academic and Research Center / Academic and Research Center / Research Center
included	30	The clinical and economic impact of point-of-care CD4 testing in Mozambique and other resource-limited settings: a cost-effectiveness analysis	NHS EED	2014	PLOS Medicine	http://www.crd.york.ac.uk/CRDWeb/ShowRecord.asp?ID=22014036604	Mozambique	YES	YES	Diagnostic Tool - Non-Imaging	HIV/AIDS	POC-CD4 at the time of HIV diagnosis could improve survival and be cost-effective compared to LAB-CD4 in Mozambique, if it improves linkage to care. POC-CD4 could have the greatest impact on mortality in settings where resources for HIV testing and linkage are most limited.	Hyle EP, Jani IV, Lehe J, Su AE, Wood R, Quevedo J, Losina E, Bassett IV, Pei PP, Paltiel AD, Resch S, Freedberg KA, Peter T, Walensky RP	USA / Mozambique / Mozambique	Research Center / Public / non-for-profit
included	31	The development of a public optometry system in Mozambique: a cost benefit analysis	NHS EED	2014	BMC Health Services Research	http://www.crd.york.ac.uk/CRDWeb/ShowRecord.asp?ID=22014037216	Mozambique	YES	YES	Management of Diseases and Conditions	uncorrected refractive error	This study demonstrates that a programme designed to address the burden of refractive error in Mozambique is economically justifiable in terms of the increased productivity that would result due to its implementation.	Thompson S, Naidoo K, Harris G, Bilotto L, Ferrao J, Loughman J	South Africa and Irland / South Africa / South Africa	Research Center
EXCLUDED (AUTHORS NOT FROM AFRICA)	32	Cost-effectiveness of new-generation oral cholera vaccines: a multisite analysis	NHS EED	2009	Value in Health	http://www.crd.york.ac.uk/CRDWeb/ShowRecord.asp?ID=22009102953	Mozambique	NO	NO	Therapeutic Intervention - Vaccines	cholera	Ignoring the indirect effects of cholera vaccination has led to underestimation of the cost-effectiveness of vaccination programs with oral cholera vaccines. Once these effects are included, use of the oral killed whole cell vaccine in programs to control endemic cholera meets the per capita GDP criterion in several developing country settings.	Jeuland M, Cook J, Poulos C, Clemens J, Whittington D	USA	Academic / Academic / Research Center
included	33	Should countries implementing an artemisinin-based combination malaria treatment policy also introduce rapid diagnostic tests?	NHS EED	2008	Malaria Journal	http://www.crd.york.ac.uk/CRDWeb/ShowRecord.asp?ID=22008101991	Mozambique	YES	YES	Diagnostic Tool - Non-Imaging / Therapeutic Intervention - Drug	Malaria	While the use of RDTs in all suspected cases has been shown to be cost-saving when parasite prevalence among clinically diagnosed malaria cases is low to moderate, findings show that targeting RDTs at the group older than six years and treating children less than six years on the basis of clinical diagnosis is even more cost-saving.	Zikusooka C M,McIntyre D,Barnes K I	South Africa	Academic
included	34	The cost effectiveness of pharmacological smoking cessation therapies in developing countries: a case study in the Seychelles	NHS EED	2004	Tobacco Control	http://www.crd.york.ac.uk/CRDWeb/ShowRecord.asp?ID=22004008227	Seychelles	YES	YES	Therapeutic Intervention - Drug	smoking cessation	Pharmacological cessation therapy can be highly cost effective as compared to other common medical interventions in low mortality, middle income countries, particularly if medications can be procured at low prices.	Gilbert A R, Pinget C, Bovet P, Cornuz J, Shamlaye C, Paccaud F	Switzerland (the 5th author is from Seychelles)	Academic
included	35	Potential impact of single-risk-factor versus total risk management for the prevention of cardiovascular events in Seychelles	NHS EED	2011	Bulletin of the World Health Organization	http://www.crd.york.ac.uk/CRDWeb/ShowRecord.asp?ID=22011000869	Seychelles	YES	YES	Management of Diseases and Conditions	cardiovascular events	Total CV risk management is much more cost-effective than single-risk-factor management. These findings are relevant for all countries, but especially for those economically and demographically similar to Seychelles.	Ndindjock R, Gedeon J, Mendis S, Paccaud F, Bovet P	USA / Seychelles / Switzerland	Academic / Public / WHO
included	36	A novel Markov model projecting costs and outcomes of providing antiretroviral therapy to public patients in private practices versus public clinics in South Africa	NHS EED	2013	PLOS ONE	http://www.crd.york.ac.uk/CRDWeb/ShowRecord.asp?ID=22013009491	South Africa	YES	YES	Health and Social Care Services	HIV/AIDS	Using a novel Markov model, we determined that the private-care program had similar outcomes but lower costs than the public-care program, largely due to lower visit frequencies. These findings have important implications for increasing and sustaining coverage of patients in need of ART care in resource-limited settings.	Leisegang R, Maartens G, Hislop M, Sargent J, Darkoh E, Cleary S	South Africa	Academic / Academic / non-for-profit organization
included	37	Cost of childhood diarrhoea in rural South Africa: exploring cost-effectiveness of universal zinc supplementation	NHS EED	2013	Public Health Nutrition	http://www.crd.york.ac.uk/CRDWeb/ShowRecord.asp?ID=22013038102	South Africa	YES	YES	Preventative Intervention - Nutrition and Chemoprevention	diarrhoeal	This simulation suggests that universal VAZ would be cost-effective at current levels of stunting in parts of South Africa. This requires further validation under actual programmatic conditions.	Chhagan MK, Van den Broeck J, Luabeya KK, Mpontshane N, Bennish ML	South Africa / Norway / South Africa	Academic
included	38	Diagnosing Xpert MTB/RIF negative TB: impact and cost of alternative algorithms for South Africa	NHS EED	2013	South African Medical Journal	http://www.crd.york.ac.uk/CRDWeb/ShowRecord.asp?ID=22013015197	South Africa	YES	YES	Support Tool - For Medical Intervention	tuberculosis / HIV	Modifying the diagnostic algorithm from X/C to X/X could provide rapid results, simplify diagnostic processes, improve HIV/TB treatment outcomes, and generate cost savings.	Schnippel K, Meyer-Rath G, Long L, Stevens WS, Sanne I, Rosen S	South Africa /South Africa and USA / South Africa	Academic
included	39	Expanding ART for treatment and prevention of HIV in South Africa: estimated cost and cost-effectiveness 2011-2050	NHS EED	2012	PLOS ONE	http://www.crd.york.ac.uk/CRDWeb/ShowRecord.asp?ID=22012009024	South Africa / Malawi	NO	YES	Preventative Intervention - Nutrition and Chemoprevention	HIV/AIDS	Increasing the provision of ART to ,350 cells/mm3 may significantly reduce costs while reducing the HIV burden. Feasibility including HIV testing and ART uptake, retention, and adherence should be evaluated.	Granich R, Kahn JG, Bennett R, Holmes CB, Garg N, Serenata C, Sabin ML, Makhlouf-Obermeyer C, de Filippo Mack C, Williams P, Jones L, Smyth C, Kutch KA, Ying-Ru L, Vitoria M, Souteyrand Y, Crowley S, Korenromp EL, Williams BG	Switzerland / USA / UK ( two authors are from South Africa)	WHO / Academic / Academic
included	40	Evaluating the cost-effectiveness of pre-exposure prophylaxis (PrEP) and its impact on HIV-1 transmission in South Africa	NHS EED	2010	PLOS ONE	http://www.crd.york.ac.uk/CRDWeb/ShowRecord.asp?ID=22010002174	South Africa	YES	YES	Preventative Intervention - Nutrition and Chemoprevention	HIV/AIDS	The cost-effectiveness of PrEP relative to ART decreases rapidly as ART coverage increases beyond three times its coverage in 2010, after which the ART program would provide coverage to more than 65% of HIV+ individuals. To have a high relative cost-effective impact on reducing infections in generalized epidemics, PrEP must utilize a window of opportunity until ART has been scaled up beyond this …	Pretorius C, Stover J, Bollinger L, Bacaer N, Williams B	USA (the 5th is from South Africa)	Private
included	41	Cost and cost-effectiveness of switching from stavudine to tenofovir in first-line antiretroviral regimens in South Africa	NHS EED	2008	Journal of Acquired Immune Deficiency Syndromes	http://www.crd.york.ac.uk/CRDWeb/ShowRecord.asp?ID=22008101860	South Africa	YES	YES	Therapeutic Intervention - Drug	HIV/AIDS	At a TDF price of $17.00/month, savings on d4T toxicity management will offset roughly 20% of the higher price of TDF. The price of TDF would have to fall substantially to make the change cost neutral for South Africa in budgetary terms, but it would be highly cost effective at a price only slightly less than what is currently available.	Rosen S, Long L, Fox M, Sanne I	USA and South Africa / South Africa / USA and South Africa	Academic
included	42	The outcomes and outpatient costs of different models of antiretroviral treatment delivery in South Africa	NHS EED	2008	Tropical Medicine and International Health	http://www.crd.york.ac.uk/CRDWeb/ShowRecord.asp?ID=22008102481	South Africa	YES	YES	Health and Social Care Services	HIV/AIDS	If all ART patients remain in care and responding, total costs will increase but the average cost to produce an IC patient will fall. The cost per ART patient treated varies moderately among sites. Cost differences increase markedly when patient outcomes are taken into account	Rosen S, Long L, Sanne I	USA and South Africa / South Africa / South Africa	Academic and Research Center / Research Center / Academic and Research Center
included	43	Cost-effectiveness of highly active antiretroviral therapy in South Africa	NHS EED	2006	PLOS Medicine	http://www.crd.york.ac.uk/CRDWeb/ShowRecord.asp?ID=22013005367	South Africa	YES	YES	Therapeutic Intervention - Drug	HIV/AIDS	HAART is a cost-effective intervention in South Africa, and cost saving when HAART prices are further reduced. Our estimates, however, were based on direct costs, and as such the actual cost saving might have been underestimated if indirect costs were also included.	Badri M, Maartens G, Mandalia S, Bekker LG, Penrod JR, Platt RW, Wood R, Beck EJ	South Africa / South Africa / UK	Academic / Academic / Research Center and Academic
included	44	Cost-effectiveness of HIV rescreening during late pregnancy to prevent mother-to-child HIV transmission in South Africa and other resource-limited settings	NHS EED	2006	Journal of Acquired Immune Deficiency Syndromes	http://www.crd.york.ac.uk/CRDWeb/ShowRecord.asp?ID=22006001302	South Africa	YES	YES	Support Tool - For Medical Intervention	HIV/AIDS	HIV rescreening late in pregnancy in high-prevalence, resource-limited settings such as South Africa would be a cost-effective strategy for reducing mother-to-child transmission.	Soorapanth S, Sansom S, Bulterys M, Besser M, Theron G, Fowler M G	USA (the 4th and 5th are from South Africa)	Public
included	45	Economic analysis of the diagnosis of smear-negative pulmonary tuberculosis in South Africa: incorporation of a new rapid test, FASTPlaqueTB, into the diagnostic algorithm	NHS EED	2004	International Journal of Tuberculosis and Lung Disease	http://www.crd.york.ac.uk/CRDWeb/ShowRecord.asp?ID=22004000673	South Africa	YES	YES	Diagnostic Tool - Non-Imaging	pulmonary tuberculosis	The use of FASTPlaqueTB can assist in improving existing case detection strategies and may be cost-effectively integrated into the current diagnostic infrastructure, offering patients more rapid and reliable diagnosis whilst reducing the overall cost.	Albert H	South Africa	private
included	46	Assessing effectiveness and cost-effectiveness of concurrency reduction for HIV prevention	NHS EED	2011	International Journal of STD and AIDS	http://www.ncbi.nlm.nih.gov/pmc/articles/PMC3230224/	Swaziland / Tanzania / Uganda / Zambia	NO	YES	Preventative Intervention - Behavioural risk modification	HIV/AIDS	The authors concluded that programmes to reduce concurrent sexual relationships could be cost-effective in reducing HIV incidence over a wide range of assumptions. Targeting those with the most concurrent relationships was most effective.	Enns EA, Brandeau ML, Igeme TK, Bendavid E	USA	Academic
included	47	Cost-effectiveness of canine vaccination to prevent human rabies in rural Tanzania	NHS EED	2014	Annals of Internal Medicine	http://www.crd.york.ac.uk/CRDWeb/ShowRecord.asp?ID=22014010957	Tanzania	YES	YES	Preventative Intervention - Other	human rabies	Annual canine rabies vaccination campaigns confer extraordinary value and dramatically reduce the health burden of rabies.	Fitzpatrick MC, Hampson K, Cleaveland S, Mzimbiri I, Lankester F, Lembo T, Meyers LA, Paltiel AD, Galvani AP	USA / UK / USA	Academic
included	48	Cost-effectiveness of dihydroartemisinin-piperaquine compared with artemether-lumefantrine for treating uncomplicated malaria in children at a district hospital in Tanzania	NHS EED	2014	Malaria Journal	http://www.crd.york.ac.uk/CRDWeb/ShowRecord.asp?ID=22014036607	Tanzania	NO	YES	Therapeutic Intervention - Drug	Malaria	Dihydroartemisinin-piperaquine is a very cost-effective anti-malarial drug. The findings support its use as an alternative first-line drug for treatment of uncomplicated malaria in children in Tanzania and other sub-Saharan African countries with similar healthcare infrastructures and epidemiology of malaria.	Mori AT, Ngalesoni F, Norheim OF, Robberstad B	Norway and Tanzania / Norway and Tanzania / Norway	Academic / Academic and Public / Academic
included	49	Costs and impacts of scaling up voluntary medical male circumcision in Tanzania	NHS EED	2014	PLOS ONE	http://www.crd.york.ac.uk/CRDWeb/ShowRecord.asp?ID=22014023714	Tanzania	YES	YES	Preventative Intervention - Physical/Biological risk modification	HIV/AIDS	VMMC could have an immediate impact on HIV transmission, but the full impact on prevalence and deaths will only be apparent in the longer term because VMMC averts infections some years into the future among people who have been circumcised. Given the health and economic benefits of investing in VMMC, the scale-up of services should continue to be a central component of the national HIV prevention…	Menon V, Gold E, Godbole R, Castor D, Mahler H, Forsythe S, Ally M, Njeuhmeli E	USA (two authors from the list are from Tanzania)	Public and Academic / non-for-profit / Public and Academic
included	50	Over-diagnosis of malaria by microscopy in the Kilombero Valley, Southern Tanzania: an evaluation of the utility and cost-effectiveness of rapid diagnostic tests	NHS EED	2013	Malaria Journal	http://www.crd.york.ac.uk/CRDWeb/ShowRecord.asp?ID=22013020454	Tanzania	YES	YES	Diagnostic Tool - Non-Imaging	Malaria	With estimated prevalence at 14%, RDT introduction is recommended given WHO findings that RDTs are predicted to be cost-effective in prevalence areas of less than 20%. The use of RDTs in malaria diagnosis would not only reduce government spending but would prove beneficial to ensuring appropriate care and treatment of febrile illness.	Harchut K, Standley C, Dobson A, Klaassen B, Rambaud-Althaus C, Althaus F, Nowak K	USA (the 4th is from Tanzania)	Academic
included	51	Pooling ocular swab specimens from Tanzania for testing by Roche Amplicor and Aptima Combo 2 assays for the detection of Chlamydia trachomatis: accuracy and cost-savings	NHS EED	2013	Diagnostic Microbiology and Infectious Disease	http://www.crd.york.ac.uk/CRDWeb/ShowRecord.asp?ID=22014000313	Tanzania	YES	YES	Diagnostic Tool - Non-Imaging	ocular infections of Chlamydia trachomatis (CT)	Pooling would be an accurate method and so far resulted in a cost-savings of 62.2%.	Dize L, West S, Quinn TC, Gaydos CA	USA	Academic / Academic / Academic and Public
included	52	Preventing mother to child transmission of HIV with highly active antiretroviral treatment in Tanzania: a prospective cost-effectiveness study	NHS EED	2010	Journal of Acquired Immune Deficiency Syndromes	http://www.crd.york.ac.uk/CRDWeb/ShowRecord.asp?ID=22010001982	Tanzania	YES	YES	Preventative Intervention - Nutrition and Chemoprevention	HIV/AIDS	We find that a highly active antiretroviral therapy–based PMTCT Plus regimen is more cost effective than the current Tanzanian standard of care with single-dose nevirapine.	Robberstad B, Evjen-Olsen B	Norway / Norway and Tanzania	Academic / Academic and Research Institute
included	53	Cost-effectiveness of free HIV voluntary counselling and testing through a community-based AIDS service organization in northern Tanzania	NHS EED	2006	American Journal of Public Health	http://www.crd.york.ac.uk/CRDWeb/ShowRecord.asp?ID=22006008049	Tanzania	YES	YES	Health and Social Care Services	HIV/AIDS	The provision of free VCT enhances both the number of clients testing per day and its cost-effectiveness in resource-limited settings.	Thielman N M, Chu H Y, Ostermann J, Itemba D K, Mgonja A, Mtweve S, Bartlett J A, Shao J F, Crump J A	USA	Academic
included	54	Cost-effectiveness study of three antimalarial drug combinations in Tanzania	NHS EED	2006	PLOS Medicine	http://www.crd.york.ac.uk/CRDWeb/ShowRecord.asp?ID=22006002387	Tanzania	YES	YES	Therapeutic Intervention - Drug	Malaria	In an area of high drug resistance, there is evidence that AL and AQþAS are the most costeffective drugs despite being the most expensive, because they are significantly more effective than other options and therefore reduce the need for further treatment. This is not necessarily the case in parts of Africa where recrudescence following SP and AQ treatment (and their combination) is lower so that…	Wiseman V, Kim M, Mutabingwa T K, Whitty C J	UK / UK / Tanzania and UK	Academic / Academic / Research Center and Academic
included	55	Modelling the cost-effectiveness of introducing rapid syphilis tests into an antenatal syphilis screening programme in Mwanza, Tanzania	NHS EED	2006	Sexually Transmitted Infections	http://www.crd.york.ac.uk/CRDWeb/ShowRecord.asp?ID=22007000505	Tanzania	YES	YES	Diagnostic Tool - Non-Imaging	syphilis	Although the price of most POC tests needs to be reduced to make them as cost-effective as RPR, their simplicity and limited requirements for electricity/equipment suggest their use could improve the coverage of antenatal syphilis screening in developing countries.	Vickerman P, Peeling R W, Terris-Prestholt F, Changalucha J, Mabey D, Watson-Jones D, Watts C	UK / Switzerland / UK	Academic / WHO / Academic
included	56	Effectiveness and cost of facility-based integrated management of childhood illness (IMCI) in Tanzania	NHS EED	2004	Lancet	http://www.crd.york.ac.uk/CRDWeb/ShowRecord.asp?ID=22004008390	Tanzania	YES	YES	Health and Social Care Services	Childhood Illness	Our findings indicate that facility-based IMCI is good value for money, and support widespread implementation in the context of health-sector reform, basket funding, good facility access, and high utilisation of health facilities.	Armstrong Schellenberg J R, Adam T, Mshinda H, Masanja H, Kabadi G, Mukasa O, John T, Charles S, Nathan R, Wilczynska K, Mgalula, Mbuya C, Msiwa R, Manzi F, de Savigny D, Schellenberg D, Victoria C	Tanzania and the UK and Switzerland / Switzerland / Tanzania	Research Center / WHO / Research Center
included	57	Cost-effectiveness of PrEP in HIV/AIDS control in Zambia: a stochastic league approach	NHS EED	2014	Journal of Acquired Immune Deficiency Syndromes	http://www.crd.york.ac.uk/CRDWeb/ShowRecord.asp?ID=22014016052	Zambia	YES	YES	Preventative Intervention - Nutrition and Chemoprevention	HIV/AIDS	Treatment initiation at CD4 ,500 is a cost-effective HIV prevention approach that will require a modest increase in budget. Although adding PrEP will avert more infections, it is not economically feasible, as it requires a 10-fold increase in budget.	Nichols BE, Baltussen R, van Dijk JH, Thuma PE, Nouwen JL, Boucher CA, van de Vijver DA	Netherlands / Netherlands / Zambia	Academic / Academic / Research Center
included	58	Health outcomes and cost impact of the new WHO 2013 Guidelines on prevention of mother-to-child transmission of HIV in Zambia	NHS EED	2014	PLOS ONE	http://www.crd.york.ac.uk/CRDWeb/ShowRecord.asp?ID=22014018171	Zambia	YES	YES	Preventative Intervention - Nutrition and Chemoprevention	HIV/AIDS	The shift to the WHO 2013 guidelines in Zambia would positively impact health of family and save future costs related to care and treatment.	Ishikawa N, Shimbo T, Miyano S, Sikazwe I, Mwango A, Ghidinelli MN, Syakantu G	Japan ( the four and third authors are from Zambia)	Research Center
included	59	Assessing Zambia's industrial fortification options: getting beyond changes in prevalence and cost-effectiveness	NHS EED	2013	Food and Nutrition Bulletin	http://www.crd.york.ac.uk/CRDWeb/ShowRecord.asp?ID=22014013389	Zambia	YES	YES	Preventative Intervention - Nutrition and Chemoprevention	micronutrient deficiencies	Assessing fortification portfolios by measuring changes in the prevalence of inadequate intakes underestimates impact. A more sensitive measure,which also takes into account change in the Estimated Average Requirement (EAR) gap, is provided by a dose–response-based approach to estimating the number of DALYs saved. There exist highly cost-effective fortification intervention portfolios with substa…	Fiedler JL, Lividini K, Kabaghe G, Zulu R, Tehinse J, Bermudez OI, Jallier V, Guyondet C	USA / USA / Zambia	Research Center / Research Center / Public
included	60	Cost-effectiveness of pre-exposure prophylaxis (PrEP) in preventing HIV-1 infections in rural Zambia: a modeling study	NHS EED	2013	PLOS ONE	http://www.crd.york.ac.uk/CRDWeb/ShowRecord.asp?ID=22013014516	Zambia	YES	YES	Preventative Intervention - Nutrition and Chemoprevention	HIV/AIDS	Even in settings with low test rates and treatment retention, the use of PrEP can still be a useful strategy in averting infections. Our model has shown that PrEP is a cost-effective strategy for reducing HIV incidence, even when adherence is suboptimal and prioritization is imperfect.	Nichols BE, Boucher CAB, van Dijk JH, Thuma PE, Nouwen JL, Baltussen R, van de Wijgert J, Sloot PM, van de Vijver DA	Netherlands / Netherlands / Zambia	Academic / Academic / Research Center
included	61	An assessment of cost, quality and outcomes for five HIV prevention youth peer education programs in Zambia	NHS EED	2012	Health Education Research	http://www.crd.york.ac.uk/CRDWeb/ShowRecord.asp?ID=22012021275	Zambia	YES	YES	Preventative Intervention - Behavioural risk modification	HIV/AIDS	The study revealed wide variation in the cost, quality and outcomes of YPE programs. Higher quality programs were associated with greater exposure and more referrals of youth to the clinics. However, one of the two highest quality programs achieved twice as many exposure and referral outcomes at about half the cost per peer educator of the more expensive program. Results indicate that the standar…	Burke, H. M, Pedersen, K. F, Williamson, N. E	USA	Non-for-profit organization / Non-for-profit organization / Academic
included	62	Taking art to scale: determinants of the cost and cost-effectiveness of antiretroviral therapy in 45 clinical sites in Zambia	NHS EED	2012	PLOS ONE	http://www.crd.york.ac.uk/CRDWeb/ShowRecord.asp?ID=22013003650	Zambia	YES	YES	Management of Diseases and Conditions	HIV/AIDS	Early treatment initiation, large scale, and hospital setting, are associated with statistically significantly lower costs, while others (rural location, private sector) are associated with shifting cost from on- to off-site. This study shows that ART programs can be significantly less costly or more cost-effective when they exploit economies of scale and scope, and initiate patients at higher CD…	Marseille E, Giganti MJ, Mwango A, Chisembele-Taylor A, Mulenga L, Over M, Kahn JG, Stringer JSA	USA / Zambia / Zambia	privat / research center / public
included	63	Cost-effectiveness analysis of the available strategies for diagnosing malaria in outpatient clinics in Zambia	NHS EED	2009	Cost Effectiveness and Resource Allocation	http://www.crd.york.ac.uk/CRDWeb/ShowRecord.asp?ID=22009101975	Zambia	YES	YES	Diagnostic Tool - Non-Imaging	Malaria	RDTs were the most cost effective method at correctly diagnosing malaria in primary health facilities in Zambia when compared to clinical and microscopy strategies. However, the treatment prescription practices of the health workers can impact on the potential that a diagnostic test has to lead to savings on antimalarials. The results of this study will serve to inform policy makers on which alte…	Chanda P, Castillo-Riquelme M, Masiye F	Zambia / South Africa / Zambia	Public / Academic / Academic
included	64	Cost effectiveness of community-based therapeutic care for children with severe acute malnutrition in Zambia: decision tree model	NHS EED	2009	Cost Effectiveness and Resource Allocation	http://www.crd.york.ac.uk/CRDWeb/ShowRecord.asp?ID=22009100748	Zambia	YES	YES	Health and Social Care Services	Acute malnutrition	CTC is relatively cost effective compared to other priority health care interventions in developing countries, for a wide range of assumptions.	Bachmann, M O	UK	Academic
included	65	The cost-effectiveness of cotrimoxazole prophylaxis in HIV-infected children in Zambia	NHS EED	2008	AIDS	http://www.crd.york.ac.uk/CRDWeb/ShowRecord.asp?ID=22008100478	Zambia	YES	YES	Therapeutic Intervention - Drug / Preventative Intervention - Nutrition and Chemoprevention	HIV/AIDS	Cotrimoxazole prophylaxis in HIV-infected children is an inexpensive low technology intervention that is highly cost-effective in Zambia, strongly supporting the adoption of WHO guidelines into essential healthcare packages in low-income countries.	Ryan M, Griffin S, Chitah B, Walker A S, Mulenga V, Kalolo D, Hawkins N, Merry C, Barry M G, Chintu C, Sculpher M J, Gibb D M	Ireland / UK / Zambia	Academic / Academic / Public
included	66	A cost-effectiveness analysis of artemether lumefantrine for treatment of uncomplicated malaria in Zambia	NHS EED	2007	Malaria Journal	http://www.crd.york.ac.uk/CRDWeb/ShowRecord.asp?ID=22007000408	Zambia	YES	YES	Therapeutic Intervention - Drug	Malaria	This study suggests the decision to adopt AL is justifiable on both economic and public health grounds.	Chanda P, Masiye F, Chitah B M, Sipilanyambe N, Hawela M, Banda P, Okorosobo T	Zambia	Public / Academic / Public
included	67	Setting priorities for the health care sector in Zimbabwe using cost-effectiveness analysis and estimates of the burden of disease	NHS EED	2008	Cost Effectiveness and Resource Allocation	http://www.crd.york.ac.uk/CRDWeb/ShowRecord.asp?ID=22008101600	Zimbabwe	YES	YES	Other	No a particular disease	The present study showed that it was feasible to conduct cost-effectiveness analyses for a large number of health interventions in a developing country like Zimbabwe using a consistent methodology.	Hansen K S, Chapman G	Denmark / UK	Academic
included	68	Cost effectiveness analysis of clinically driven versus routine laboratory monitoring of antiretroviral therapy in Uganda and Zimbabwe	NHS EED	2012	PLOS ONE	http://www.crd.york.ac.uk/CRDWeb/ShowRecord.asp?ID=22012018846	Zimbabwe / Uganda	NO	YES	Support Tool - For Medical Intervention	HIV/AIDS	There is no rationale for routine toxicity monitoring, which did not affect outcomes and was costly. Even though beneficial, there is little justification for routine 12-weekly CD4 monitoring of ART at current test costs in low-income African countries. CD4 monitoring, restricted to the second year on ART onwards, could be cost-effective with lower cost second-line therapy and development of a ch…	Lara A, Kigozi J, Amurwon J, Muchabaiwa L, Wakaholi B, Mota RE, Walker AS, Kasirye R, Ssali F, Reid A, Grosskurth H, Babiker AG, Kityo C, Katabira E, Munderi P, Mugyenyi P, Hakim J, Darbyshire J, Gibb DM, Gilks CF	UK / Uganda / Uganda	Academic / Research Center / Research Center
included	69	Cost-effectiveness of school support for orphan girls to prevent HIV infection in Zimbabwe	NHS EED	2013	Prevention Science	http://www.crd.york.ac.uk/CRDWeb/ShowRecord.asp?ID=22013006100	Zimbabwe	YES	YES	Preventative Intervention - Behavioural risk modification	HIV/AIDS	Boarding was not cost-effective. It cost an additional $1,234 per girl boarded (over the three years of the study, discounted to present value at a 3% discount rate) but had no effect on any of the outcome measures relative to girls in the treatment group who did not board. For girls who did not board, the average cost of approximately three years of school support was US$973.	Miller T, Hallfors D, Cho H, Luseno W, Waehrer G	USA	non-for-profit organization
included	70	Cost-effectiveness of World Health Organization 2010 guidelines for prevention of mother-to-child HIV transmission in Zimbabwe	NHS EED	2013	Clinical Infectious Diseases	http://www.crd.york.ac.uk/CRDWeb/ShowRecord.asp?ID=22013006655	Zimbabwe	YES	YES	Preventative Intervention - Nutrition and Chemoprevention	HIV/AIDS	Replacing sdNVP with Option A or Option B will improve maternal and infant outcomes and save money; Option B increases health benefits and decreases costs compared with Option A. Option B+ further improves maternal outcomes, with an ICER (compared with Option B) similar to many current HIV-related healthcare interventions.	Ciaranello AL, Perez F, Engelsmann B, Walensky RP, Mushavi A, Rusibamayila A, Keatinge J, Park JE, Maruva M, Cerda R, Wood R, Dabis F, Freedberg KA	USA / France and USA / Zimbabwe	Research Center
included	71	Cost-effectiveness of community vegetable gardens for people living with HIV in Zimbabwe	NHS EED	2014	Cost Effectiveness and Resource Allocation	http://www.crd.york.ac.uk/CRDWeb/ShowRecord.asp?ID=22014021476	Zimbabwe	YES	YES	Preventative Intervention - Nutrition and Chemoprevention	HIV/AIDS	Cost outcomes were 20–30 times Zimbabwe's per capita GDP, and unlikely to be affordable within government services. This analysis concludes that LIGs are not cost-effective or affordable relative to other interventions for improving health and nutrition status of PLHIV. Nonetheless, given the myriad benefits acquired by participant households, such programs hold important potential to improve qua…	Puett C, Salpeteur C, Lacroix E, Zimunya SD, Israel AD, Ait-Aissa M	USA / France / Myanmar (last author from Zimbabwe)	non-for-profit
included	72	Cost-effectiveness of a community-based intervention for reducing the transmission of Schistosoma haematobium and HIV in Africa	NHS EED	2013	Proceedings of the National Academy of Sciences of the United States of America	http://www.crd.york.ac.uk/CRDWeb/ShowRecord.asp?ID=22013016508	Zimbabwe	YES	YES	Preventative Intervention - Behavioural risk modification / Preventative Intervention - Physical/Biological risk modification	Schistosoma haematobium and HIV	These costs compare favorably with empirical measures of WSH provision in developing countries, indicating that integrated community-based intervention for reducing the transmission of S. haematobium is an economically attractive strategy for reducing schistosomiasis and HIV transmission in sub-Saharan Africa that would have a powerful impact on averting infections and saving lives.	Ndeffo Mbah ML, Kjetland EF, Atkins KE, Poolman EM, Orenstein EW, Meyers LA, Townsend JP, Galvani AP	USA / Norway and South Africa / USA	Academic
included	73	Health and economic impact of HPV 16/18 vaccination and cervical cancer screening in Eastern Africa	NHS EED	2012	International Journal of Cancer	http://www.crd.york.ac.uk/CRDWeb/ShowRecord.asp?ID=22012016376	Kenya / Mozambique / Tanzania / Uganda / Zimbabwe	NO	YES	Therapeutic Intervention - Vaccines / Diagnostic Tool - Non-Imaging	Cervical Cancer / Cervical infection	For both younger and older women, the most effective screening strategy was HPV DNA testing three times per lifetime. If the cost per vaccinated girl was between I$10 (I$2 per dose) and I$25 (I$5 per dose), vaccination followed by HPV DNA testing would save the most lives and would be considered good value for public health dollars. These results should be used to catalyze design and evaluation o…	Campos NG, Kim JJ, Castle PE, Ortendahl JD, O'Shea M, Diaz M, Goldie SJ	USA	Academic / Academic / Association
included	74	Economics of switching to second-line antiretroviral therapy with Lopinavir/ritonavir in Africa: estimates based on DART trial results and costs for Uganda and Kenya	NHS EED	2011	Value in Health	http://www.crd.york.ac.uk/CRDWeb/ShowRecord.asp?ID=22012000088	Kenya / Uganda	NO	YES	Therapeutic Intervention - Drug	HIV/AIDS	The estimates are clearly below the most stringent World Health Organization benchmark for cost-effectiveness for Kenya and within the acceptable range of cost-effectiveness for Uganda. Thus, the switch to second-line therapy with LPV/r in these countries appears to be a cost-effective use of resources	Simpson KN, Baran RW, Kirbach SE, Dietz B	USA	Academic / Private / Academic
included	75	Potential impact of reactive vaccination in controlling cholera outbreaks: An exploratory analysis using a Zimbabwean experience	NHS EED	2011	South African Medical Journal	http://www.crd.york.ac.uk/CRDWeb/ShowRecord.asp?ID=22011001676	Zimbabwe	YES	YES	Therapeutic Intervention - Vaccines	cholera	Reactive vaccination has the potential to be a costeffective measure to contain cholera outbreaks in countries at high risk. However, the feasibility of implementation should be further evaluated, and caution is warranted in extrapolating the findings to different settings in the absence of other in-depth studies.	Kim SY, Choi Y, Mason PR, Rusakaniko S, Goldie SJ	USA / USA / Zimbabwe	Academic
EXCLUDED (AUTHORS NOT FROM AFRICA)	76	An economic evaluation of thermostable vaccines in Cambodia, Ghana and Bangladesh	NHS EED	2007	Vaccine	http://www.crd.york.ac.uk/CRDWeb/ShowRecord.asp?ID=22007002075	Ghana	NO	NO	Support Tool - For Medical Intervention	No a particular disease	Single-dose presentations of thermostable vaccines are potentially cost-effective interventions to reduce childhood deaths and disability in low-resource settings in Asia and Africa.	Levin A, Levin C, Kristensen D, Matthias D	USA	NA / non-for-profit
included	77	Cost-effectiveness of HIV screening of blood donations in Accra (Ghana)	NHS EED	2008	Value in Health	http://www.crd.york.ac.uk/CRDWeb/ShowRecord.asp?ID=22008102121	Ghana	YES	YES	Diagnostic Tool - Non-Imaging	HIV/AIDS	Adding p24 antigen, MP-NAT, or ID-NAT to the current antibody screening cannot be regarded as a costeffective health-care intervention for Ghana.	Van Hulst M, Sagoe K W, Vermande J E, Van Der Schaaf I P, Van Der Tuuk Adriani W P, Torpey K, Ansah J, Mingle J A, Sibinga C T, Postma M J	Netherlands / Ghana / Netherlands	Academic and Research Center / Academic / Academic
EXCLUDED (AUTHORS NOT FROM AFRICA)	78	Web interface-supported transmission risk assessment and cost-effectiveness analysis of postdonation screening: a global model applied to Ghana, Thailand, and the Netherlands	NHS EED	2009	Transfusion	http://www.crd.york.ac.uk/CRDWeb/ShowRecord.asp?ID=22010000072	Ghana	NO	NO	Diagnostic Tool - Non-Imaging / Support Tool - For Medical Intervention	HIV/AIDS	The young transfusion recipient population of Ghana in combination with a high risk of viral transmission yields better cost-effectiveness for additional tests. The advanced age of the transfused population of the Netherlands and a small risk of viral transmission gives poor cost-effectiveness for more sensitive screening techniques. It was demonstrated that a global health economic model combine…	van Hulst M, Hubben GA, Sagoe KW, Promwong C, Permpikul P, Fongsatitkul L, Glynn DM, Sibinga CT, Postma MJ	Netherlands	Academic / Research Center / Private /
included	79	Cost-effectiveness analysis of unsafe abortion and alternative first-trimester pregnancy termination strategies in Nigeria and Ghana	NHS EED	2010	African Journal of Reproductive Health	http://www.crd.york.ac.uk/CRDWeb/ShowRecord.asp?ID=22011000505	Nigeria / Ghana	NO	YES	Therapeutic Intervention - Surgery	No a particular disease	Conversely, in Ghana, MA is the most cost-effective strategy, followed by clinic-based MVA if MA is not available. From a real world policy perspective, increasing access to safe abortion in favor over unsafe abortion is the single most important factor in saving lives and societal costs, and is more influential than the actual choice of safe abortion modality	Hu D, Grossman D, Levin C, Blanchard K, Adanu R, Goldie SJ	USA	Academic / non-for-profit organization / on-for-profit organization
EXCLUDED (AUTHORS NOT FROM AFRICA)	80	Cost-effectiveness of glaucoma interventions in Barbados and Ghana	NHS EED	2011	Optometry and Vision Science	http://www.crd.york.ac.uk/CRDWeb/ShowRecord.asp?ID=22011000773	Ghana	NO	NO	Therapeutic Intervention	Glaucoma	The social and economic burden of glaucoma is higher in more developed nations due to increased life expectancy, an older population age profile, and higher per capita gross domestic product. Likewise, lower mortality rates and higher per capita gross domestic product increase the relative cost-effectiveness of screening and treatment interventions intended to mitigate glaucoma burden.	Wittenborn JS, Rein DB	USA	Research Center
included	81	Coverage, adherence and costs of intermittent preventive treatment of malaria in children employing different delivery strategies in Jasikan, Ghana	NHS EED	2011	PLOS ONE	http://www.crd.york.ac.uk/CRDWeb/ShowRecord.asp?ID=22012014099	Ghana	YES	YES	Preventative Intervention - Nutrition and Chemoprevention	Malaria	VHWs achieve higher IPTc coverage and adherence at lower costs than facility-based nurses in Jasikan district, Ghana.	Patouillard E, Conteh L, Webster J, Kweku M, Chandramohan D, Greenwood B	UK (the fourth author is from Ghana)	Academic
included	82	Evaluation of cost-effectiveness of live oral pentavalent reassortant rotavirus vaccine introduction in Ghana	NHS EED	2012	Vaccine	http://www.crd.york.ac.uk/CRDWeb/ShowRecord.asp?ID=22012013731	Ghana	YES	YES	Therapeutic Intervention - Vaccines	Rotavirus (diarrheal)	RotaTeq vaccination for children under five in Ghana would be a highly cost-effective public health intervention. Ghanaian health officials should seek GAVI funding and evaluate how to maximize RotaTeq access.	Abbott C, Tiede B, Armah G, Mahmoud A	USA / Ghana	Academic
included	83	Costs, effects and cost-effectiveness of breast cancer control in Ghana	NHS EED	2012	Tropical Medicine and International Health	http://www.crd.york.ac.uk/CRDWeb/ShowRecord.asp?ID=22012030659	Ghana	YES	YES	Management of Diseases and Conditions	breast cancer	Both CBE screening and MAR seem economically attractive interventions. Given the uncertainty about the effectiveness of these interventions, only their phased introduction, carefully monitored and evaluated, is warranted. Moreover, their implementation is only meaningful if the capacity of basic cancer diagnostic, referral and treatment and possibly palliative services is simultaneously improved.	Zelle SG, Nyarko KM, Bosu WK, Aikins M, Niens LM, Lauer JA, Sepulveda CR, Hontelez JA, Baltussen R	Netherlands / Ghana / Ghana	Academic / Public / Academic
included	84	Cost-effectiveness analysis of introducing RDTs for malaria diagnosis as compared to microscopy and presumptive diagnosis in central and peripheral public health facilities in Ghana	NHS EED	2013	American Journal of Tropical Medicine and Hygiene	http://www.crd.york.ac.uk/CRDWeb/ShowRecord.asp?ID=22013040022	Ghana	YES	YES	Diagnostic Tool - Non-Imaging	Malaria	In the “microscopy setting” there was no advantage to replacing microscopy by RDT as the cost and proportion of correctly treated patients were similar. Results were sensitive to a decrease in the cost of RDTs, which cost GHS1.72 (US$1.17) per test at the time of the study and to improvements in adherence to negative tests that was just above 50% for both RDTs and microscopy.	Ansah E, Epokor M, Whitty CJ, Yeung S, Hansen KS	Ghana / Ghana / UK	Public / Public / Academic
included	85	Evaluation of a universal long-lasting insecticidal net (LLIN) distribution campaign in Ghana: cost effectiveness of distribution and hang-up activities	NHS EED	2014	Malaria Journal	http://www.crd.york.ac.uk/CRDWeb/ShowRecord.asp?ID=22014012306	Ghana	YES	YES	Preventative Intervention - other	Malaria	In this campaign, hang-up activities were estimated to be net saving if hang-up increased LLIN use by 10% or more. This suggests hang-up activities can make a LLIN campaign more cost-effective.	Smith Paintain L, Awini E, Addei S, Kukula V, Nikoi C, Sarpong D, Kwesi Manyei A, Yayemain D, Rusamira E, Agborson J, Baffoe-Wilmot A, Bart-Plange C, Chatterjee A, Gyapong M, Mangham-Jefferies L	UK / Ghana / Ghana	Academic / Research Center / Research Center
included	86	How inexpensive does an alcohol intervention in Kenya need to be in order to deliver favorable value by reducing HIV-related morbidity and mortality?	NHS EED	2014	Journal of Acquired Immune Deficiency Syndromes	http://www.crd.york.ac.uk/CRDWeb/ShowRecord.asp?ID=22014029123	Kenya	YES	YES	Preventative Intervention - Behavioural risk modification	HIV/AIDS	a substantial minority of new HIV infections in Kenya is likely to be attributable to unhealthy alcohol consumption, and a CBT-based intervention evaluated in a RCT would be costeffective at costs below $1 per person, offering favorable value compared with other resource-constrained decisions.	Braithwaite RS, Nucifora KA, Kessler J, Toohey C, Li L, Mentor SM, Uhler LM, Roberts MS, Galvani A, Bryant K	USA	Academic
included	87	Cost effectiveness of using surgery versus skeletal traction in management of femoral shaft fractures at Thika level 5 hospital, Kenya	NHS EED	2013	Pan African Medical Journal	http://www.crd.york.ac.uk/CRDWeb/ShowRecord.asp?ID=22013046065	Kenya	YES	YES	Therapeutic Intervention - Surgery	femoral shaft fractures	The data indicates a cost advantage of managing femoral shaft fracture by surgery compared to traction. Furthermore the longer hospital stay in the traction group is associated with more malunion, limb deformity and shortening.	Opondo E, Wanzala P, Makokha A	Kenya	Academic / Research Center / Academic
included	88	Cluster-randomized, crossover trial of the efficacy of plain soap and water versus alcohol-based rub for surgical hand preparation in a rural hospital in Kenya	NHS EED	2010	British Journal of Surgery	http://www.crd.york.ac.uk/CRDWeb/ShowRecord.asp?ID=22010002051	Kenya	YES	YES	Support Tool - For Medical Intervention	surgical-site infection (SSI)	There was no statistically or clinically significant difference in SSI rates, probably because more important factors contribute to SSI development. However, this study demonstrated the feasibility and affordability of alcohol-based handrubs for hand preparation before surgery in settings without continuous, clean water.	Nthumba PM, Stepita-Poenaru E, Poenaru D, Bird P, Allegranzi B, Pittet D, Harbarth S	Kenya	Research Center
included	89	Rotavirus disease burden and impact and cost-effectiveness of a rotavirus vaccination program in Kenya	NHS EED	2009	Journal of Infectious Diseases	http://www.crd.york.ac.uk/CRDWeb/ShowRecord.asp?ID=22010000101	Kenya	YES	YES	Therapeutic Intervention - Vaccines	Rotavirus (diarrheal)	A rotavirus vaccination program would reduce the substantial burden of rotavirus disease and the economic burden in Kenya.	Tate JE, Rheingans RD, O'Reilly CE, Obonyo B, Burton DC, Tornheim JA, Adazu K, Jaron P, Ochieng B, Kerin T, Calhoun L, Hamel M, Laserson K, Breiman RF, Feikin DR, Mintz ED, Widdowson MA	USA (the fourth author is from Kenya)	Public / Academic / Public
included	90	Costs and cost-effectiveness of delivering intermittent preventive treatment through schools in western Kenya	NHS EED	2008	Malaria Journal	http://www.crd.york.ac.uk/CRDWeb/ShowRecord.asp?ID=22008102021	Kenya	YES	YES	Preventative Intervention - Nutrition and Chemoprevention	Malaria	This study provides the first evidence that IPT administered by teachers is a cost-effective schoolbased malaria intervention and merits investigation in other settings.	Temperley M, Mueller D H, Njagi J K, Akhwale W, Clarke S E, Jukes M C, Estambale B B, Brooker S	UK / UK / Kenya	Academic / Academic / Public
included	91	Modeling the financial and clinical implications of malaria rapid diagnostic tests in the case-management of older children and adults in Kenya	NHS EED	2008	American Journal of Tropical Medicine and Hygiene	http://www.crd.york.ac.uk/CRDWeb/ShowRecord.asp?ID=22008101503	Kenya	YES	YES	Diagnostic Tool - Non-Imaging	Malaria	In areas of high malaria transmission, the results of this analysis are encouraging and support a policy of expanding the use of RDTs to support the roll-out of AL as the first-line malaria drug in Kenya. The clinical behavior actually observed in the study health facilities, although not yet optimal, could yield substantial cost savings and overall improvements in malaria treatment. The benefits…	Zurovac D, Larson B A, Skarbinski J, Slutsker L, Snow R W, Hamel M J	Kenya / USA / USA	Research Center / Academic / Public
included	92	Economic evaluation of delivering Haemophilus influenzae type b vaccine in routine immunization services in Kenya	NHS EED	2007	Bulletin of the World Health Organization	http://www.crd.york.ac.uk/CRDWeb/ShowRecord.asp?ID=22007001570	Kenya	YES	YES	Therapeutic Intervention - Vaccines	Haemophilus influenzae type b (Hib)	Hib vaccine is a highly cost-effective intervention in Kenya. It would be cost-saving if the vaccine price was below half of its present level.	Oloo Akumu A, English M, Scott J A, Griffiths U K	Kenya / Kenya / UK	Research Center
EXCLUDED (AUTHORS NOT FROM AFRICA)	93	Modelling cost-effectiveness of different vasectomy methods in India, Kenya, and Mexico	NHS EED	2007	Cost Effectiveness and Resource Allocation	http://www.crd.york.ac.uk/CRDWeb/ShowRecord.asp?ID=22007002204	Kenya	NO	NO				Seamans Y, Harner-Jay C M	USA	non-for profit
included	94	The role and performance of chest X-ray for the diagnosis of tuberculosis: a cost-effectiveness analysis in Nairobi, Kenya	NHS EED	2005	BMC Infectious Diseases	http://www.crd.york.ac.uk/CRDWeb/ShowRecord.asp?ID=22006006182	Kenya	NO	YES	Diagnostic Tool - Imaging	Tuberculosis	The diagnostic pathway ZN followed by CXR was more cost-effective as compared to CXR followed by ZN. When cost of treatment was also considered CXR followed by ZN became more cost-effective. The low specificity of chest X-ray remains a subject of concern. Depending whether CXR was performed on all suspects or on smear-negative suspects only, 22%-45% of patients labeled as "TB" had a negative cult…	van Cleeff M R, Kivihya Ndugga L E, Meme H, Odhiambo J A, Klatser P R	Netherlands / Kenya / Kenya	international non-profit organization / Research Center / Research Center
included	95	System dynamics model of cervical cancer vaccination and screening interventions in Kenya	NHS EED	2014	Cost Effectiveness and Resource Allocation	http://www.crd.york.ac.uk/CRDWeb/ShowRecord.asp?AccessionNumber=22015002004&UserID=0#.VQhjKYtF3wo	Kenya	YES	YES	Diagnostic Tool - Non-Imaging / Therapeutic Intervention - Vaccines	Human Papillomavirus	Kenya as a country should consider adoption of secondary /catch up vaccination as an immediate measure to curb cervical cancer followed by primary vaccination of pre-adolescent girls. Screening should be a complementary measure(s). This model provides a policy decision support vehicle that can allow for choice between different interventions based on their expected outcomes. It also allows modifi…	Kivuti-Bitok LW, McDonnell G, Abdul R, Pokhariyal GP	Kenya / Australia / Canada	Academic
included	96	Cost-utility analysis of antihypertensive medications in Nigeria: a decision analysis	NHS EED	2013	Cost Effectiveness and Resource Allocation	http://www.crd.york.ac.uk/CRDWeb/ShowRecord.asp?ID=22013009001	Nigeria	YES	YES	Therapeutic Intervention - Drug	hypertension	result of this study showed that thiazide diuretic followed by calcium channel blocker could be a feasible strategy in order to ensure that patients in Nigeria with hypertension are better controlled.	Ekwunife OI, Okafor CE, Ezenduka CC, Udeogaranya PO	Nigeria	Academic
included	97	The potential cost and benefits of raltegravir in simplified second-line therapy among HIV infected patients in Nigeria and South Africa	NHS EED	2013	PLOS ONE	http://www.crd.york.ac.uk/CRDWeb/ShowRecord.asp?ID=22013011064	Nigeria / South Africa	NO	YES	Management of Diseases and Conditions	HIV/AIDS	The combination of raltegravir and ritonavir-boosted lopinavir was projected to be cost-effective in South Africa. However, at its current price, it is unlikely to be cost-effective in Nigeria.	Schneider K, Nwizu C, Kaplan R, Anderson J, Wilson DP, Emery S, Cooper DA, Boyd MA	Australia / USA / South Africa	Academic / Academic / not-for-profit
EXCLUDED (AUTHORS NOT FROM AFRICA)	98	Use of the non-pneumatic anti-shock garment (nasg) for life-threatening obstetric hemorrhage: a cost-effectiveness analysis in Egypt and Nigeria	NHS EED	2013	PLOS ONE	http://www.crd.york.ac.uk/CRDWeb/ShowRecord.asp?ID=22013019525	Nigeria	NO	NO		obstetric hemorrhage		Sutherland T, Downing J, Miller S, Bishai DM, Butrick E, Fathalla MM, Mourad-Youssif M, Ojengbede O, Nsima D, Kahn JG	USA	Academic
included	99	Assessing health and economic outcomes of interventions to reduce pregnancy-related mortality in Nigeria	NHS EED	2012	BMC Public Health	http://www.crd.york.ac.uk/CRDWeb/ShowRecord.asp?ID=22013020242	Nigeria	YES	YES	Health and Social Care Services	Maternal mortality	Early intensive efforts to improve family planning and control of fertility choices, accompanied by a stepwise effort to scale-up capacity for integrated maternal health services over several years, will save lives and provide equal or greater value than many public health interventions we consider among the most cost-effective (e.g., childhood immunization).	Erim DO, Resch SC, Goldie SJ	USA	Academic
included	100	Cost-effectiveness analysis of three leprosy case detection methods in northern Nigeria	NHS EED	2012	PLOS Neglected Tropical Diseases	http://www.crd.york.ac.uk/CRDWeb/ShowRecord.asp?ID=22012038549	Nigeria	YES	YES	Management of Diseases and Conditions	leprosy	Complementing routine practice with household contact examination is the most cost-effective approach to identify new leprosy cases and we recommend that, depending on acceptability and feasibility, this intervention is introduced for improved case detection in Northern Nigeria.	Ezenduka C, Post E, John S, Suraj A, Namadi A, Onwujekwe O	Nigeria / Netherlands / Nigeria	Academic / Research Center /
included	101	Cost effectiveness of three drugs for the treatment of S. aureus infections in Nigeria	NHS EED	2012	International Journal of Clinical Pharmacy	http://www.crd.york.ac.uk/CRDWeb/ShowRecord.asp?ID=22012039502	Nigeria	YES	YES	Therapeutic Intervention - Drug	S. aureus infections	Ciprofloxacin should be used as first-line-treatment of S aureus in Lagos as it will lead to significant cost savings in the treatment of S. aureus infections.	Suleiman IA, Bamiro BS, Tayo F	Nigeria	Academic
included	102	Outcome of an intervention to improve the quality of private sector provision of postabortion care in northern Nigeria	NHS EED	2012	International Journal of Gynecology and Obstetrics	http://www.crd.york.ac.uk/CRDWeb/ShowRecord.asp?ID=22012034084	Nigeria	YES	YES	Health and Social Care Services	postabortion care	Building the capacity of private medical providers can reduce maternal morbidity and mortality associated with induced abortion in northern Nigeria.	Ogu R, Okonofua F, Hammed A, Okpokunu E, Mairiga A, Bako A, Abass T, Garba D, Alani A, Agholor K	Nigeria	Research Center and Academic / Research Center and Academic / Research Center
included	103	Cost-effectiveness analysis of rapid diagnostic test, microscopy and syndromic approach in the diagnosis of malaria in Nigeria: implications for scaling-up deployment of ACT	NHS EED	2009	Malaria Journal	http://www.crd.york.ac.uk/CRDWeb/ShowRecord.asp?ID=22010000354	Nigeria	YES	YES	Diagnostic Tool - Non-Imaging	Malaria	RDT is cost-effective when compared to other diagnostic strategies for malaria treatment at malaria prevalence of 43.1% and, therefore, a very good strategy for diagnosis of malaria in Nigeria. There is opportunity for cost savings if rapid diagnostic tests are introduced inhealth facilities in Nigeria for case management of malaria.	Uzochukwu BS, Obikeze EN, Onwujekwe OE, Onoka CA, Griffiths UK	Nigeria	Academic
included	104	Costs and performance of early hearing detection programmes in Lagos, Nigeria	NHS EED	2009	Transactions of the Royal Society of Tropical Medicine and Hygiene	http://www.crd.york.ac.uk/CRDWeb/ShowRecord.asp?ID=22009100553	Nigeria	YES	YES	Diagnostic Tool - Non-Imaging	ermanent congenital and early-onset hearing loss (PCEHL)	Community-based universal screening of infants during routine immunisation clinics appears to be the most cost-effective model for early detection of PCEHL in low-income countries.	Olusanya B O, Emokpae A, Renner J K, Wirz S L	Nigeria and UK / Nigeria / Nigeria	Academic / Research Institute / Academic
included	105	Cost-effectiveness of anti-retroviral therapy at a district hospital in southern Ethiopia	NHS EED	2009	Cost Effectiveness and Resource Allocation	http://www.crd.york.ac.uk/CRDWeb/ShowRecord.asp?ID=22009103241	Ethiopia	YES	YES	Therapeutic Intervention - Drug	HIV/AIDS	The undiscounted and discounted incremental costs per LYG from introducing ART were less than the per capita GDP threshold at the base year. Thus, ART could be regarded as cost-effective in a district hospital setting in Ethiopia.	Bikilla AD, Jerene D, Robberstad B, Lindtjorn B	Norway and Ethiopia / Ethiopia / Ethiopia	Academic / Research Center / cademic
included	106	Cost and cost-effectiveness of treating smear-positive tuberculosis by health extension workers in Ethiopia: an ancillary cost-effectiveness analysis of community randomized trial	NHS EED	2010	PLOS ONE	http://www.crd.york.ac.uk/CRDWeb/ShowRecord.asp?ID=22010000903	Ethiopia	YES	YES	Health and Social Care Services	Tuberculosis	Community-based treatment by HEWs costs only 39% of what treatment by general health workers costs for similar outcomes. Involving HEWs in TB treatment is a cost effective treatment alternative to the health service, to the patients and the family. There is an economic and public health reason to consider involving HEWs in TB treatment in Ethiopia. However, community-based treatment requires init…	Datiko DG, Lindtjorn B	Norway / Ethiopia	Academic and Public / Public
included	107	Cost-effectiveness analysis of clinical specialist outreach as compared to referral system in Ethiopia: an economic evaluation	NHS EED	2010	Cost Effectiveness and Resource Allocation	http://www.crd.york.ac.uk/CRDWeb/ShowRecord.asp?ID=22010001702	Ethiopia	YES	YES	Health and Social Care Services	No a particular disease	Clinical specialist outreach is a cost effective and cost saving way of spending clinical specialists' time as compared to provision of similar services through referral system.	Kifle YA, Nigatu TH	Ethiopia	Academic / Research Center
included	108	The cost of child health days: a case study of Ethiopa's enhanced outreach strategy (EOS)	NHS EED	2008	Health Policy and Planning	http://www.crd.york.ac.uk/CRDWeb/ShowRecord.asp?AccessionNumber=22008101167&UserID=0#.VQr6I4tF3wo	Ethiopia	YES	YES	Preventative Intervention - Nutrition and Chemoprevention	No a particular disease	The average cost per life saved was US$228 and the cost per DALY averted was equivalent to 6% of per capita GDP (US$9), making the EOS cost-effective, according to WHO criteria. UNICEF played a key role in initiating the EOS and finances 68% of costs, raising concern about the programme’s long-term sustainability.	Fiedler J L, Chuko T	USA / Ethiopia	non-for-profit
included	109	Cost-effectiveness of three malaria treatment strategies in rural Tigray, Ethiopia where both Plasmodium falciparum and Plasmodium vivax co-dominate	NHS EED	2011	Cost Effectiveness and Resource Allocation	http://www.crd.york.ac.uk/CRDWeb/ShowRecord.asp?ID=22011000578	Ethiopia	YES	YES	Management of Diseases and Conditions	Malaria	This study showed that the parascreen pan/pf based strategy should be the preferred option to be used at health post level in rural Tigray. This finding is relevant nationwide as the entire country’s alaria epidemiology is similar to the study area.	Lemma H, San Sebastian M, Lofgren C, Barnabas G	Ethiopia / Sweden	Public / Academic
included	110	Cost effectiveness of community-based and in-patient therapeutic feeding programs to treat severe acute malnutrition in Ethiopia	NHS EED	2012	Cost Effectiveness and Resource Allocation	http://www.crd.york.ac.uk/CRDWeb/ShowRecord.asp?ID=22012016000	Ethiopia	YES	YES	Health and Social Care Services	Acute malnutrition	CTC was found to be relatively more cost effective than TFC in this setting. This indicates that CTC is a viable approach on just economic grounds in addition to other benefits such improved access, sustainability and appropriateness documented elsewhere. If costs of RUTF can be reduced such as through local production the CTC costs per child can be further reduced as RUTF constitutes the highest…	Tekeste A, Wondafrash M, Azene G, Deribe K	Ethiopia	Academic
EXCLUDED (AUTHORS NOT FROM AFRICA)	111	Public finance of rotavirus vaccination in India and Ethiopia: an extended cost-effectiveness analysis	NHS EED	2013	Vaccine	http://www.crd.york.ac.uk/CRDWeb/ShowRecord.asp?ID=22013031913	Ethiopia	NO	NO		Rotavirus (diarrheal)		Verguet S, Murphy S, Anderson B, Johansson KA, Glass R, Rheingans R	USA	Academic
included	112	Assessing the costs and effects of antiretroviral therapy task shifting from physicians to other health professionals in Ethiopia	NHS EED	2014	Journal of Acquired Immune Deficiency Syndromes	http://www.crd.york.ac.uk/CRDWeb/ShowRecord.asp?ID=22014019388	Ethiopia	YES	YES	Health and Social Care Services	HIV/AIDS	Shifting the handling of both severe drug reactions and antiretroviral drug regimen changes from physicians to other clinical officers is not associated with a significant change in the 2- year treatment success rate or the costs of ART care. As an observational study, these results are tentative, and more research is needed in determining the optimal patterns of task shifting.	Johns B, Asfaw E, Wong W, Bekele A, Minior T, Kebede A, Palen J	UK / Ethiopia / UK	Private / Research Center / Private
included	113	Evaluation of the Ethiopian millennium rural initiative: impact on mortality and cost-effectiveness	NHS EED	2013	PLOS ONE	http://www.crd.york.ac.uk/CRDWeb/ShowRecord.asp?ID=22013052136	Ethiopia	YES	YES	Health and Social Care Services	No a particular disease	A systems-based approach to improving primary care in low-income settings can have transformational impact on lives saved and be cost-effective.	Curry LA, Byam P, Linnander E, Andersson KM, Abebe Y, Zerihun A, Thompson JW, Bradley EH	USA (the fifth author is from Ethiopia)	Academic
included	114	Costs and cost-effectiveness of pediatric inguinal hernia repair in Uganda	NHS EED	2015	World Journal of Surgery	http://www.crd.york.ac.uk/CRDWeb/ShowRecord.asp?ID=22014037825	Uganda	YES	YES	Therapeutic Intervention - Surgery	pediatric inguinal hernia	Elective PIHR is highly cost-effective for the treatment and prevention of complications of hernia disease even in low-resource settings. PIHR should be prioritized in LMICs alongside other cost-effective interventions.	Eeson G, Birabwa-Male D, Pennington M, Blair GK	Canada / Uganda / UK	Academic
included	115	Cost-effectiveness analysis of a voucher scheme combined with obstetrical quality improvements: quasi experimental results from Uganda	NHS EED	2015	Health Policy and Planning	http://www.crd.york.ac.uk/CRDWeb/ShowRecord.asp?ID=22014001351	Uganda	YES	YES	Health and Social Care Services	Maternal mortality	Maternal mortality, institutional deliveries, maternity services, obstetric care, health financing, financial incentives, vouchers, demand-side financing, supplyside financing, health system strengthening, cost-effectiveness, economic evaluation, quasi-experimental trial, Uganda, Africa	Alfonso YN, Bishai D, Bua J, Mutebi A, Mayora C, Ekirapa-Kiracho E	USA / USA / Uganda	Academic
included	116	Modelling the potential impact and cost of scaling-up male circumcision in resource poor settings: a case of Uganda	NHS EED	2013	African Journal of AIDS Research	http://www.crd.york.ac.uk/CRDWeb/ShowRecord.asp?ID=22013045560	Uganda	YES	YES	Preventative Intervention - Physical/Biological risk modification	HIV/AIDS	scale up of MC will reduce HIV prevalence and incidence substantially and it would be highly cost effective. The government should mobilise funding to meet high MC targets that would deliver the desired reduction in prevalence and incidence in a short period of time.	Tumwesigyea NM, Wabwire-Mangena F, Bagendaa D, Ssengoobab F, Opioc A, Nalwaddab CK, Bollinger L, Stoverd J	Uganda	Academic
included	117	Reach and cost-effectiveness of the prepex device for safe male circumcision in Uganda	NHS EED	2013	PLOS ONE	http://www.crd.york.ac.uk/CRDWeb/ShowRecord.asp?ID=22013022405	Uganda	YES	YES	Therapeutic Intervention - Surgery	HIV/AIDS	PrePex is a viable SMC tool for scale-up with unrivalled potential for superior reach, however national targets can only be met with effective demand creation and availability of trained human resource.	Duffy K, Galukande M, Wooding N, Dea M, Coutinho A	Uganda	Research Center / Research Center Academic
included	118	Cost effectiveness of a pharmacy-only refill program in a large urban HIV/AIDS clinic in Uganda.	NHS EED	2011	PLOS ONE	http://www.crd.york.ac.uk/CRDWeb/ShowRecord.asp?ID=22011000751	Uganda	YES	YES	Health and Social Care Services	HIV/AIDS	The PRP is more cost-effective than the standard of care. Similar task-shifting programs might help large HIV/AIDS clinics in Uganda and other low-income countries to cope with increasing numbers of patients seeking care.	Babigumira JB, Castelnuovo B, Stergachis A, Kiragga A, Shaefer P, Lamorde M, Kambugu A, Muwanga A, Garrison LP	USA / Uganda / USA	Academic
included	119	Costs and effects of two public sector delivery channels for long-lasting insecticidal nets in Uganda	NHS EED	2010	Malaria Journal	http://www.crd.york.ac.uk/CRDWeb/ShowRecord.asp?ID=22010001205	Uganda	YES	YES	Health and Social Care Services	Malaria	Targeted campaigns and routine ANC services can both achieve high LLIN retention and use among the target population. The comparatively higher economic cost of delivery through ANC facilities was at least partially due to the relatively short time this system had been in existence. Further studies comparing the cost of well-established ANC delivery with LLIN campaigns and other delivery channels …	Kolaczinski JH, Kolaczinski K, Kyabayinze D, Strachan D, Temperley M, Wijayanandana N, Kilian A	Uganda and UK / Uganda / Uganda	non-for-profit / Academic
included	120	The cost effectiveness of home-based provision of antiretroviral therapy in rural Uganda	NHS EED	2009	Applied Health Economics and Health Policy	http://www.crd.york.ac.uk/CRDWeb/ShowRecord.asp?ID=22010000389	Uganda	YES	YES	Therapeutic Intervention - Drug	HIV/AIDS	A home-based HAART program in rural Africa was more cost-effective than most previous estimates for facility-based HAART programs, but remained less cost-effective than many HIV prevention and care interventions, including cotrimoxazole prophylaxis.	Marseille E, Kahn JG, Pitter C, Bunnell R, Epalatai W, Jawe E, Were W, Mermin J	USA	Private / Academic / non-for-profit
included	121	Intermittent preventive treatment of malaria in pregnancy: the incremental cost-effectiveness of a new delivery system in Uganda	NHS EED	2008	Transactions of the Royal Society of Tropical Medicine and Hygiene	http://www.crd.york.ac.uk/CRDWeb/ShowRecord.asp?ID=22008101004	Uganda	YES	YES	Health and Social Care Services	Malaria	Community-based delivery increased access and adherence to IPTp and was cost-effective	Mbonye A K, Hansen K S, Bygbjerg I C, Magnussen P	Uganda / Denmark / Denmark	Public / Academic / Academic
included	122	Cost-utility of tuberculosis prevention among HIV-infected adults in Kampala, Uganda	NHS EED	2007	International Journal of Tuberculosis and Lung Disease	http://www.crd.york.ac.uk/CRDWeb/ShowRecord.asp?ID=22007001493	Uganda	YES	YES	Preventative Intervention - Nutrition and Chemoprevention	tuberculosis / HIV	The provision of IPT for HIV-infected persons was cost-effective. The use of TST screening prior to IPT reduced costs per QALY gained, but saved fewer overall QALYs.	Shrestha R K, Mugisha B, Bunnell R, Mermin J, Odeke R, Madra P, Hitimana-Lukanika C, Adatu-Engwau F, Blandford J M	USA / Uganda / Uganda	Public / non-for-profit / USA Public agency
included	123	The impact of male circumcision on HIV incidence and cost per infection prevented: a stochastic simulation model from Rakai, Uganda	NHS EED	2007	AIDS	http://www.crd.york.ac.uk/CRDWeb/ShowRecord.asp?ID=22007000832	Uganda	YES	YES	Preventative Intervention - Physical/Biological risk modification	HIV/AIDS	Male circumcision could have substantial impact on the HIV epidemic and provide a cost-effective prevention strategy if benefits are not countered by behavioral disinhibition.	Gray R H, Li X, Kigozi G, Serwadda D, Nalugoda F, Watya S, Reynolds S J, Wawer M	USA / USA / Uganda	Academic / Academic / Research Center
included	124	The benefits or otherwise of managing malaria cases with or without laboratory diagnosis: the experience in a district hospital in Ghana	NHS EED	2013	PLOS ONE	http://www.crd.york.ac.uk/CRDWeb/ShowRecord.asp?AccessionNumber=22013012828&UserID=0	Ghana	YES	YES	Management of Diseases and Conditions	Malaria	Over-diagnosis of malaria was prevalent in Kintampo during the period of the study. Though the use of RDT for diagnosis of malaria might have improved the quality of care for children, it appeared not to have a cost saving effect on the management of children with suspected malaria. Further research may be needed to confirm this.	Osei-Kwakye K, Asante KP, Mahama E, Apanga S, Owusu R, Kwara E, Adjei G, Abokyi L, Yeetey E, Dosoo DK, Punguyire D, Owusu-Agyei S	Ghana	Research Center
included	125	Cost effectiveness of seasonal intermittent preventive treatment using amodiaquine and artesunate or sulphadoxine-pyrimethamine in Ghanaian children	NHS EED	2010	PLOS ONE	http://www.crd.york.ac.uk/CRDWeb/ShowRecord.asp?AccessionNumber=22010001900&UserID=0	Ghana	YES	YES	Preventative Intervention - Physical/Biological risk modification	Malaria	We demonstrate how cost-effective IPTc is using three different drug regimens and the possibilities for reducing costs further if the intervention was to be scaled up to the district level. The need for effective training, drug delivery channels and supervision to support a strong network of community based volunteers is emphasised.	Conteh L, Patouillard E, Kweku M, Legood R, Greenwood B, Chandramohan D	the UK / the UK / Ghana and the UK	Academic
included	126	Is home management of fevers a cost-effective way of reducing under-five mortality in Africa? The case of a rural Ghanaian District	NHS EED	2012	Tropical Medicine and International Health	http://www.crd.york.ac.uk/CRDWeb/ShowRecord.asp?AccessionNumber=22012030668&UserID=0	Ghana	YES	YES	Management of Diseases and Conditions	Malaria	Both AAQ and AAQ + AMX approaches were cost-effective, each averting one DALY at less than the standard US$ 150 threshold recommended by the World Health Organisation. However, AAQ was more cost-effective. Home management of under-five fevers in rural settings is cost-effective in reducing under-five mortality.	Nonvignon J, Chinbuah MA, Gyapong M, Abbey M, Awini E, Gyapong JO, Aikins M	Ghana	Academic/ Research Center / Research Center
included	127	Modeling optimal cervical cancer prevention strategies in Nigeria	NHS EED	2014	BMC Cancer	http://www.crd.york.ac.uk/CRDWeb/ShowRecord.asp?AccessionNumber=22014026644&UserID=0	Nigeria	YES	YES	Preventative Intervention - Physical/Biological risk modification	Cervical Cancer / Cervical infection	The results of the optimization model indicate that, in Nigeria, the most efficient allocation of a limited budget would be to invest in both vaccination and screening with a 3-dose vaccination schedule, and in vaccination alone before implementing a screening program with a 2-dose vaccination schedule.	Demarteau N, Morhason-Bello IO, Akinwunmi B, Adewole IF	Belgium / Nigeria / Nigeria	Private / Private / Academic
included	128	Willingness to pay and benefit-cost analysis of modern contraceptives in Nigeria	NHS EED	2013	International Journal of Gynecology and Obstetrics	http://www.crd.york.ac.uk/CRDWeb/ShowRecord.asp?AccessionNumber=22013026065&UserID=0	Nigeria	YES	YES	Other	No a particular disease	The benefits of providing contraceptives outweigh the costs, making public sector investment worthwhile. The median WTP amounts, which reflect the ideal upper thresholds for pricing, indicate that cost recovery is feasible for all contraceptives.	Onwujekwe O, Ogbonna C, Ibe O, Uzochukwu B	Nigeria	Academic / Academic / United Nations
included	129	Cost comparison of microscopy vs. empiric treatment for malaria in southwestern Nigeria: a prospective study	NHS EED	2010	Malaria Journal	http://www.crd.york.ac.uk/CRDWeb/ShowRecord.asp?AccessionNumber=22011000384&UserID=0	Nigeria	YES	YES	Management of Diseases and Conditions	Malaria	Empiric treatment of all suspected cases of malaria was cheaper than only treating those who had microscopy-confirmed diagnoses of malaria, even though the majority of patients suspected to have malaria were negative via microscopy. One can acknowledge that giving many malaria-uninfected Nigerians anti-malarial drugs is undesirable for both their personal health and fears of drug resistance with …	Parikh R, Amole I, Tarpley M, Gbadero D, Davidson M, Vermund SH	USA/ Nigeria / USA	Academic

## Sheet: Co-authors
ID	45			84			56			43			105			63 / 66			37			29			23			117			96			100			10			107			95			119			36
729	Economic analysis of the diagnosis of smear-negative pulmonary tuberculosis in South Africa: incorporation of a new rapid test, FASTPlaqueTB, into the diagnostic algorithm			Cost-effectiveness analysis of introducing RDTs for malaria diagnosis as compared to microscopy and presumptive diagnosis in central and peripheral public health facilities in Ghana			Effectiveness and cost of facility-based integrated management of childhood illness (IMCI) in Tanzania			Cost-effectiveness of highly active antiretroviral therapy in South Africa			Cost-effectiveness of anti-retroviral therapy at a district hospital in southern Ethiopia			Cost-effectiveness analysis of the available strategies for diagnosing malaria in outpatient clinics in Zambia			Cost of childhood diarrhoea in rural South Africa: exploring cost-effectiveness of universal zinc supplementation			Procalcitonin and C-reactive protein as predictors of blood culture positivity among hospitalised children with severe pneumonia in Mozambique			Introducing auto-disable syringes to the national immunization programme in Madagascar			Reach and cost-effectiveness of the prepex device for safe male circumcision in Uganda			Cost-utility analysis of antihypertensive medications in Nigeria: a decision analysis			Cost-effectiveness analysis of three leprosy case detection methods in northern Nigeria			Cost and cost-effectiveness of switching from d4T or AZT to a TDF-based first-line regimen in a resource-limited setting in rural Lesotho			Cost-effectiveness analysis of clinical specialist outreach as compared to referral system in Ethiopia: an economic evaluation			System dynamics model of cervical cancer vaccination and screening interventions in Kenya			Costs and effects of two public sector delivery channels for long-lasting insecticidal nets in Uganda			A novel Markov model projecting costs and outcomes of providing antiretroviral therapy to public patients in private practices versus public clinics in South Africa
Author1	Heidi Albert			Evelyn K. Ansah	Evelyn Ansah		Joanna RM Armstrong Schellenberg	Armstrong Schellenberg J		Motasim Badri			Asfaw Demissie Bikilla			Pascalina Chanda			Meera K Chhagana	Chhagana MK		Núria Díez-Padrisa			Paul K. Drain			Kevin Duffy	exclude from the sample??		Obinna Ikechukwu Ekwunife	Ekwunife O I		Charles Ezenduka			Guillaume Jouquet			Yibeltal A Kifle			Lucy W Kivuti-Bitok			Jan H Kolaczinski			Rory Leisegang
Country1	South Africa			Ghana / the UK			Tanzania / the UK / Switzerland			South Africa			Ethiopia / Norway			Zambia			South Africa			Mozambique / Spain			Madagascar	USA in most of the articles		Uganda	.		Nigeria			Nigeria			Lesotho			Ethiopia			Kenya			Uganda / the UK			South Africa
Number of Articles			12			15			39			53			2			11			10			11			27			11			14			5			8			1			3			26
	Muzaffar R	Pakistan	1	Agyepong IA	Ghana	2	Roca-Feltrer A	the UK	1	Abulkhair O	Saudi Arabia	1	Jerene D	Norway	2	Castillo-Riquelme M	South Africa	1	Barth-Jaeggi T	Switzerland	1	Castellanos LG	USA	1	Baeten JM	USA	1	Galukande M	Uganda	4	Okoye MO	Nigeria	1	Ogbonna BO	Nigeria	1	Parker LA	Switzerland	1	Nigatu TH.	Ethiopia	1	Kipturgo MK	Kenya	1	Ashton RA	Uganda	4	Court R
	Scott L	South Africa	1	Narh-Bana S	Ghana	2	Rowe AK	USA	1	Al Alwan I	Saudi Arabia	2				Barnes KI	South Africa	1	Uwemedimo OT	USA	1	O'Callaghan-Gordo C	Mozambique and Spain	2	Barry M.	Cuba - USA	1	Rahmouni HW	USA	1	Okafor CE	Nigeria	1	Okonta MJ	Nigeria	1	Jobanputra K	Swaziland	1				Pokhariyal GP	Kenya	1	Brooker S	Kenya	2	Maartens G
	Mole R	South Africa	1	Malenga G	Malawi	1	Webster J	the UK	1	Aldrees TM	Saudi Arabia	1				Hamainza B	Zambia	3	Van den Broeck J	Norway	3	Bassat Q	Mozambique and Spain	5	Behforouz HL	USA	1	Howell K	USA	1	Oreh C	Nigeria	1	Okafor CE	Nigeria	1	Ponsar F	Belgium	1				McDonnell G	Kenya	1	Clements AC	Australia	1	Boyles TH
	Boehme CC	Switzerland	1	Kayode GA	Netherlands	3	Abdulla S	Tanzania	1	Chin A	Saudi Arabia	1				Hamer DH	USA	1	Mellins CA	USA	1	Ruth Aguilar	Spain	1	Cherniak WA	Canada	1	Tendulkar SA	the UK	1	Ubaka CM	Nigeria	1	Post E	The Netherlands	1	Bygrave H	Lesotho	4							Edwards T	the UK	1	Decloedt E
	Sohn H	Switzerland	1	Chandler CI	the Uk	1	Adam T	Switzerland	1	Dave JA	South Africa	1				Hawela M	Zambia	1	Kauchali S	South Africa	3	Boadas-Vaello P	Spain	1	Cohen GM	USA	1	Spierer DK	USA	2	Aguwa CN	Nigeria	3	Ichoku H	Nigeria	1	Ford N	South Africa	1							Finn TP	South Sudan	1	Nachega JB
	Barnard M	Switzerland	1	Reynolds J	the UK	2	Alonso PL	Spain	5	de Villiers L	South Africa	1				Masiye F	Zambia	1	Jeena PM	South Africa	1	Soler-Martín C	Spain	1	Evert J	USA	1	Nassr Nassr	Germany	1	Ukwe CV	Nigeria	2													Hanson K	the UK	1	Cleary S
	Nakiyingi L	Uganda	2	Powell-Jackson T	The UK	1	Bryce J	Switzerland	1	Desrosiers T	USA	1				Pearce RJ	the UK	1							Gounder L	South Africa	1	Pappalardi M	USA	1	Ezenduka CC	Nigeria	1													Hope A	South Sudan	1
	Ademun PJ	Uganda	1	Epokor M	The UK	1	de Francisco A	Gambia	1	Dheda K	South Africa	5				Sipilanyambe N	Zambia	1							Halperin DT	Swaziland	1				Njilele AC	Nigeria	1													Kabatereine NB	Uganda	2
	Yukari Manabe	Uganda	1	Whitty CJ	The UK	2	Drakeley C	Tanzania and the UK	1	Heckmann JM	South Africa	1				Zurovac D	Kenya	1							Hickey AJ	USA	1				Igboeli NU	Nigeria	1													Kolaczinski K	Uganda	1
	Bwanga F	Uganda	1				Drakeley CJ	Tanzania and Netherlands	1	Holmes CB	USA	1													Holmes KK	USA	2				Udeogaranya PO	Nigeria	1													Mueller YK	France, Switzerland, the UK	1
	Yoon C	USA	1				Galindo CM	Spain and Tanzania	1	Kenyon C	South Africa	2													Hyle EP	USA	1				Okonta JM	Nigeria	1													Muhammad N	Pakistan	1
							Gouws E	Switzerland	1	Khan A	Saudi Arabia and Japan	1													Kupka R	USA	2																			Ojok N	Uganda	1
							Greenwood BM	Gambia	1	Lawn SD	South Africa and the UK	6													Losina E	USA	4																			Reithinger R	the UK and USA	3
							Gross K	Switzerland	1	Maritz J	South Africa	1													Moosa Y	South Africa	1																			Robinson E	South Sudan	2
							Hanson K	the UK	1	Mayosi BM	South Africa	1													Mosam A	South Africa	1																			Sturrock HJ	the UK and South Sudan	2
							Korenromp EL	Switzerland	1	Mutyaba AK	South Africa	1													Ndeffo Mbah ML	USA	1																			Tadesse Z	Ethiopia	1
							Lengeler C	Switzerland	2	Ntsekhe M	South Africa	2													Nelson CM	USA	1																			Worku DT	Uganda	1
							Lindsay SW	Gambia	3	Ntusi NB	South Africa	3													Primack A	USA	1
							Maokola W	Tanzania	1	O'Kane D	the UK	1													Ralaivao JS	Madagascar	1
							Marchant T	the UK	4	Orrell C	South Africa	1													Rhatigan JJ.	USA	1
							Miller JE	the UK	1	Pietersen E	South Africa	1													Robine M	USA	1
							Mrisho M	Tanzania	1	Pooran A	the UK	1													Smith JS	USA	1
							Nathan R	Tanzania	1	Rooney PJ	the UK	1
							Penfold S	the UK	1	Shaboodien G	South Africa and the UK	2
							Picard J	the UK	1	Shean K	South Africa	1
							Quigley MA	the UK	1	Sinxadi PZ	South Africa	1
							Shirima K	Tanzania	1	Syed FF	USA	2
							Victora CG	Brazil	1	Tipping B	South Africa	1
							Willey BA	the UK	1	van Zyl-Smit RN	South Africa	1
										Watkins DA	South Africa	1
										Welschinger R	South Africa	1
										Wilson D	South Africa	2
										Maartens G	South Africa	1
										Cleary S	South Africa	1
										Bekker LG	South Africa	1
										Wood R.	South Africa	1
[truncated: 68 more columns]

## Sheet: longlat
http://techslides.com/list-of-countries-and-capitals
Row Labels	Average of Latitute1	Average of Longitude1
Australia	-35.282	149.129
Belgium	50.8371	4.3676
Botswana	-24.657	25.9089
Canada	45.4235	-75.6979
Congo	-4.3369	15.3271
Ethiopia	9.0084	38.7575
France	48.8567	2.351
Germany	52.5235	13.4115
Ghana	5.5401	-0.2074
Ireland	53.3441	-6.2675
Italy	41.8955	12.4823
Jamaica	17.9927	-76.792
Japan	35.6785	139.682
Kenya	-1.2762	36.7965
Lesotho	-29.2976	27.4854
Madagascar	-18.9201	47.5237
Malawi	-13.9899	33.7703
Mozambique	-25.9686	32.5804
Netherlands	52.3738	4.891
Nigeria	9.058	7.4891
Norway	59.9138	10.7387
Pakistan	33.6751	73.0946
Saudi Arabia	24.6748	46.6977
South Africa	-25.7463	28.1876
Spain	40.4167	-3.7033
Sudan	4.8496	31.6046
Swaziland	-26.3186	31.141
Sweden	59.3328	18.0645
Switzerland	46.948	7.4481
Tanzania	-6.167	35.7497
Uganda	0.3133	32.5714
the UK	51.5004	-0.1262
USA	38.8921	-77.0241
Gambia	13.45	-16.5667
Brazil	-15.7833	-47.9167
Benin	6.48333	2.61667
South Sudan	4.85	31.6167
Denmark	55.6667	12.5833
Ireland	53.3441	-6.2675
Gabon	0.383333	9.45
Zambia	15.4145	28.2809

## Sheet: Links longandlatt
ID	IDLINK	Africa Author	Africa Author Country1	Africa Author Country1 lat	Africa Author Country1 long	Africa Author Country1 longMAS	Africa Author Country2	Africa Author Country2 lat	Africa Author Country2 long	Africa Author Country3	Co-author	Co-author Country	Type of relationship	Co-author Country lat	Co-author Country long	Co-author Country2	Co-author Country3	Total of articles per Author	Number of Articles per co-author	Co-authors that appears also in the author list	par of countries	Number of Articles that link the Same Countries	linewidth
5	1	Taraz Samandari	Botswana	-24.657	25.9089	29.9089	USA	38.8921	-77.0241		Agizew TB	USA	4	38.8921	-77.0241			26	3		BotswanaUSA	20	3		0.142857
5	2	Taraz Samandari	Botswana	-24.657	25.9089	29.9089	USA	38.8921	-77.0241		Bell BP	USA	4	38.8921	-77.0241			26	1		BotswanaUSA	20	3		0.285714
5	3	Taraz Samandari	Botswana	-24.657	25.9089	29.9089	USA	38.8921	-77.0241		Bishai D	USA	4	38.8921	-77.0241			26	1		BotswanaUSA	20	3		0.428571
5	4	Taraz Samandari	Botswana	-24.657	25.9089	29.9089	USA	38.8921	-77.0241		Chaisson LH	USA	4	38.8921	-77.0241			26	1		BotswanaUSA	20	3		0.571429
5	5	Taraz Samandari	Botswana	-24.657	25.9089	29.9089	USA	38.8921	-77.0241		Chaves SS	USA	4	38.8921	-77.0241			26	1		BotswanaUSA	20	3		0.714286
5	6	Taraz Samandari	Botswana	-24.657	25.9089	29.9089	USA	38.8921	-77.0241		Fiore AE	USA	4	38.8921	-77.0241			26	1		BotswanaUSA	20	3		0.857143
5	7	Taraz Samandari	Botswana	-24.657	25.9089	29.9089	USA	38.8921	-77.0241		Gust DA	USA	4	38.8921	-77.0241			26	1		BotswanaUSA	20	3		1
5	8	Taraz Samandari	Botswana	-24.657	25.9089	29.9089	USA	38.8921	-77.0241		Jindani A	The UK	4	51.5004	-0.1262			26	1		BotswanaThe UK	1	1
5	9	Taraz Samandari	Botswana	-24.657	25.9089	29.9089	USA	38.8921	-77.0241		Kerkhoff AD	South Africa	3	-25.7463	28.1876	USA		26	2		BotswanaSouth Africa	2	1
5	10	Taraz Samandari	Botswana	-24.657	25.9089	29.9089	USA	38.8921	-77.0241		Malakmadze N	USA	4	38.8921	-77.0241			26	1		BotswanaUSA	20	3
5	11	Taraz Samandari	Botswana	-24.657	25.9089	29.9089	USA	38.8921	-77.0241		Mdodo R	USA	4	38.8921	-77.0241			26	1		BotswanaUSA	20	3
5	12	Taraz Samandari	Botswana	-24.657	25.9089	29.9089	USA	38.8921	-77.0241		Mosimaneotsile B	Botswana	2	-24.657	25.9089			26	1		BotswanaBotswana	3	1
5	13	Taraz Samandari	Botswana	-24.657	25.9089	29.9089	USA	38.8921	-77.0241		Taylor AW	USA	4	38.8921	-77.0241			26	1		BotswanaUSA	20	3
5	14	Taraz Samandari	Botswana	-24.657	25.9089	29.9089	USA	38.8921	-77.0241		Tedla Z	Botswana	2	-24.657	25.9089			26	1		BotswanaBotswana	3	1
5	15	Taraz Samandari	Botswana	-24.657	25.9089	29.9089	USA	38.8921	-77.0241		Wasley A	USA	4	38.8921	-77.0241			26	1		BotswanaUSA	20	3
5	16	Taraz Samandari	Botswana	-24.657	25.9089	29.9089	USA	38.8921	-77.0241		Menzies HJ	USA	4	38.8921	-77.0241			26	1		BotswanaUSA	20	3
5	17	Taraz Samandari	Botswana	-24.657	25.9089	29.9089	USA	38.8921	-77.0241		Sibanda T	Botswana	2	-24.657	25.9089			26	1		BotswanaBotswana	3	1
5	18	Taraz Samandari	Botswana	-24.657	25.9089	29.9089	USA	38.8921	-77.0241		Gammino VM	USA	4	38.8921	-77.0241			26	1		BotswanaUSA	20	3
5	19	Taraz Samandari	Botswana	-24.657	25.9089	29.9089	USA	38.8921	-77.0241		Oeltmann JE	USA	4	38.8921	-77.0241			26	1		BotswanaUSA	20	3
5	20	Taraz Samandari	Botswana	-24.657	25.9089	29.9089	USA	38.8921	-77.0241		Kotloff KL	USA	4	38.8921	-77.0241			26	2		BotswanaUSA	20	3
5	21	Taraz Samandari	Botswana	-24.657	25.9089	29.9089	USA	38.8921	-77.0241		Brown JL.	USA	4	38.8921	-77.0241			26	1		BotswanaUSA	20	3
5	22	Taraz Samandari	Botswana	-24.657	25.9089	29.9089	USA	38.8921	-77.0241		Brodbeck RM	USA	4	38.8921	-77.0241			26	1		BotswanaUSA	20	3
9	23	Junior R Matangila	Congo	-4.3369	15.3271	19.3271	Belgium	50.8371	4.3676		Doua JY	Belgium	4	50.8371	4.3676			2	1		CongoBelgium	1	1
9	24	Junior R Matangila	Congo	-4.3369	15.3271	19.3271	Belgium	50.8371	4.3676		Lufuluabo J	Congo	2	-4.3369	15.3271			2	1		CongoCongo	1	1
10	25	Guillaume Jouquet	Lesotho	-29.2976	27.4854	31.4854	0				Bygrave H	Lesotho	2	-29.2976	27.4854			8	4		LesothoLesotho	4	1
10	26	Guillaume Jouquet	Lesotho	-29.2976	27.4854	31.4854	0				Ford N	South Africa	3	-25.7463	28.1876			8	1		LesothoSouth Africa	1	1
10	27	Guillaume Jouquet	Lesotho	-29.2976	27.4854	31.4854	0				Jobanputra K	Swaziland	3	-26.3186	31.141			8	1		LesothoSwaziland	1	1
10	28	Guillaume Jouquet	Lesotho	-29.2976	27.4854	31.4854	0				Parker LA	Switzerland	4	46.948	7.4481			8	1		LesothoSwitzerland	1	1
10	29	Guillaume Jouquet	Lesotho	-29.2976	27.4854	31.4854	0				Ponsar F	Belgium	4	50.8371	4.3676			8	1		LesothoBelgium	1	1
21	30	Dylo F Pemba	Malawi	-13.9899	33.7703	37.7703	0				Bandason E	Malawi	2	-13.9899	33.7703			2	1		MalawiMalawi	2	1
21	31	Dylo F Pemba	Malawi	-13.9899	33.7703	37.7703	0				Namangale J.	Malawi	2	-13.9899	33.7703			2	1		MalawiMalawi	2	1
23	32	Paul K. Drain	Madagascar	-18.9201	47.5237	51.5237	0				Baeten JM	USA	4	38.8921	-77.0241			27	1		MadagascarUSA	21	4
23	33	Paul K. Drain	Madagascar	-18.9201	47.5237	51.5237	0				Barry M.	USA	4	38.8921	-77.0241	Cuba		27	1		MadagascarUSA	21	4
23	34	Paul K. Drain	Madagascar	-18.9201	47.5237	51.5237	0				Behforouz HL	USA	4	38.8921	-77.0241			27	1		MadagascarUSA	21	4
23	35	Paul K. Drain	Madagascar	-18.9201	47.5237	51.5237	0				Cherniak WA	Canada	4	45.4235	-75.6979			27	1		MadagascarCanada	1	1
23	36	Paul K. Drain	Madagascar	-18.9201	47.5237	51.5237	0				Cohen GM	USA	4	38.8921	-77.0241			27	1		MadagascarUSA	21	4
23	37	Paul K. Drain	Madagascar	-18.9201	47.5237	51.5237	0				Evert J	USA	4	38.8921	-77.0241			27	1		MadagascarUSA	21	4
23	38	Paul K. Drain	Madagascar	-18.9201	47.5237	51.5237	0				Gounder L	South Africa	3	-25.7463	28.1876			27	1		MadagascarSouth Africa	3	1
23	39	Paul K. Drain	Madagascar	-18.9201	47.5237	51.5237	0				Halperin DT	Swaziland	3	-26.3186	31.141			27	1		MadagascarSwaziland	1	1
23	40	Paul K. Drain	Madagascar	-18.9201	47.5237	51.5237	0				Hickey AJ	USA	4	38.8921	-77.0241			27	1		MadagascarUSA	21	4
23	41	Paul K. Drain	Madagascar	-18.9201	47.5237	51.5237	0				Holmes KK	USA	4	38.8921	-77.0241			27	2		MadagascarUSA	21	4
23	42	Paul K. Drain	Madagascar	-18.9201	47.5237	51.5237	0				Hyle EP	USA	4	38.8921	-77.0241			27	1		MadagascarUSA	21	4
23	43	Paul K. Drain	Madagascar	-18.9201	47.5237	51.5237	0				Kupka R	USA	4	38.8921	-77.0241			27	2		MadagascarUSA	21	4
23	44	Paul K. Drain	Madagascar	-18.9201	47.5237	51.5237	0				Losina E	USA	4	38.8921	-77.0241			27	4		MadagascarUSA	21	4
23	45	Paul K. Drain	Madagascar	-18.9201	47.5237	51.5237	0				Moosa Y	South Africa	3	-25.7463	28.1876			27	1		MadagascarSouth Africa	3	1
23	46	Paul K. Drain	Madagascar	-18.9201	47.5237	51.5237	0				Mosam A	South Africa	3	-25.7463	28.1876			27	1		MadagascarSouth Africa	3	1
23	47	Paul K. Drain	Madagascar	-18.9201	47.5237	51.5237	0				Ndeffo Mbah ML	USA	4	38.8921	-77.0241			27	1		MadagascarUSA	21	4
23	48	Paul K. Drain	Madagascar	-18.9201	47.5237	51.5237	0				Nelson CM	USA	4	38.8921	-77.0241			27	1		MadagascarUSA	21	4
23	49	Paul K. Drain	Madagascar	-18.9201	47.5237	51.5237	0				Primack A	USA	4	38.8921	-77.0241			27	1		MadagascarUSA	21	4
23	50	Paul K. Drain	Madagascar	-18.9201	47.5237	51.5237	0				Ralaivao JS	Madagascar	2	-18.9201	47.5237			27	1		MadagascarMadagascar	1	1
23	51	Paul K. Drain	Madagascar	-18.9201	47.5237	51.5237	0				Rhatigan JJ.	USA	4	38.8921	-77.0241			27	1		MadagascarUSA	21	4
23	52	Paul K. Drain	Madagascar	-18.9201	47.5237	51.5237	0				Robine M	USA	4	38.8921	-77.0241			27	1		MadagascarUSA	21	4
23	53	Paul K. Drain	Madagascar	-18.9201	47.5237	51.5237	0				Smith JS	USA	4	38.8921	-77.0241			27	1		MadagascarUSA	21	4
29	54	Núria Díez-Padrisa	Mozambique	-25.9686	32.5804	36.5804	Spain	40.4167	-3.7033		Castellanos LG	USA	4	38.8921	-77.0241			11	1		MozambiqueUSA	1	1
29	55	Núria Díez-Padrisa	Mozambique	-25.9686	32.5804	36.5804	Spain	40.4167	-3.7033		O'Callaghan-Gordo C	Mozambique	2	-25.9686	32.5804	Spain		11	2		MozambiqueMozambique	7	2
29	56	Núria Díez-Padrisa	Mozambique	-25.9686	32.5804	36.5804	Spain	40.4167	-3.7033		Bassat Q	Mozambique	2	-25.9686	32.5804	Spain		11	5		MozambiqueMozambique	7	2
29	57	Núria Díez-Padrisa	Mozambique	-25.9686	32.5804	36.5804	Spain	40.4167	-3.7033		Ruth Aguilar	Spain	4	40.4167	-3.7033			11	1		MozambiqueSpain	3	1
29	58	Núria Díez-Padrisa	Mozambique	-25.9686	32.5804	36.5804	Spain	40.4167	-3.7033		Boadas-Vaello P	Spain	4	40.4167	-3.7033			11	1		MozambiqueSpain	3	1
29	59	Núria Díez-Padrisa	Mozambique	-25.9686	32.5804	36.5804	Spain	40.4167	-3.7033		Soler-Martín C	Spain	4	40.4167	-3.7033			11	1		MozambiqueSpain	3	1
31	60	Stephen Thompson	South Africa	-25.7463	28.1876	32.1876	Ireland	53.3441	-6.2675		Amin AN	USA	4	38.8921	-77.0241			41	5		South AfricaUSA	53	5
31	61	Stephen Thompson	South Africa	-25.7463	28.1876	32.1876	Ireland	53.3441	-6.2675		Brand S	the UK	4	51.5004	-0.1262			41	1		South Africathe UK	29	4
31	62	Stephen Thompson	South Africa	-25.7463	28.1876	32.1876	Ireland	53.3441	-6.2675		Chan KK	the UK	4	51.5004	-0.1262			41	1		South Africathe UK	29	4
31	63	Stephen Thompson	South Africa	-25.7463	28.1876	32.1876	Ireland	53.3441	-6.2675		Chintagumpala MM	USA	4	38.8921	-77.0241			41	1		South AfricaUSA	53	5
31	64	Stephen Thompson	South Africa	-25.7463	28.1876	32.1876	Ireland	53.3441	-6.2675		Delaney G	Australia	4	-35.282	149.129			41	1		South AfricaAustralia	2	1
31	65	Stephen Thompson	South Africa	-25.7463	28.1876	32.1876	Ireland	53.3441	-6.2675		Dessi J	the UK	4	51.5004	-0.1262			41	2		South Africathe UK	29	4
31	66	Stephen Thompson	South Africa	-25.7463	28.1876	32.1876	Ireland	53.3441	-6.2675		Dybicz SB	USA	4	38.8921	-77.0241			41	1		South AfricaUSA	53	5
31	67	Stephen Thompson	South Africa	-25.7463	28.1876	32.1876	Ireland	53.3441	-6.2675		Fawcett MC	the UK	4	51.5004	-0.1262			41	2		South Africathe UK	29	4
31	68	Stephen Thompson	South Africa	-25.7463	28.1876	32.1876	Ireland	53.3441	-6.2675		Hamann W	the UK	4	51.5004	-0.1262			41	1		South Africathe UK	29	4
31	69	Stephen Thompson	South Africa	-25.7463	28.1876	32.1876	Ireland	53.3441	-6.2675		Hwang SY	Australia	4	-35.282	149.129			41	1		South AfricaAustralia	2	1
31	70	Stephen Thompson	South Africa	-25.7463	28.1876	32.1876	Ireland	53.3441	-6.2675		Kaiser F	the UK	4	51.5004	-0.1262			41	1		South Africathe UK	29	4
31	71	Stephen Thompson	South Africa	-25.7463	28.1876	32.1876	Ireland	53.3441	-6.2675		Kannan H	USA	4	38.8921	-77.0241			41	1		South AfricaUSA	53	5
31	72	Stephen Thompson	South Africa	-25.7463	28.1876	32.1876	Ireland	53.3441	-6.2675		Kyle K.	USA	4	38.8921	-77.0241			41	1		South AfricaUSA	53	5
31	73	Stephen Thompson	South Africa	-25.7463	28.1876	32.1876	Ireland	53.3441	-6.2675		Lai JY	the UK	4	51.5004	-0.1262			41	1		South Africathe UK	29	4
31	74	Stephen Thompson	South Africa	-25.7463	28.1876	32.1876	Ireland	53.3441	-6.2675		Laundy D	the UK	4	51.5004	-0.1262			41	1		South Africathe UK	29	4
31	75	Stephen Thompson	South Africa	-25.7463	28.1876	32.1876	Ireland	53.3441	-6.2675		Lunn G	the UK	4	51.5004	-0.1262			41	1		South Africathe UK	29	4
31	76	Stephen Thompson	South Africa	-25.7463	28.1876	32.1876	Ireland	53.3441	-6.2675		Naidoo K	South Africa	2	-25.7463	28.1876			41	1		South AfricaSouth Africa	84	6
31	77	Stephen Thompson	South Africa	-25.7463	28.1876	32.1876	Ireland	53.3441	-6.2675		Nguyen NP	USA	4	38.8921	-77.0241			41	1		South AfricaUSA	53	5
31	78	Stephen Thompson	South Africa	-25.7463	28.1876	32.1876	Ireland	53.3441	-6.2675		Pandya N	USA	4	38.8921	-77.0241			41	1		South AfricaUSA	53	5
31	79	Stephen Thompson	South Africa	-25.7463	28.1876	32.1876	Ireland	53.3441	-6.2675		Penney G	the UK	4	51.5004	-0.1262			41	2		South Africathe UK	29	4
31	80	Stephen Thompson	South Africa	-25.7463	28.1876	32.1876	Ireland	53.3441	-6.2675		Pervez A	the UK	4	51.5004	-0.1262			41	1		South Africathe UK	29	4
31	81	Stephen Thompson	South Africa	-25.7463	28.1876	32.1876	Ireland	53.3441	-6.2675		Self AC	the UK	4	51.5004	-0.1262			41	1		South Africathe UK	29	4
31	82	Stephen Thompson	South Africa	-25.7463	28.1876	32.1876	Ireland	53.3441	-6.2675		Self CH	the UK	4	51.5004	-0.1262			41	2		South Africathe UK	29	4
31	83	Stephen Thompson	South Africa	-25.7463	28.1876	32.1876	Ireland	53.3441	-6.2675		Shanks EJ	the UK	4	51.5004	-0.1262			41	1		South Africathe UK	29	4
31	84	Stephen Thompson	South Africa	-25.7463	28.1876	32.1876	Ireland	53.3441	-6.2675		Spinks D	the UK	4	51.5004	-0.1262			41	2		South Africathe UK	29	4
31	85	Stephen Thompson	South Africa	-25.7463	28.1876	32.1876	Ireland	53.3441	-6.2675		Stewart R	the UK	4	51.5004	-0.1262			41	1		South Africathe UK	29	4
31	86	Stephen Thompson	South Africa	-25.7463	28.1876	32.1876	Ireland	53.3441	-6.2675		Torrie LS	the UK	4	51.5004	-0.1262			41	1		South Africathe UK	29	4
31	87	Stephen Thompson	South Africa	-25.7463	28.1876	32.1876	Ireland	53.3441	-6.2675		Tozawa T	the UK	4	51.5004	-0.1262			41	1		South Africathe UK	29	4
31	88	Stephen Thompson	South Africa	-25.7463	28.1876	32.1876	Ireland	53.3441	-6.2675		Urbaniak MD	the UK	4	51.5004	-0.1262			41	1		South Africathe UK	29	4
31	89	Stephen Thompson	South Africa	-25.7463	28.1876	32.1876	Ireland	53.3441	-6.2675		Wyllie S	the UK	4	51.5004	-0.1262			41	1		South Africathe UK	29	4
31	90	Stephen Thompson	South Africa	-25.7463	28.1876	32.1876	Ireland	53.3441	-6.2675		Zaky W	USA	4	38.8921	-77.0241			41	1		South AfricaUSA	53	5
31	91	Stephen Thompson	South Africa	-25.7463	28.1876	32.1876	Ireland	53.3441	-6.2675		Zhang Q	the UK	4	51.5004	-0.1262			41	1		South Africathe UK	29	4
33	92	Charlotte M Zikusooka	South Africa	-25.7463	28.1876	32.1876	0				Eisele TP	USA	4	38.8921	-77.0241			6	1		South AfricaUSA	53	5
33	93	Charlotte M Zikusooka	South Africa	-25.7463	28.1876	32.1876	0				Kyomuhang RL	Uganda	3	0.3133	32.5714			6	2		South AfricaUganda	9	2
33	94	Charlotte M Zikusooka	South Africa	-25.7463	28.1876	32.1876	0				Luboga S	Uganda	3	0.3133	32.5714			6	1		South AfricaUganda	9	2
33	95	Charlotte M Zikusooka	South Africa	-25.7463	28.1876	32.1876	0				McIntyre D	South Africa	2	-25.7463	28.1876			6	1		South AfricaSouth Africa	84	6
33	96	Charlotte M Zikusooka	South Africa	-25.7463	28.1876	32.1876	0				Orem JN	Uganda	3	0.3133	32.5714			6	1		South AfricaUganda	9	2
36	97	Rory Leisegang	South Africa	-25.7463	28.1876	32.1876	0				Boyles TH	South Africa	2	-25.7463	28.1876			7	1		South AfricaSouth Africa	84	6
36	98	Rory Leisegang	South Africa	-25.7463	28.1876	32.1876	0				Cleary S	South Africa	2	-25.7463	28.1876			7	1		South AfricaSouth Africa	84	6
36	99	Rory Leisegang	South Africa	-25.7463	28.1876	32.1876	0				Court R	South Africa	2	-25.7463	28.1876			7	1		South AfricaSouth Africa	84	6
36	100	Rory Leisegang	South Africa	-25.7463	28.1876	32.1876	0				Decloedt E	South Africa	2	-25.7463	28.1876			7	1		South AfricaSouth Africa	84	6
36	101	Rory Leisegang	South Africa	-25.7463	28.1876	32.1876	0				Maartens G	South Africa	2	-25.7463	28.1876			7	2		South AfricaSouth Africa	84	6
36	102	Rory Leisegang	South Africa	-25.7463	28.1876	32.1876	0				Nachega JB	USA	4	38.8921	-77.0241			7	1		South AfricaUSA	53	5
37	103	Meera K Chhagana	South Africa	-25.7463	28.1876	32.1876	0				Barth-Jaeggi T	Switzerland	4	46.948	7.4481			10	1		South AfricaSwitzerland	4	1
37	104	Meera K Chhagana	South Africa	-25.7463	28.1876	32.1876	0				Kauchali S	South Africa	2	-25.7463	28.1876			10	3		South AfricaSouth Africa	84	6
37	105	Meera K Chhagana	South Africa	-25.7463	28.1876	32.1876	0				Mellins CA	USA	4	38.8921	-77.0241			10	1		South AfricaUSA	53	5
37	106	Meera K Chhagana	South Africa	-25.7463	28.1876	32.1876	0				Uwemedimo OT	USA	4	38.8921	-77.0241			10	1		South AfricaUSA	53	5
37	107	Meera K Chhagana	South Africa	-25.7463	28.1876	32.1876	0				Jeena PM	South Africa	2	-25.7463	28.1876			10	1		South AfricaSouth Africa	84	6
37	108	Meera K Chhagana	South Africa	-25.7463	28.1876	32.1876	0				Van den Broeck J	Norway	4	59.9138	10.7387			10	3		South AfricaNorway	3	1
38	109	Kathryn Schnippel	South Africa	-25.7463	28.1876	32.1876	0				Cassim N	South Africa	2	-25.7463	28.1876			11	1		South AfricaSouth Africa	84	6
38	110	Kathryn Schnippel	South Africa	-25.7463	28.1876	32.1876	0				Larson B	USA	4	38.8921	-77.0241			11	3		South AfricaUSA	53	5
38	111	Kathryn Schnippel	South Africa	-25.7463	28.1876	32.1876	0				Long L	South Africa	2	-25.7463	28.1876			11	1		South AfricaSouth Africa	84	6
38	112	Kathryn Schnippel	South Africa	-25.7463	28.1876	32.1876	0				Meyer-Rath G	South Africa	2	-25.7463	28.1876	USA		11	3		South AfricaSouth Africa	84	6
38	113	Kathryn Schnippel	South Africa	-25.7463	28.1876	32.1876	0				Rosen S	South Africa	2	-25.7463	28.1876	USA		11	1	x	South AfricaSouth Africa	84	6
38	114	Kathryn Schnippel	South Africa	-25.7463	28.1876	32.1876	0				Siakotos AN	USA	4	38.8921	-77.0241			11	1		South AfricaUSA	53	5
38	115	Kathryn Schnippel	South Africa	-25.7463	28.1876	32.1876	0				Van Rie A	USA	4	38.8921	-77.0241			11	1		South AfricaUSA	53	5
43	116	Motasim Badri	South Africa	-25.7463	28.1876	32.1876	0				Abulkhair O	Saudi Arabia	4	24.6748	46.6977			53	1		South AfricaSaudi Arabia	6	2
43	117	Motasim Badri	South Africa	-25.7463	28.1876	32.1876	0				Al Alwan I	Saudi Arabia	4	24.6748	46.6977			53	2		South AfricaSaudi Arabia	6	2
43	118	Motasim Badri	South Africa	-25.7463	28.1876	32.1876	0				Aldrees TM	Saudi Arabia	4	24.6748	46.6977			53	1		South AfricaSaudi Arabia	6	2
43	119	Motasim Badri	South Africa	-25.7463	28.1876	32.1876	0				Bekker LG	South Africa	2	-25.7463	28.1876			53	1		South AfricaSouth Africa	84	6
43	120	Motasim Badri	South Africa	-25.7463	28.1876	32.1876	0				Chin A	Saudi Arabia	4	24.6748	46.6977			53	1		South AfricaSaudi Arabia	6	2
43	121	Motasim Badri	South Africa	-25.7463	28.1876	32.1876	0				Cleary S	South Africa	2	-25.7463	28.1876			53	1		South AfricaSouth Africa	84	6
43	122	Motasim Badri	South Africa	-25.7463	28.1876	32.1876	0				Dave JA	South Africa	2	-25.7463	28.1876			53	1		South AfricaSouth Africa	84	6
43	123	Motasim Badri	South Africa	-25.7463	28.1876	32.1876	0				de Villiers L	South Africa	2	-25.7463	28.1876			53	1		South AfricaSouth Africa	84	6
43	124	Motasim Badri	South Africa	-25.7463	28.1876	32.1876	0				Desrosiers T	USA	4	38.8921	-77.0241			53	1		South AfricaUSA	53	5
43	125	Motasim Badri	South Africa	-25.7463	28.1876	32.1876	0				Dheda K	South Africa	2	-25.7463	28.1876			53	5		South AfricaSouth Africa	84	6
43	126	Motasim Badri	South Africa	-25.7463	28.1876	32.1876	0				Heckmann JM	South Africa	2	-25.7463	28.1876			53	1		South AfricaSouth Africa	84	6
43	127	Motasim Badri	South Africa	-25.7463	28.1876	32.1876	0				Holmes CB	USA	4	38.8921	-77.0241			53	1		South AfricaUSA	53	5
43	128	Motasim Badri	South Africa	-25.7463	28.1876	32.1876	0				Kenyon C	South Africa	2	-25.7463	28.1876			53	2		South AfricaSouth Africa	84	6
43	129	Motasim Badri	South Africa	-25.7463	28.1876	32.1876	0				Khan A	Saudi Arabia	4	24.6748	46.6977	Japan		53	1		South AfricaSaudi Arabia	6	2
43	130	Motasim Badri	South Africa	-25.7463	28.1876	32.1876	0				Lawn SD	South Africa	2	-25.7463	28.1876	the UK		53	6		South AfricaSouth Africa	84	6
43	131	Motasim Badri	South Africa	-25.7463	28.1876	32.1876	0				Maartens G	South Africa	2	-25.7463	28.1876			53	1		South AfricaSouth Africa	84	6
43	132	Motasim Badri	South Africa	-25.7463	28.1876	32.1876	0				Maritz J	South Africa	2	-25.7463	28.1876			53	1		South AfricaSouth Africa	84	6
43	133	Motasim Badri	South Africa	-25.7463	28.1876	32.1876	0				Mayosi BM	South Africa	2	-25.7463	28.1876			53	1		South AfricaSouth Africa	84	6
43	134	Motasim Badri	South Africa	-25.7463	28.1876	32.1876	0				Mutyaba AK	South Africa	2	-25.7463	28.1876			53	1		South AfricaSouth Africa	84	6
43	135	Motasim Badri	South Africa	-25.7463	28.1876	32.1876	0				Ntsekhe M	South Africa	2	-25.7463	28.1876			53	2		South AfricaSouth Africa	84	6
43	136	Motasim Badri	South Africa	-25.7463	28.1876	32.1876	0				Ntusi NB	South Africa	2	-25.7463	28.1876			53	3		South AfricaSouth Africa	84	6
43	137	Motasim Badri	South Africa	-25.7463	28.1876	32.1876	0				O'Kane D	the UK	4	51.5004	-0.1262			53	1		South Africathe UK	29	4
43	138	Motasim Badri	South Africa	-25.7463	28.1876	32.1876	0				Orrell C	South Africa	2	-25.7463	28.1876			53	1		South AfricaSouth Africa	84	6
43	139	Motasim Badri	South Africa	-25.7463	28.1876	32.1876	0				Pietersen E	South Africa	2	-25.7463	28.1876			53	1		South AfricaSouth Africa	84	6
43	140	Motasim Badri	South Africa	-25.7463	28.1876	32.1876	0				Pooran A	the UK	4	51.5004	-0.1262			53	1		South Africathe UK	29	4
43	141	Motasim Badri	South Africa	-25.7463	28.1876	32.1876	0				Rooney PJ	the UK	4	51.5004	-0.1262			53	1		South Africathe UK	29	4
43	142	Motasim Badri	South Africa	-25.7463	28.1876	32.1876	0				Shaboodien G	South Africa	2	-25.7463	28.1876	the UK		53	2		South AfricaSouth Africa	84	6
43	143	Motasim Badri	South Africa	-25.7463	28.1876	32.1876	0				Shean K	South Africa	2	-25.7463	28.1876			53	1		South AfricaSouth Africa	84	6
43	144	Motasim Badri	South Africa	-25.7463	28.1876	32.1876	0				Sinxadi PZ	South Africa	2	-25.7463	28.1876			53	1		South AfricaSouth Africa	84	6
43	145	Motasim Badri	South Africa	-25.7463	28.1876	32.1876	0				Syed FF	USA	4	38.8921	-77.0241			53	2		South AfricaUSA	53	5
43	146	Motasim Badri	South Africa	-25.7463	28.1876	32.1876	0				Tipping B	South Africa	2	-25.7463	28.1876			53	1		South AfricaSouth Africa	84	6
43	147	Motasim Badri	South Africa	-25.7463	28.1876	32.1876	0				van Zyl-Smit RN	South Africa	2	-25.7463	28.1876			53	1		South AfricaSouth Africa	84	6
43	148	Motasim Badri	South Africa	-25.7463	28.1876	32.1876	0				Watkins DA	South Africa	2	-25.7463	28.1876			53	1		South AfricaSouth Africa	84	6
43	149	Motasim Badri	South Africa	-25.7463	28.1876	32.1876	0				Welschinger R	South Africa	2	-25.7463	28.1876			53	1		South AfricaSouth Africa	84	6
43	150	Motasim Badri	South Africa	-25.7463	28.1876	32.1876	0				Wilson D	South Africa	2	-25.7463	28.1876			53	2		South AfricaSouth Africa	84	6
43	151	Motasim Badri	South Africa	-25.7463	28.1876	32.1876	0				Wood R.	South Africa	2	-25.7463	28.1876			53	1		South AfricaSouth Africa	84	6
45	152	Heidi Albert	South Africa	-25.7463	28.1876	32.1876	0				Ademun PJ	Uganda	3	0.3133	32.5714			12	1		South AfricaUganda	9	2
45	153	Heidi Albert	South Africa	-25.7463	28.1876	32.1876	0				Barnard M	Switzerland	4	46.948	7.4481			12	1		South AfricaSwitzerland	4	1
45	154	Heidi Albert	South Africa	-25.7463	28.1876	32.1876	0				Boehme CC	Switzerland	4	46.948	7.4481			12	1		South AfricaSwitzerland	4	1
45	155	Heidi Albert	South Africa	-25.7463	28.1876	32.1876	0				Bwanga F	Uganda	3	0.3133	32.5714			12	1		South AfricaUganda	9	2
45	156	Heidi Albert	South Africa	-25.7463	28.1876	32.1876	0				Mole R	South Africa	2	-25.7463	28.1876			12	1		South AfricaSouth Africa	84	6
45	157	Heidi Albert	South Africa	-25.7463	28.1876	32.1876	0				Muzaffar R	Pakistan	4	33.6751	73.0946			12	1		South AfricaPakistan	1	1
45	158	Heidi Albert	South Africa	-25.7463	28.1876	32.1876	0				Nakiyingi L	Uganda	3	0.3133	32.5714			12	2		South AfricaUganda	9	2
45	159	Heidi Albert	South Africa	-25.7463	28.1876	32.1876	0				Scott L	South Africa	2	-25.7463	28.1876			12	1		South AfricaSouth Africa	84	6
45	160	Heidi Albert	South Africa	-25.7463	28.1876	32.1876	0				Sohn H	Switzerland	4	46.948	7.4481			12	1		South AfricaSwitzerland	4	1
45	161	Heidi Albert	South Africa	-25.7463	28.1876	32.1876	0				Yoon C	USA	4	38.8921	-77.0241			12	1		South AfricaUSA	53	5
45	162	Heidi Albert	South Africa	-25.7463	28.1876	32.1876	0				Yukari Manabe	Uganda	3	0.3133	32.5714			12	1		South AfricaUganda	9	2
48	163	Amani T Mori	Tanzania	-6.167	35.7497	39.7497	Norway	59.9138	10.7387		Ngalesoni F	Tanzania	2	-6.167	35.7497	Norway		6	1		TanzaniaTanzania	13	3
48	164	Amani T Mori	Tanzania	-6.167	35.7497	39.7497	Norway	59.9138	10.7387		Kaale EA	Tanzania	2	-6.167	35.7497			6	3		TanzaniaTanzania	13	3
48	165	Amani T Mori	Tanzania	-6.167	35.7497	39.7497	Norway	59.9138	10.7387		Owenya J.	Tanzania	2	-6.167	35.7497			6	1		TanzaniaTanzania	13	3
48	166	Amani T Mori	Tanzania	-6.167	35.7497	39.7497	Norway	59.9138	10.7387		Robberstad B.	Norway	4	59.9138	10.7387			6	1		TanzaniaNorway	1	1
56	167	Joanna RM Armstrong Schellenberg	Tanzania	-6.167	35.7497	39.7497	the UK	51.5004	-0.1262	Switzerland	Roca-Feltrer A	the UK	4	51.5004	-0.1262			39	1		Tanzaniathe UK	12	3
56	168	Joanna RM Armstrong Schellenberg	Tanzania	-6.167	35.7497	39.7497	the UK	51.5004	-0.1262	Switzerland	Rowe AK	USA	4	38.8921	-77.0241			39	1		TanzaniaUSA	1	1
56	169	Joanna RM Armstrong Schellenberg	Tanzania	-6.167	35.7497	39.7497	the UK	51.5004	-0.1262	Switzerland	Webster J	the UK	4	51.5004	-0.1262			39	1		Tanzaniathe UK	12	3
56	170	Joanna RM Armstrong Schellenberg	Tanzania	-6.167	35.7497	39.7497	the UK	51.5004	-0.1262	Switzerland	Abdulla S	Tanzania	2	-6.167	35.7497			39	1		TanzaniaTanzania	13	3
56	171	Joanna RM Armstrong Schellenberg	Tanzania	-6.167	35.7497	39.7497	the UK	51.5004	-0.1262	Switzerland	Adam T	Switzerland	4	46.948	7.4481			39	1		TanzaniaSwitzerland	7	2
56	172	Joanna RM Armstrong Schellenberg	Tanzania	-6.167	35.7497	39.7497	the UK	51.5004	-0.1262	Switzerland	Alonso PL	Spain	4	40.4167	-3.7033			39	5		TanzaniaSpain	5	2
56	173	Joanna RM Armstrong Schellenberg	Tanzania	-6.167	35.7497	39.7497	the UK	51.5004	-0.1262	Switzerland	Bryce J	Switzerland	4	46.948	7.4481			39	1		TanzaniaSwitzerland	7	2
56	174	Joanna RM Armstrong Schellenberg	Tanzania	-6.167	35.7497	39.7497	the UK	51.5004	-0.1262	Switzerland	de Francisco A	Gambia	3	13.45	-16.5667			39	1		TanzaniaGambia	5	2
56	175	Joanna RM Armstrong Schellenberg	Tanzania	-6.167	35.7497	39.7497	the UK	51.5004	-0.1262	Switzerland	Drakeley C	Tanzania	2	-6.167	35.7497	the UK		39	1		TanzaniaTanzania	13	3
56	176	Joanna RM Armstrong Schellenberg	Tanzania	-6.167	35.7497	39.7497	the UK	51.5004	-0.1262	Switzerland	Drakeley CJ	Tanzania	2	-6.167	35.7497	Netherlands		39	1		TanzaniaTanzania	13	3
56	177	Joanna RM Armstrong Schellenberg	Tanzania	-6.167	35.7497	39.7497	the UK	51.5004	-0.1262	Switzerland	Galindo CM	Tanzania	2	-6.167	35.7497	Spain		39	1		TanzaniaTanzania	13	3
56	178	Joanna RM Armstrong Schellenberg	Tanzania	-6.167	35.7497	39.7497	the UK	51.5004	-0.1262	Switzerland	Gouws E	Switzerland	4	46.948	7.4481			39	1		TanzaniaSwitzerland	7	2
56	179	Joanna RM Armstrong Schellenberg	Tanzania	-6.167	35.7497	39.7497	the UK	51.5004	-0.1262	Switzerland	Greenwood BM	Gambia	3	13.45	-16.5667			39	1		TanzaniaGambia	5	2
56	180	Joanna RM Armstrong Schellenberg	Tanzania	-6.167	35.7497	39.7497	the UK	51.5004	-0.1262	Switzerland	Gross K	Switzerland	4	46.948	7.4481			39	1		TanzaniaSwitzerland	7	2
56	181	Joanna RM Armstrong Schellenberg	Tanzania	-6.167	35.7497	39.7497	the UK	51.5004	-0.1262	Switzerland	Hanson K	the UK	4	51.5004	-0.1262			39	1		Tanzaniathe UK	12	3
56	182	Joanna RM Armstrong Schellenberg	Tanzania	-6.167	35.7497	39.7497	the UK	51.5004	-0.1262	Switzerland	Korenromp EL	Switzerland	4	46.948	7.4481			39	1		TanzaniaSwitzerland	7	2
56	183	Joanna RM Armstrong Schellenberg	Tanzania	-6.167	35.7497	39.7497	the UK	51.5004	-0.1262	Switzerland	Lengeler C	Switzerland	4	46.948	7.4481			39	2		TanzaniaSwitzerland	7	2
56	184	Joanna RM Armstrong Schellenberg	Tanzania	-6.167	35.7497	39.7497	the UK	51.5004	-0.1262	Switzerland	Lindsay SW	Gambia	3	13.45	-16.5667			39	3		TanzaniaGambia	5	2
56	185	Joanna RM Armstrong Schellenberg	Tanzania	-6.167	35.7497	39.7497	the UK	51.5004	-0.1262	Switzerland	Maokola W	Tanzania	2	-6.167	35.7497			39	1		TanzaniaTanzania	13	3
56	186	Joanna RM Armstrong Schellenberg	Tanzania	-6.167	35.7497	39.7497	the UK	51.5004	-0.1262	Switzerland	Marchant T	the UK	4	51.5004	-0.1262			39	4		Tanzaniathe UK	12	3
56	187	Joanna RM Armstrong Schellenberg	Tanzania	-6.167	35.7497	39.7497	the UK	51.5004	-0.1262	Switzerland	Miller JE	the UK	4	51.5004	-0.1262			39	1		Tanzaniathe UK	12	3
56	188	Joanna RM Armstrong Schellenberg	Tanzania	-6.167	35.7497	39.7497	the UK	51.5004	-0.1262	Switzerland	Mrisho M	Tanzania	2	-6.167	35.7497			39	1		TanzaniaTanzania	13	3
56	189	Joanna RM Armstrong Schellenberg	Tanzania	-6.167	35.7497	39.7497	the UK	51.5004	-0.1262	Switzerland	Nathan R	Tanzania	2	-6.167	35.7497			39	1		TanzaniaTanzania	13	3
56	190	Joanna RM Armstrong Schellenberg	Tanzania	-6.167	35.7497	39.7497	the UK	51.5004	-0.1262	Switzerland	Penfold S	the UK	4	51.5004	-0.1262			39	1		Tanzaniathe UK	12	3
56	191	Joanna RM Armstrong Schellenberg	Tanzania	-6.167	35.7497	39.7497	the UK	51.5004	-0.1262	Switzerland	Picard J	the UK	4	51.5004	-0.1262			39	1		Tanzaniathe UK	12	3
56	192	Joanna RM Armstrong Schellenberg	Tanzania	-6.167	35.7497	39.7497	the UK	51.5004	-0.1262	Switzerland	Quigley MA	the UK	4	51.5004	-0.1262			39	1		Tanzaniathe UK	12	3
56	193	Joanna RM Armstrong Schellenberg	Tanzania	-6.167	35.7497	39.7497	the UK	51.5004	-0.1262	Switzerland	Shirima K	Tanzania	2	-6.167	35.7497			39	1		TanzaniaTanzania	13	3
56	194	Joanna RM Armstrong Schellenberg	Tanzania	-6.167	35.7497	39.7497	the UK	51.5004	-0.1262	Switzerland	Victora CG	Brazil	4	-15.7833	-47.9167			39	1		TanzaniaBrazil	1	1
56	195	Joanna RM Armstrong Schellenberg	Tanzania	-6.167	35.7497	39.7497	the UK	51.5004	-0.1262	Switzerland	Willey BA	the UK	4	51.5004	-0.1262			39	1		Tanzaniathe UK	12	3
84	196	Evelyn K. Ansah	Ghana	5.5401	-0.2074	3.7926	the UK	51.5004	-0.1262		Agyepong IA	Ghana	2	5.5401	-0.2074			15	2		GhanaGhana	20	3
84	197	Evelyn K. Ansah	Ghana	5.5401	-0.2074	3.7926	the UK	51.5004	-0.1262		Chandler CI	the Uk	4	51.5004	-0.1262			15	1		Ghanathe Uk	8	2
84	198	Evelyn K. Ansah	Ghana	5.5401	-0.2074	3.7926	the UK	51.5004	-0.1262		Reynolds J	the UK	4	51.5004	-0.1262			15	2		Ghanathe UK	8	2
84	199	Evelyn K. Ansah	Ghana	5.5401	-0.2074	3.7926	the UK	51.5004	-0.1262		Kayode GA	Netherlands	4	52.3738	4.891			15	3		GhanaNetherlands	3	1
84	200	Evelyn K. Ansah	Ghana	5.5401	-0.2074	3.7926	the UK	51.5004	-0.1262		Powell-Jackson T	The UK	4	51.5004	-0.1262			15	1		GhanaThe UK	8	2
84	201	Evelyn K. Ansah	Ghana	5.5401	-0.2074	3.7926	the UK	51.5004	-0.1262		Epokor M	The UK	4	51.5004	-0.1262			15	1		GhanaThe UK	8	2
84	202	Evelyn K. Ansah	Ghana	5.5401	-0.2074	3.7926	the UK	51.5004	-0.1262		Narh-Bana S	Ghana	2	5.5401	-0.2074			15	2		GhanaGhana	20	3
84	203	Evelyn K. Ansah	Ghana	5.5401	-0.2074	3.7926	the UK	51.5004	-0.1262		Whitty CJ	The UK	4	51.5004	-0.1262			15	2		GhanaThe UK	8	2
84	204	Evelyn K. Ansah	Ghana	5.5401	-0.2074	3.7926	the UK	51.5004	-0.1262		Malenga G	Malawi	3	-13.9899	33.7703			15	1		GhanaMalawi	1	1
87	205	Everisto Opondo	Kenya	-1.2762	36.7965	40.7965	0				Khan MR	Kenya	2	-1.2762	36.7965			2	1		KenyaKenya	39	4
87	206	Everisto Opondo	Kenya	-1.2762	36.7965	40.7965	0				Wanzala P	Kenya	2	-1.2762	36.7965			2	1		KenyaKenya	39	4
88	207	PM Nthumba	Kenya	-1.2762	36.7965	40.7965	0				Axt J	USA	4	38.8921	-77.0241			19	1		KenyaUSA	9	2
88	208	PM Nthumba	Kenya	-1.2762	36.7965	40.7965	0				Barasa J	Kenya	2	-1.2762	36.7965			19	2		KenyaKenya	39	4
88	209	PM Nthumba	Kenya	-1.2762	36.7965	40.7965	0				Carter L.	Kenya	2	-1.2762	36.7965			19	1		KenyaKenya	39	4
88	210	PM Nthumba	Kenya	-1.2762	36.7965	40.7965	0				Cavadas PC	Kenya	2	-1.2762	36.7965			19	5		KenyaKenya	39	4
88	211	PM Nthumba	Kenya	-1.2762	36.7965	40.7965	0				Dale EL	USA	4	38.8921	-77.0241			19	1		KenyaUSA	9	2
88	212	PM Nthumba	Kenya	-1.2762	36.7965	40.7965	0				George S	USA	4	38.8921	-77.0241			19	1		KenyaUSA	9	2
88	213	PM Nthumba	Kenya	-1.2762	36.7965	40.7965	0				Juma PI.	Kenya	2	-1.2762	36.7965			19	1		KenyaKenya	39	4
88	214	PM Nthumba	Kenya	-1.2762	36.7965	40.7965	0				Landin L	Spain	4	40.4167	-3.7033			19	3		KenyaSpain	3	1
88	215	PM Nthumba	Kenya	-1.2762	36.7965	40.7965	0				Ngure P	Kenya	2	-1.2762	36.7965			19	1		KenyaKenya	39	4
88	216	PM Nthumba	Kenya	-1.2762	36.7965	40.7965	0				Stepita-Poenaru E	Kenya	2	-1.2762	36.7965			19	1		KenyaKenya	39	4
88	217	PM Nthumba	Kenya	-1.2762	36.7965	40.7965	0				Widmer AF	Switzerland	4	46.948	7.4481			19	1		KenyaSwitzerland	1	1
88	218	PM Nthumba	Kenya	-1.2762	36.7965	40.7965	0				Wood JH	USA	4	38.8921	-77.0241			19	1		KenyaUSA	9	2
91	219	Dejan Zurovac	Kenya	-1.2762	36.7965	40.7965	0				Abdelgader TM	Kenya	2	-1.2762	36.7965			32	1		KenyaKenya	39	4
91	220	Dejan Zurovac	Kenya	-1.2762	36.7965	40.7965	0				Amin AA	Kenya	2	-1.2762	36.7965			32	1		KenyaKenya	39	4
91	221	Dejan Zurovac	Kenya	-1.2762	36.7965	40.7965	0				Gething PW	the UK	4	51.5004	-0.1262			32	1		Kenyathe UK	1	1
91	222	Dejan Zurovac	Kenya	-1.2762	36.7965	40.7965	0				Githinji S	Kenya	2	-1.2762	36.7965			32	3		KenyaKenya	39	4
91	223	Dejan Zurovac	Kenya	-1.2762	36.7965	40.7965	0				Hamer DH	USA	4	38.8921	-77.0241			32	1		KenyaUSA	9	2
91	224	Dejan Zurovac	Kenya	-1.2762	36.7965	40.7965	0				Irimu GW	Kenya	2	-1.2762	36.7965			32	3		KenyaKenya	39	4
91	225	Dejan Zurovac	Kenya	-1.2762	36.7965	40.7965	0				Jones CO	Kenya	2	-1.2762	36.7965			32	1		KenyaKenya	39	4
91	226	Dejan Zurovac	Kenya	-1.2762	36.7965	40.7965	0				Juma E	Kenya	2	-1.2762	36.7965			32	1		KenyaKenya	39	4
91	227	Dejan Zurovac	Kenya	-1.2762	36.7965	40.7965	0				Kangwana BB	Kenya	2	-1.2762	36.7965			32	1		KenyaKenya	39	4
91	228	Dejan Zurovac	Kenya	-1.2762	36.7965	40.7965	0				Larson BA	USA	4	38.8921	-77.0241			32	3		KenyaUSA	9	2
91	229	Dejan Zurovac	Kenya	-1.2762	36.7965	40.7965	0				Lawford H	France	4	48.8567	2.351			32	1		KenyaFrance	1	1
91	230	Dejan Zurovac	Kenya	-1.2762	36.7965	40.7965	0				Mudhune SA	Kenya	2	-1.2762	36.7965			32	1		KenyaKenya	39	4
91	231	Dejan Zurovac	Kenya	-1.2762	36.7965	40.7965	0				Nankabirwa J	Uganda	3	0.3133	32.5714			32	1		KenyaUganda	2	1
91	232	Dejan Zurovac	Kenya	-1.2762	36.7965	40.7965	0				Ndhlovu M	Zambia	3	15.4145	28.2809			32	2		KenyaZambia	2	1
91	233	Dejan Zurovac	Kenya	-1.2762	36.7965	40.7965	0				Noor AM	Kenya	2	-1.2762	36.7965			32	1		KenyaKenya	39	4
91	234	Dejan Zurovac	Kenya	-1.2762	36.7965	40.7965	0				Nyandigisi A	Kenya	2	-1.2762	36.7965			32	1		KenyaKenya	39	4
91	235	Dejan Zurovac	Kenya	-1.2762	36.7965	40.7965	0				Otieno G	Kenya	2	-1.2762	36.7965			32	2		KenyaKenya	39	4
91	236	Dejan Zurovac	Kenya	-1.2762	36.7965	40.7965	0				Skarbinski J	USA	4	38.8921	-77.0241			32	1		KenyaUSA	9	2
91	237	Dejan Zurovac	Kenya	-1.2762	36.7965	40.7965	0				Sudoi RK	Kenya	2	-1.2762	36.7965			32	2		KenyaKenya	39	4
91	238	Dejan Zurovac	Kenya	-1.2762	36.7965	40.7965	0				Talisuna AO	Kenya	2	-1.2762	36.7965	the UK		32	1		KenyaKenya	39	4
91	239	Dejan Zurovac	Kenya	-1.2762	36.7965	40.7965	0				Tibenderana JK	Uganda	3	0.3133	32.5714	the UK		32	1		KenyaUganda	2	1
91	240	Dejan Zurovac	Kenya	-1.2762	36.7965	40.7965	0				Wasunna B	Kenya	2	-1.2762	36.7965			32	2		KenyaKenya	39	4
92	241	Angela Oloo Akumu	Kenya	-1.2762	36.7965	40.7965	0				English M	Kenya	2	-1.2762	36.7965			2	1		KenyaKenya	39	4
92	242	Angela Oloo Akumu	Kenya	-1.2762	36.7965	40.7965	0				Philip Ayieko	Kenya	2	-1.2762	36.7965			2	1		KenyaKenya	39	4
95	243	Lucy W Kivuti-Bitok	Kenya	-1.2762	36.7965	40.7965	0				Kipturgo MK	Kenya	2	-1.2762	36.7965			3	1		KenyaKenya	39	4
95	244	Lucy W Kivuti-Bitok	Kenya	-1.2762	36.7965	40.7965	0				McDonnell G	Kenya	2	-1.2762	36.7965			3	1		KenyaKenya	39	4
95	245	Lucy W Kivuti-Bitok	Kenya	-1.2762	36.7965	40.7965	0				Pokhariyal GP	Kenya	2	-1.2762	36.7965			3	1		KenyaKenya	39	4
96	246	Obinna Ikechukwu Ekwunife	Nigeria	9.058	7.4891	11.4891	0				Okoye MO	Nigeria	2	9.058	7.4891			14	1		NigeriaNigeria	172	6
96	247	Obinna Ikechukwu Ekwunife	Nigeria	9.058	7.4891	11.4891	0				Okafor CE	Nigeria	2	9.058	7.4891			14	1		NigeriaNigeria	172	6
96	248	Obinna Ikechukwu Ekwunife	Nigeria	9.058	7.4891	11.4891	0				Oreh C	Nigeria	2	9.058	7.4891			14	1		NigeriaNigeria	172	6
96	249	Obinna Ikechukwu Ekwunife	Nigeria	9.058	7.4891	11.4891	0				Ubaka CM	Nigeria	2	9.058	7.4891			14	1		NigeriaNigeria	172	6
96	250	Obinna Ikechukwu Ekwunife	Nigeria	9.058	7.4891	11.4891	0				Aguwa CN	Nigeria	2	9.058	7.4891			14	3		NigeriaNigeria	172	6
96	251	Obinna Ikechukwu Ekwunife	Nigeria	9.058	7.4891	11.4891	0				Ukwe CV	Nigeria	2	9.058	7.4891			14	2		NigeriaNigeria	172	6
96	252	Obinna Ikechukwu Ekwunife	Nigeria	9.058	7.4891	11.4891	0				Ezenduka CC	Nigeria	2	9.058	7.4891			14	1		NigeriaNigeria	172	6
96	253	Obinna Ikechukwu Ekwunife	Nigeria	9.058	7.4891	11.4891	0				Njilele AC	Nigeria	2	9.058	7.4891			14	1		NigeriaNigeria	172	6
96	254	Obinna Ikechukwu Ekwunife	Nigeria	9.058	7.4891	11.4891	0				Igboeli NU	Nigeria	2	9.058	7.4891			14	1		NigeriaNigeria	172	6
96	255	Obinna Ikechukwu Ekwunife	Nigeria	9.058	7.4891	11.4891	0				Udeogaranya PO	Nigeria	2	9.058	7.4891			14	1		NigeriaNigeria	172	6
96	256	Obinna Ikechukwu Ekwunife	Nigeria	9.058	7.4891	11.4891	0				Okonta JM	Nigeria	2	9.058	7.4891			14	1		NigeriaNigeria	172	6
100	257	Charles Ezenduka	Nigeria	9.058	7.4891	11.4891	0				Ichoku H	Nigeria	2	9.058	7.4891			5	1		NigeriaNigeria	172	6
100	258	Charles Ezenduka	Nigeria	9.058	7.4891	11.4891	0				Ogbonna BO	Nigeria	2	9.058	7.4891			5	1		NigeriaNigeria	172	6
100	259	Charles Ezenduka	Nigeria	9.058	7.4891	11.4891	0				Okafor CE	Nigeria	2	9.058	7.4891			5	1		NigeriaNigeria	172	6
100	260	Charles Ezenduka	Nigeria	9.058	7.4891	11.4891	0				Okonta MJ	Nigeria	2	9.058	7.4891			5	1		NigeriaNigeria	172	6
100	261	Charles Ezenduka	Nigeria	9.058	7.4891	11.4891	0				Post E	Netherlands	4	52.3738	4.891			5	1		NigeriaNetherlands	1	1
101	262	Ismail Ayinla Suleiman	Nigeria	9.058	7.4891	11.4891	0				Amogu EO	Nigeria	2	9.058	7.4891			2	1		NigeriaNigeria	172	6
101	263	Ismail Ayinla Suleiman	Nigeria	9.058	7.4891	11.4891	0				Bamiro BS	Nigeria	2	9.058	7.4891			2	1		NigeriaNigeria	172	6
102	264	Rosemary Ogu	Nigeria	9.058	7.4891	11.4891	0				Enyindah C	Nigeria	2	9.058	7.4891			8	1		NigeriaNigeria	172	6
102	265	Rosemary Ogu	Nigeria	9.058	7.4891	11.4891	0				Jamabo RS	Nigeria	2	9.058	7.4891			8	1		NigeriaNigeria	172	6
102	266	Rosemary Ogu	Nigeria	9.058	7.4891	11.4891	0				Okonofua F.	Nigeria	2	9.058	7.4891			8	5		NigeriaNigeria	172	6
102	267	Rosemary Ogu	Nigeria	9.058	7.4891	11.4891	0				Oseji M	Nigeria	2	9.058	7.4891			8	1		NigeriaNigeria	172	6
103	268	Benjamin Uzochukwu	Nigeria	9.058	7.4891	11.4891	0				Akpala CO	Nigeria	2	9.058	7.4891			66	1		NigeriaNigeria	172	6
103	269	Benjamin Uzochukwu	Nigeria	9.058	7.4891	11.4891	0				Chiegboka LO	Nigeria	2	9.058	7.4891			66	1		NigeriaNigeria	172	6
103	270	Benjamin Uzochukwu	Nigeria	9.058	7.4891	11.4891	0				Dike N	Nigeria	2	9.058	7.4891			66	1		NigeriaNigeria	172	6
103	271	Benjamin Uzochukwu	Nigeria	9.058	7.4891	11.4891	0				Ezeoke OP	Nigeria	2	9.058	7.4891			66	2		NigeriaNigeria	172	6
103	272	Benjamin Uzochukwu	Nigeria	9.058	7.4891	11.4891	0				Lê G	the UK	4	51.5004	-0.1262			66	1		Nigeriathe UK	28	4
103	273	Benjamin Uzochukwu	Nigeria	9.058	7.4891	11.4891	0				Mangham LJ	the UK	4	51.5004	-0.1262			66	1		Nigeriathe UK	28	4
103	274	Benjamin Uzochukwu	Nigeria	9.058	7.4891	11.4891	0				Mbachu CO	Nigeria	2	9.058	7.4891			66	2		NigeriaNigeria	172	6
103	275	Benjamin Uzochukwu	Nigeria	9.058	7.4891	11.4891	0				Mirzoev T	the UK	4	51.5004	-0.1262			66	1		Nigeriathe UK	28	4
103	276	Benjamin Uzochukwu	Nigeria	9.058	7.4891	11.4891	0				Obikeze EN	Nigeria	2	9.058	7.4891			66	1		NigeriaNigeria	172	6
103	277	Benjamin Uzochukwu	Nigeria	9.058	7.4891	11.4891	0				Okeke TA	Nigeria	2	9.058	7.4891			66	2		NigeriaNigeria	172	6
103	278	Benjamin Uzochukwu	Nigeria	9.058	7.4891	11.4891	0				Onoka CA	Nigeria	2	9.058	7.4891			66	3		NigeriaNigeria	172	6
103	279	Benjamin Uzochukwu	Nigeria	9.058	7.4891	11.4891	0				Onwujekwe E	Nigeria	2	9.058	7.4891			66	1		NigeriaNigeria	172	6
103	280	Benjamin Uzochukwu	Nigeria	9.058	7.4891	11.4891	0				Onwujekwe EO	Nigeria	2	9.058	7.4891			66	1		NigeriaNigeria	172	6
103	281	Benjamin Uzochukwu	Nigeria	9.058	7.4891	11.4891	0				Onwujekwe O	Nigeria	2	9.058	7.4891			66	32	x	NigeriaNigeria	172	6
103	282	Benjamin Uzochukwu	Nigeria	9.058	7.4891	11.4891	0				Onwujekwe OC	Nigeria	2	9.058	7.4891			66	1	x	NigeriaNigeria	172	6
103	283	Benjamin Uzochukwu	Nigeria	9.058	7.4891	11.4891	0				Onwujekwe OE	Nigeria	2	9.058	7.4891			66	9	x	NigeriaNigeria	172	6
103	284	Benjamin Uzochukwu	Nigeria	9.058	7.4891	11.4891	0				Ughasoro MD	Nigeria	2	9.058	7.4891			66	1		NigeriaNigeria	172	6
103	285	Benjamin Uzochukwu	Nigeria	9.058	7.4891	11.4891	0				Uguru N	Nigeria	2	9.058	7.4891			66	1		NigeriaNigeria	172	6
103	286	Benjamin Uzochukwu	Nigeria	9.058	7.4891	11.4891	0				Uguru NP	Nigeria	2	9.058	7.4891			66	2		NigeriaNigeria	172	6
103	287	Benjamin Uzochukwu	Nigeria	9.058	7.4891	11.4891	0				Ugwu EO	Nigeria	2	9.058	7.4891			66	1		NigeriaNigeria	172	6
103	288	Benjamin Uzochukwu	Nigeria	9.058	7.4891	11.4891	0				Wiseman V	the UK	4	51.5004	-0.1262			66	1		Nigeriathe UK	28	4
104	289	Bolajoko O. Olusanya	Nigeria	9.058	7.4891	11.4891	the UK	51.5004	-0.1262		Afe AJ	Nigeria	2	9.058	7.4891			49	2		NigeriaNigeria	172	6
104	290	Bolajoko O. Olusanya	Nigeria	9.058	7.4891	11.4891	the UK	51.5004	-0.1262		Akinyemi OO.	Nigeria	2	9.058	7.4891			49	1		NigeriaNigeria	172	6
104	291	Bolajoko O. Olusanya	Nigeria	9.058	7.4891	11.4891	the UK	51.5004	-0.1262		Bamigboye BA	Nigeria	2	9.058	7.4891			49	3		NigeriaNigeria	172	6
104	292	Bolajoko O. Olusanya	Nigeria	9.058	7.4891	11.4891	the UK	51.5004	-0.1262		Bhutani VK	USA	4	38.8921	-77.0241			49	1		NigeriaUSA	16	3
104	293	Bolajoko O. Olusanya	Nigeria	9.058	7.4891	11.4891	the UK	51.5004	-0.1262		Cline BK	USA	4	38.8921	-77.0241			49	1		NigeriaUSA	16	3
104	294	Bolajoko O. Olusanya	Nigeria	9.058	7.4891	11.4891	the UK	51.5004	-0.1262		Ebuehi OM.	Nigeria	2	9.058	7.4891			49	1		NigeriaNigeria	172	6
104	295	Bolajoko O. Olusanya	Nigeria	9.058	7.4891	11.4891	the UK	51.5004	-0.1262		Eletu OB	Nigeria	2	9.058	7.4891			49	1		NigeriaNigeria	172	6
104	296	Bolajoko O. Olusanya	Nigeria	9.058	7.4891	11.4891	the UK	51.5004	-0.1262		Emokpae AA	Nigeria	2	9.058	7.4891			49	1		NigeriaNigeria	172	6
104	297	Bolajoko O. Olusanya	Nigeria	9.058	7.4891	11.4891	the UK	51.5004	-0.1262		Ezeaka CV	Nigeria	2	9.058	7.4891			49	2		NigeriaNigeria	172	6
104	298	Bolajoko O. Olusanya	Nigeria	9.058	7.4891	11.4891	the UK	51.5004	-0.1262		Imam ZO	Nigeria	2	9.058	7.4891			49	1		NigeriaNigeria	172	6
104	299	Bolajoko O. Olusanya	Nigeria	9.058	7.4891	11.4891	the UK	51.5004	-0.1262		Inem VA	Nigeria	2	9.058	7.4891			49	1		NigeriaNigeria	172	6
104	300	Bolajoko O. Olusanya	Nigeria	9.058	7.4891	11.4891	the UK	51.5004	-0.1262		Kassebaum NJ	USA	4	38.8921	-77.0241			49	1		NigeriaUSA	16	3
104	301	Bolajoko O. Olusanya	Nigeria	9.058	7.4891	11.4891	the UK	51.5004	-0.1262		Luxon LM	the UK	4	51.5004	-0.1262			49	1		Nigeriathe UK	28	4
104	302	Bolajoko O. Olusanya	Nigeria	9.058	7.4891	11.4891	the UK	51.5004	-0.1262		Murray CJ	USA	4	38.8921	-77.0241			49	1		NigeriaUSA	16	3
104	303	Bolajoko O. Olusanya	Nigeria	9.058	7.4891	11.4891	the UK	51.5004	-0.1262		Neumann KJ	Germany	4	52.5235	13.4115			49	1		NigeriaGermany	1	1
104	304	Bolajoko O. Olusanya	Nigeria	9.058	7.4891	11.4891	the UK	51.5004	-0.1262		Newton VE.	the UK	4	51.5004	-0.1262			49	1		Nigeriathe UK	28	4
104	305	Bolajoko O. Olusanya	Nigeria	9.058	7.4891	11.4891	the UK	51.5004	-0.1262		Ofovwe GE.	Benin	3	6.48333	2.61667			49	1		NigeriaBenin	1	1
104	306	Bolajoko O. Olusanya	Nigeria	9.058	7.4891	11.4891	the UK	51.5004	-0.1262		Ogunlesi TA	Nigeria	2	9.058	7.4891			49	1		NigeriaNigeria	172	6
104	307	Bolajoko O. Olusanya	Nigeria	9.058	7.4891	11.4891	the UK	51.5004	-0.1262		Okolo AA.	Nigeria	2	9.058	7.4891			49	3		NigeriaNigeria	172	6
104	308	Bolajoko O. Olusanya	Nigeria	9.058	7.4891	11.4891	the UK	51.5004	-0.1262		Renner JK.	Nigeria	2	9.058	7.4891			49	3		NigeriaNigeria	172	6
104	309	Bolajoko O. Olusanya	Nigeria	9.058	7.4891	11.4891	the UK	51.5004	-0.1262		Roberts AA.	Nigeria	2	9.058	7.4891			49	2		NigeriaNigeria	172	6
104	310	Bolajoko O. Olusanya	Nigeria	9.058	7.4891	11.4891	the UK	51.5004	-0.1262		Ruben RJ	USA	4	38.8921	-77.0241			49	1		NigeriaUSA	16	3
104	311	Bolajoko O. Olusanya	Nigeria	9.058	7.4891	11.4891	the UK	51.5004	-0.1262		Slusher TM.	USA	4	38.8921	-77.0241			49	4		NigeriaUSA	16	3
104	312	Bolajoko O. Olusanya	Nigeria	9.058	7.4891	11.4891	the UK	51.5004	-0.1262		Solanke OA.	Nigeria	2	9.058	7.4891			49	7		NigeriaNigeria	172	6
104	313	Bolajoko O. Olusanya	Nigeria	9.058	7.4891	11.4891	the UK	51.5004	-0.1262		Somefun AO.	Nigeria	2	9.058	7.4891			49	2		NigeriaNigeria	172	6
104	314	Bolajoko O. Olusanya	Nigeria	9.058	7.4891	11.4891	the UK	51.5004	-0.1262		Swanepoel de W	South Africa	3	-25.7463	28.1876			49	3		NigeriaSouth Africa	4	1
104	315	Bolajoko O. Olusanya	Nigeria	9.058	7.4891	11.4891	the UK	51.5004	-0.1262		Vreman HJ	USA	4	38.8921	-77.0241			49	1		NigeriaUSA	16	3
104	316	Bolajoko O. Olusanya	Nigeria	9.058	7.4891	11.4891	the UK	51.5004	-0.1262		Wirz SL	the UK	4	51.5004	-0.1262			49	1		Nigeriathe UK	28	4
105	317	Asfaw Demissie Bikilla	Ethiopia	9.0084	38.7575	42.7575	Norway	59.9138	10.7387		Jerene D	Norway	4	59.9138	10.7387			2	2		EthiopiaNorway	2	1
107	318	Yibeltal A Kifle	Ethiopia	9.0084	38.7575	42.7575	0				Nigatu TH.	Ethiopia	2	9.0084	38.7575			1	1		EthiopiaEthiopia	4	1
109	319	Hailemariam Lemma	Ethiopia	9.0084	38.7575	42.7575	0				Belayneh M	Ethiopia	2	9.0084	38.7575			7	1		EthiopiaEthiopia	4	1
109	320	Hailemariam Lemma	Ethiopia	9.0084	38.7575	42.7575	0				Byass P	Sweden	4	59.3328	18.0645			7	1		EthiopiaSweden	5	2
109	321	Hailemariam Lemma	Ethiopia	9.0084	38.7575	42.7575	0				Löfgren C	Sweden	4	59.3328	18.0645			7	1		EthiopiaSweden	5	2
109	322	Hailemariam Lemma	Ethiopia	9.0084	38.7575	42.7575	0				Paulander J	Sweden	4	59.3328	18.0645			7	1		EthiopiaSweden	5	2
109	323	Hailemariam Lemma	Ethiopia	9.0084	38.7575	42.7575	0				San Sebastian M	Sweden	4	59.3328	18.0645			7	2		EthiopiaSweden	5	2
109	324	Hailemariam Lemma	Ethiopia	9.0084	38.7575	42.7575	0				Tsegay Y	Ethiopia	2	9.0084	38.7575			7	1		EthiopiaEthiopia	4	1
110	325	Asayehegn Tekeste	Ethiopia	9.0084	38.7575	42.7575	0				Wondafrash M	Ethiopia	2	9.0084	38.7575			1	1		EthiopiaEthiopia	4	1
116	326	Nazarius M Tumwesigye	Uganda	0.3133	32.5714	36.5714	0				Albert LM	USA	4	38.8921	-77.0241			36	1		UgandaUSA	11	3
116	327	Nazarius M Tumwesigye	Uganda	0.3133	32.5714	36.5714	0				Atuyambe L	Uganda	2	0.3133	32.5714			36	3		UgandaUganda	57	5
116	328	Nazarius M Tumwesigye	Uganda	0.3133	32.5714	36.5714	0				Byamugisha JK	Uganda	2	0.3133	32.5714			36	1		UgandaUganda	57	5
116	329	Nazarius M Tumwesigye	Uganda	0.3133	32.5714	36.5714	0				Ediau M	Uganda	2	0.3133	32.5714			36	2		UgandaUganda	57	5
116	330	Nazarius M Tumwesigye	Uganda	0.3133	32.5714	36.5714	0				Kibira SP	Uganda	2	0.3133	32.5714			36	1		UgandaUganda	57	5
116	331	Nazarius M Tumwesigye	Uganda	0.3133	32.5714	36.5714	0				Kiondo P	Uganda	2	0.3133	32.5714			36	4		UgandaUganda	57	5
116	332	Nazarius M Tumwesigye	Uganda	0.3133	32.5714	36.5714	0				Lubega M	Uganda	2	0.3133	32.5714			36	1		UgandaUganda	57	5
116	333	Nazarius M Tumwesigye	Uganda	0.3133	32.5714	36.5714	0				Muhamadi L	Uganda	2	0.3133	32.5714			36	2		UgandaUganda	57	5
116	334	Nazarius M Tumwesigye	Uganda	0.3133	32.5714	36.5714	0				Nalwadda G	Uganda	2	0.3133	32.5714			36	2		UgandaUganda	57	5
116	335	Nazarius M Tumwesigye	Uganda	0.3133	32.5714	36.5714	0				Room R	Australia	4	-35.282	149.129			36	1		UgandaAustralia	3	1
116	336	Nazarius M Tumwesigye	Uganda	0.3133	32.5714	36.5714	0				Tweheyo R	Uganda	2	0.3133	32.5714			36	1		UgandaUganda	57	5
116	337	Nazarius M Tumwesigye	Uganda	0.3133	32.5714	36.5714	0				Wabwire-Mangen F	Uganda	2	0.3133	32.5714			36	1		UgandaUganda	57	5
116	338	Nazarius M Tumwesigye	Uganda	0.3133	32.5714	36.5714	0				Wanyenze RK	Uganda	2	0.3133	32.5714			36	4		UgandaUganda	57	5
116	339	Nazarius M Tumwesigye	Uganda	0.3133	32.5714	36.5714	0				Jacinto A	Uganda	2	0.3133	32.5714			36	1		UgandaUganda	57	5
116	340	Nazarius M Tumwesigye	Uganda	0.3133	32.5714	36.5714	0				Barageine JK	Uganda	2	0.3133	32.5714	Sweden		36	1		UgandaUganda	57	5
116	341	Nazarius M Tumwesigye	Uganda	0.3133	32.5714	36.5714	0				Gilmore B	Ireland	4	53.3441	-6.2675			36	1		UgandaIreland	1	1
116	342	Nazarius M Tumwesigye	Uganda	0.3133	32.5714	36.5714	0				Ingham R	the UK	4	51.5004	-0.1262			36	1		Ugandathe UK	9	2
116	343	Nazarius M Tumwesigye	Uganda	0.3133	32.5714	36.5714	0				Kyomuhendo GB	Uganda	2	0.3133	32.5714			36	1		UgandaUganda	57	5
116	344	Nazarius M Tumwesigye	Uganda	0.3133	32.5714	36.5714	0				Ogwang S	Uganda	2	0.3133	32.5714			36	1		UgandaUganda	57	5
116	345	Nazarius M Tumwesigye	Uganda	0.3133	32.5714	36.5714	0				Hull T	Australia	4	-35.282	149.129			36	1		UgandaAustralia	3	1
116	346	Nazarius M Tumwesigye	Uganda	0.3133	32.5714	36.5714	0				Drabble LA	USA	4	38.8921	-77.0241			36	1		UgandaUSA	11	3
116	347	Nazarius M Tumwesigye	Uganda	0.3133	32.5714	36.5714	0				Nabbuye-Sekandi J	Uganda	2	0.3133	32.5714			36	1		UgandaUganda	57	5
116	348	Nazarius M Tumwesigye	Uganda	0.3133	32.5714	36.5714	0				Kasirye R	Uganda	2	0.3133	32.5714			36	1		UgandaUganda	57	5
116	349	Nazarius M Tumwesigye	Uganda	0.3133	32.5714	36.5714	0				Matovu A	Uganda	2	0.3133	32.5714			36	1		UgandaUganda	57	5
116	350	Nazarius M Tumwesigye	Uganda	0.3133	32.5714	36.5714	0				Ijsselmuiden CB	Switzerland	4	46.948	7.4481			36	1		UgandaSwitzerland	1	1
117	351	Kevin Duffy	Uganda	0.3133	32.5714	36.5714	0				Galukande M	Uganda	2	0.3133	32.5714			11	4		UgandaUganda	57	5
117	352	Kevin Duffy	Uganda	0.3133	32.5714	36.5714	0				Howell K	USA	4	38.8921	-77.0241			11	1		UgandaUSA	11	3
117	353	Kevin Duffy	Uganda	0.3133	32.5714	36.5714	0				Nassr Nassr	Germany	4	52.5235	13.4115			11	1		UgandaGermany	1	1
117	354	Kevin Duffy	Uganda	0.3133	32.5714	36.5714	0				Pappalardi M	USA	4	38.8921	-77.0241			11	1		UgandaUSA	11	3
117	355	Kevin Duffy	Uganda	0.3133	32.5714	36.5714	0				Rahmouni HW	USA	4	38.8921	-77.0241			11	1		UgandaUSA	11	3
117	356	Kevin Duffy	Uganda	0.3133	32.5714	36.5714	0				Spierer DK	USA	4	38.8921	-77.0241			11	2		UgandaUSA	11	3
117	357	Kevin Duffy	Uganda	0.3133	32.5714	36.5714	0				Tendulkar SA	the UK	4	51.5004	-0.1262			11	1		Ugandathe UK	9	2
119	358	Jan H Kolaczinski	Uganda	0.3133	32.5714	36.5714	the UK	51.5004	-0.1262		Ashton RA	Uganda	2	0.3133	32.5714			26	4		UgandaUganda	57	5
119	359	Jan H Kolaczinski	Uganda	0.3133	32.5714	36.5714	the UK	51.5004	-0.1262		Brooker S	Kenya	3	-1.2762	36.7965			26	2		UgandaKenya	2	1
119	360	Jan H Kolaczinski	Uganda	0.3133	32.5714	36.5714	the UK	51.5004	-0.1262		Clements AC	Australia	4	-35.282	149.129			26	1		UgandaAustralia	3	1
119	361	Jan H Kolaczinski	Uganda	0.3133	32.5714	36.5714	the UK	51.5004	-0.1262		Edwards T	the UK	4	51.5004	-0.1262			26	1		Ugandathe UK	9	2
119	362	Jan H Kolaczinski	Uganda	0.3133	32.5714	36.5714	the UK	51.5004	-0.1262		Finn TP	South Sudan	3	4.85	31.6167			26	1		UgandaSouth Sudan	6	2
119	363	Jan H Kolaczinski	Uganda	0.3133	32.5714	36.5714	the UK	51.5004	-0.1262		Hanson K	the UK	4	51.5004	-0.1262			26	1		Ugandathe UK	9	2
119	364	Jan H Kolaczinski	Uganda	0.3133	32.5714	36.5714	the UK	51.5004	-0.1262		Hope A	South Sudan	3	4.85	31.6167			26	1		UgandaSouth Sudan	6	2
119	365	Jan H Kolaczinski	Uganda	0.3133	32.5714	36.5714	the UK	51.5004	-0.1262		Kabatereine NB	Uganda	2	0.3133	32.5714			26	2		UgandaUganda	57	5
119	366	Jan H Kolaczinski	Uganda	0.3133	32.5714	36.5714	the UK	51.5004	-0.1262		Kolaczinski K	Uganda	2	0.3133	32.5714			26	1		UgandaUganda	57	5
119	367	Jan H Kolaczinski	Uganda	0.3133	32.5714	36.5714	the UK	51.5004	-0.1262		Mueller YK	France	4	48.8567	2.351	Switzerland	the UK	26	1		UgandaFrance	1	1
119	368	Jan H Kolaczinski	Uganda	0.3133	32.5714	36.5714	the UK	51.5004	-0.1262		Muhammad N	Pakistan	4	33.6751	73.0946			26	1		UgandaPakistan	1	1
119	369	Jan H Kolaczinski	Uganda	0.3133	32.5714	36.5714	the UK	51.5004	-0.1262		Ojok N	Uganda	2	0.3133	32.5714			26	1		UgandaUganda	57	5
119	370	Jan H Kolaczinski	Uganda	0.3133	32.5714	36.5714	the UK	51.5004	-0.1262		Reithinger R	the UK	4	51.5004	-0.1262	USA		26	3		Ugandathe UK	9	2
119	371	Jan H Kolaczinski	Uganda	0.3133	32.5714	36.5714	the UK	51.5004	-0.1262		Robinson E	South Sudan	3	4.85	31.6167			26	2		UgandaSouth Sudan	6	2
119	372	Jan H Kolaczinski	Uganda	0.3133	32.5714	36.5714	the UK	51.5004	-0.1262		Sturrock HJ	South Sudan	3	4.85	31.6167	the UK		26	2		UgandaSouth Sudan	6	2
119	373	Jan H Kolaczinski	Uganda	0.3133	32.5714	36.5714	the UK	51.5004	-0.1262		Tadesse Z	Ethiopia	3	9.0084	38.7575			26	1		UgandaEthiopia	1	1
119	374	Jan H Kolaczinski	Uganda	0.3133	32.5714	36.5714	the UK	51.5004	-0.1262		Worku DT	Uganda	2	0.3133	32.5714			26	1		UgandaUganda	57	5
121	375	Anthony K. Mbonye	Uganda	0.3133	32.5714	36.5714	0				Asiimwe JB	Uganda	2	0.3133	32.5714			30	2		UgandaUganda	57	5
121	376	Anthony K. Mbonye	Uganda	0.3133	32.5714	36.5714	0				Banura C	Uganda	2	0.3133	32.5714			30	2		UgandaUganda	57	5
121	377	Anthony K. Mbonye	Uganda	0.3133	32.5714	36.5714	0				Birungi J	Uganda	2	0.3133	32.5714			30	1		UgandaUganda	57	5
121	378	Anthony K. Mbonye	Uganda	0.3133	32.5714	36.5714	0				Burke HM	USA	4	38.8921	-77.0241			30	1		UgandaUSA	11	3
121	379	Anthony K. Mbonye	Uganda	0.3133	32.5714	36.5714	0				Bygbjerg I	Denmark	4	55.6667	12.5833			30	3		UgandaDenmark	7	2
121	380	Anthony K. Mbonye	Uganda	0.3133	32.5714	36.5714	0				Chandler CI	the UK	4	51.5004	-0.1262			30	1		Ugandathe UK	9	2
121	381	Anthony K. Mbonye	Uganda	0.3133	32.5714	36.5714	0				Colenbrander S	Uganda	2	0.3133	32.5714	South Africa	Irlanda and the UK	30	1		UgandaUganda	57	5
121	382	Anthony K. Mbonye	Uganda	0.3133	32.5714	36.5714	0				Dowell SF	USA	4	38.8921	-77.0241			30	1		UgandaUSA	11	3
121	383	Anthony K. Mbonye	Uganda	0.3133	32.5714	36.5714	0				Lal S	the UK	4	51.5004	-0.1262			30	1		Ugandathe UK	9	2
121	384	Anthony K. Mbonye	Uganda	0.3133	32.5714	36.5714	0				Magnussen P	Denmark	4	55.6667	12.5833			30	4		UgandaDenmark	7	2
121	385	Anthony K. Mbonye	Uganda	0.3133	32.5714	36.5714	0				Nalwadda Kayemba C	Uganda	2	0.3133	32.5714			30	1		UgandaUganda	57	5
121	386	Anthony K. Mbonye	Uganda	0.3133	32.5714	36.5714	0				Ndyomugyenyi R	Uganda	2	0.3133	32.5714			30	1		UgandaUganda	57	5
121	387	Anthony K. Mbonye	Uganda	0.3133	32.5714	36.5714	0				Neema S	Uganda	2	0.3133	32.5714			30	3		UgandaUganda	57	5
121	388	Anthony K. Mbonye	Uganda	0.3133	32.5714	36.5714	0				Sentongo M	Uganda	2	0.3133	32.5714			30	1		UgandaUganda	57	5
121	389	Anthony K. Mbonye	Uganda	0.3133	32.5714	36.5714	0				Stanback J	USA	4	38.8921	-77.0241			30	2		UgandaUSA	11	3
121	390	Anthony K. Mbonye	Uganda	0.3133	32.5714	36.5714	0				Taylor BJ	Canada	4	45.4235	-75.6979			30	1		UgandaCanada	2	1
121	391	Anthony K. Mbonye	Uganda	0.3133	32.5714	36.5714	0				Wamala JF	Uganda	2	0.3133	32.5714			30	2		UgandaUganda	57	5
121	392	Anthony K. Mbonye	Uganda	0.3133	32.5714	36.5714	0				Wamono F.	Uganda	2	0.3133	32.5714			30	1		UgandaUganda	57	5
121	393	Anthony K. Mbonye	Uganda	0.3133	32.5714	36.5714	0				Yanow S	Canada	4	45.4235	-75.6979			30	1		UgandaCanada	2	1
124	394	Kingsley Osei-Kwakye	Ghana	5.5401	-0.2074	3.7926	0				Agnandji ST	Gabon	3	0.383333	9.45			13	4		GhanaGabon	4	1
124	395	Kingsley Osei-Kwakye	Ghana	5.5401	-0.2074	3.7926	0				Ansong D	Ghana	2	5.5401	-0.2074			13	1		GhanaGhana	20	3
124	396	Kingsley Osei-Kwakye	Ghana	5.5401	-0.2074	3.7926	0				Asante KP	Ghana	2	5.5401	-0.2074			13	1		GhanaGhana	20	3
124	397	Kingsley Osei-Kwakye	Ghana	5.5401	-0.2074	3.7926	0				Dosoo DK	Ghana	2	5.5401	-0.2074			13	2		GhanaGhana	20	3
124	398	Kingsley Osei-Kwakye	Ghana	5.5401	-0.2074	3.7926	0				Evans JA	Ghana	2	5.5401	-0.2074			13	1		GhanaGhana	20	3
124	399	Kingsley Osei-Kwakye	Ghana	5.5401	-0.2074	3.7926	0				Goldman N	The UK	4	51.5004	-0.1262			13	1		GhanaThe UK	8	2
124	400	Kingsley Osei-Kwakye	Ghana	5.5401	-0.2074	3.7926	0				Owusu-Agyei S	Ghana	2	5.5401	-0.2074			13	1		GhanaGhana	20	3
124	401	Kingsley Osei-Kwakye	Ghana	5.5401	-0.2074	3.7926	0				Timmann C	Germany	4	52.5235	13.4115			13	2		GhanaGermany	2	1
126	402	Justice Nonvignon	Ghana	5.5401	-0.2074	3.7926	0				Abbey M	Ghana	2	5.5401	-0.2074			16	1		GhanaGhana	20	3
126	403	Justice Nonvignon	Ghana	5.5401	-0.2074	3.7926	0				Addo R	Ghana	2	5.5401	-0.2074			16	1		GhanaGhana	20	3
126	404	Justice Nonvignon	Ghana	5.5401	-0.2074	3.7926	0				Agyepong IA	Ghana	2	5.5401	-0.2074			16	1		GhanaGhana	20	3
126	405	Justice Nonvignon	Ghana	5.5401	-0.2074	3.7926	0				Aikins M	Ghana	2	5.5401	-0.2074			16	2		GhanaGhana	20	3
126	406	Justice Nonvignon	Ghana	5.5401	-0.2074	3.7926	0				Bosomprah S	Ghana	2	5.5401	-0.2074			16	1		GhanaGhana	20	3
126	407	Justice Nonvignon	Ghana	5.5401	-0.2074	3.7926	0				Chinbuah MA	Ghana	2	5.5401	-0.2074			16	3		GhanaGhana	20	3
126	408	Justice Nonvignon	Ghana	5.5401	-0.2074	3.7926	0				Eliason S	Ghana	2	5.5401	-0.2074			16	1		GhanaGhana	20	3
126	409	Justice Nonvignon	Ghana	5.5401	-0.2074	3.7926	0				Novignon J	Nigeria	4	9.058	7.4891			16	4		GhanaNigeria	4	1
126	410	Justice Nonvignon	Ghana	5.5401	-0.2074	3.7926	0				Pallas SW	USA	4	38.8921	-77.0241			16	1		GhanaUSA	1	1
126	411	Justice Nonvignon	Ghana	5.5401	-0.2074	3.7926	0				Tlotlego N	Congo	3	-4.3369	15.3271			16	1		GhanaCongo	1	1
128	412	Obinna Onwujekwe	Nigeria	9.058	7.4891	11.4891	0				Aliyu MH	USA	4	38.8921	-77.0241			81	1		NigeriaUSA	16	3
128	413	Obinna Onwujekwe	Nigeria	9.058	7.4891	11.4891	0				Chima R	Nigeria	2	9.058	7.4891			81	2		NigeriaNigeria	172	6
128	414	Obinna Onwujekwe	Nigeria	9.058	7.4891	11.4891	0				Chukwuogo O	Nigeria	2	9.058	7.4891			81	1		NigeriaNigeria	172	6
128	415	Obinna Onwujekwe	Nigeria	9.058	7.4891	11.4891	0				Dike N	USA	4	38.8921	-77.0241			81	5		NigeriaUSA	16	3
128	416	Obinna Onwujekwe	Nigeria	9.058	7.4891	11.4891	0				Enemuoh JC	Nigeria	2	9.058	7.4891			81	1		NigeriaNigeria	172	6
128	417	Obinna Onwujekwe	Nigeria	9.058	7.4891	11.4891	0				Etiaba E	Nigeria	2	9.058	7.4891			81	1		NigeriaNigeria	172	6
128	418	Obinna Onwujekwe	Nigeria	9.058	7.4891	11.4891	0				Ewelukwa O	Nigeria	2	9.058	7.4891			81	1		NigeriaNigeria	172	6
128	419	Obinna Onwujekwe	Nigeria	9.058	7.4891	11.4891	0				Ezenduka C	Nigeria	2	9.058	7.4891			81	1	x	NigeriaNigeria	172	6
128	420	Obinna Onwujekwe	Nigeria	9.058	7.4891	11.4891	0				Ezeoke OP	Nigeria	2	9.058	7.4891			81	2		NigeriaNigeria	172	6
128	421	Obinna Onwujekwe	Nigeria	9.058	7.4891	11.4891	0				Fox-Rushby J	the UK	4	51.5004	-0.1262			81	3		Nigeriathe UK	28	4
128	422	Obinna Onwujekwe	Nigeria	9.058	7.4891	11.4891	0				Hanson K	the UK	4	51.5004	-0.1262			81	10		Nigeriathe UK	28	4
128	423	Obinna Onwujekwe	Nigeria	9.058	7.4891	11.4891	0				Howe LD	the UK	4	51.5004	-0.1262			81	1		Nigeriathe UK	28	4
128	424	Obinna Onwujekwe	Nigeria	9.058	7.4891	11.4891	0				Kaur H	the UK	4	51.5004	-0.1262			81	1		Nigeriathe UK	28	4
128	425	Obinna Onwujekwe	Nigeria	9.058	7.4891	11.4891	0				Malik el-F	Sudan	3	4.8496	31.6046			81	2		NigeriaSudan	2	1
128	426	Obinna Onwujekwe	Nigeria	9.058	7.4891	11.4891	0				Mangham LJ	the UK	4	51.5004	-0.1262			81	1		Nigeriathe UK	28	4
128	427	Obinna Onwujekwe	Nigeria	9.058	7.4891	11.4891	0				Mangham-Jefferies L	the UK	4	51.5004	-0.1262			81	3		Nigeriathe UK	28	4
128	428	Obinna Onwujekwe	Nigeria	9.058	7.4891	11.4891	0				Mbachu CO	Nigeria	2	9.058	7.4891			81	2		NigeriaNigeria	172	6
128	429	Obinna Onwujekwe	Nigeria	9.058	7.4891	11.4891	0				Nwagbo D.	Nigeria	2	9.058	7.4891			81	1		NigeriaNigeria	172	6
128	430	Obinna Onwujekwe	Nigeria	9.058	7.4891	11.4891	0				Obikeze E	Nigeria	2	9.058	7.4891			81	1		NigeriaNigeria	172	6
128	431	Obinna Onwujekwe	Nigeria	9.058	7.4891	11.4891	0				Ogah OS	South Africa	3	-25.7463	28.1876			81	1		NigeriaSouth Africa	4	1
128	432	Obinna Onwujekwe	Nigeria	9.058	7.4891	11.4891	0				Ogbonna C	Nigeria	2	9.058	7.4891			81	2		NigeriaNigeria	172	6
128	433	Obinna Onwujekwe	Nigeria	9.058	7.4891	11.4891	0				Ojukwu J	Nigeria	2	9.058	7.4891			81	2		NigeriaNigeria	172	6
128	434	Obinna Onwujekwe	Nigeria	9.058	7.4891	11.4891	0				Okereke E	Nigeria	2	9.058	7.4891			81	1		NigeriaNigeria	172	6
128	435	Obinna Onwujekwe	Nigeria	9.058	7.4891	11.4891	0				Okoronkwo IL	Nigeria	2	9.058	7.4891			81	1		NigeriaNigeria	172	6
128	436	Obinna Onwujekwe	Nigeria	9.058	7.4891	11.4891	0				Onoka CA	Nigeria	2	9.058	7.4891			81	7		NigeriaNigeria	172	6
128	437	Obinna Onwujekwe	Nigeria	9.058	7.4891	11.4891	0				Ughasoro MD	Nigeria	2	9.058	7.4891			81	1		NigeriaNigeria	172	6
128	438	Obinna Onwujekwe	Nigeria	9.058	7.4891	11.4891	0				Uguru N	Nigeria	2	9.058	7.4891			81	1		NigeriaNigeria	172	6
128	439	Obinna Onwujekwe	Nigeria	9.058	7.4891	11.4891	0				Uguru NP	Nigeria	2	9.058	7.4891			81	2		NigeriaNigeria	172	6
128	440	Obinna Onwujekwe	Nigeria	9.058	7.4891	11.4891	0				Uzochukwu B	Nigeria	2	9.058	7.4891			81	11	x	NigeriaNigeria	172	6
128	441	Obinna Onwujekwe	Nigeria	9.058	7.4891	11.4891	0				Uzochukwu BS	Nigeria	2	9.058	7.4891			81	10	x	NigeriaNigeria	172	6
128	442	Obinna Onwujekwe	Nigeria	9.058	7.4891	11.4891	0				Wiseman V	the UK	4	51.5004	-0.1262			81	2		Nigeriathe UK	28	4
41 / 42	443	Sydney Rosen	South Africa	-25.7463	28.1876	32.1876	USA	38.8921	-77.0241		Beard J	USA	4	38.8921	-77.0241			57	1		South AfricaUSA	53	5
41 / 42	444	Sydney Rosen	South Africa	-25.7463	28.1876	32.1876	USA	38.8921	-77.0241		Connelly D	USA	4	38.8921	-77.0241			57	1		South AfricaUSA	53	5
41 / 42	445	Sydney Rosen	South Africa	-25.7463	28.1876	32.1876	USA	38.8921	-77.0241		Connelly P	USA	4	38.8921	-77.0241			57	2		South AfricaUSA	53	5
41 / 42	446	Sydney Rosen	South Africa	-25.7463	28.1876	32.1876	USA	38.8921	-77.0241		Evian C	South Africa	2	-25.7463	28.1876			57	1		South AfricaSouth Africa	84	6
41 / 42	447	Sydney Rosen	South Africa	-25.7463	28.1876	32.1876	USA	38.8921	-77.0241		Feeley F	USA	4	38.8921	-77.0241			57	2		South AfricaUSA	53	5
41 / 42	448	Sydney Rosen	South Africa	-25.7463	28.1876	32.1876	USA	38.8921	-77.0241		Fox MP	South Africa	2	-25.7463	28.1876	USA		57	9		South AfricaSouth Africa	84	6
41 / 42	449	Sydney Rosen	South Africa	-25.7463	28.1876	32.1876	USA	38.8921	-77.0241		Hamazakaza P	Zambia	3	15.4145	28.2809			57	1		South AfricaZambia	5	2
41 / 42	450	Sydney Rosen	South Africa	-25.7463	28.1876	32.1876	USA	38.8921	-77.0241		Harries AD	France	4	48.8567	2.351			57	1		South AfricaFrance	1	1
41 / 42	451	Sydney Rosen	South Africa	-25.7463	28.1876	32.1876	USA	38.8921	-77.0241		Iyer HS	Zambia	3	15.4145	28.2809			57	1		South AfricaZambia	5	2
41 / 42	452	Sydney Rosen	South Africa	-25.7463	28.1876	32.1876	USA	38.8921	-77.0241		Ketlhapile M	South Africa	2	-25.7463	28.1876			57	4		South AfricaSouth Africa	84	6
41 / 42	453	Sydney Rosen	South Africa	-25.7463	28.1876	32.1876	USA	38.8921	-77.0241		Larson B	USA	4	38.8921	-77.0241			57	11		South AfricaUSA	53	5
41 / 42	454	Sydney Rosen	South Africa	-25.7463	28.1876	32.1876	USA	38.8921	-77.0241		Long L	South Africa	2	-25.7463	28.1876			57	5		South AfricaSouth Africa	84	6
41 / 42	455	Sydney Rosen	South Africa	-25.7463	28.1876	32.1876	USA	38.8921	-77.0241		Marseille E	USA	4	38.8921	-77.0241			57	1		South AfricaUSA	53	5
41 / 42	456	Sydney Rosen	South Africa	-25.7463	28.1876	32.1876	USA	38.8921	-77.0241		Meyer-Rath G	USA	4	38.8921	-77.0241			57	3		South AfricaUSA	53	5
41 / 42	457	Sydney Rosen	South Africa	-25.7463	28.1876	32.1876	USA	38.8921	-77.0241		Miller CM	USA	4	38.8921	-77.0241			57	1		South AfricaUSA	53	5
41 / 42	458	Sydney Rosen	South Africa	-25.7463	28.1876	32.1876	USA	38.8921	-77.0241		Sanne I	South Africa	2	-25.7463	28.1876			57	2		South AfricaSouth Africa	84	6
41 / 42	459	Sydney Rosen	South Africa	-25.7463	28.1876	32.1876	USA	38.8921	-77.0241		Schnippel K	South Africa	2	-25.7463	28.1876			57	3	x	South AfricaSouth Africa	84	6
41 / 42	460	Sydney Rosen	South Africa	-25.7463	28.1876	32.1876	USA	38.8921	-77.0241		Scott CA	Zambia	3	15.4145	28.2809	USA		57	3		South AfricaZambia	5	2
41 / 42	461	Sydney Rosen	South Africa	-25.7463	28.1876	32.1876	USA	38.8921	-77.0241		Simon JL	USA	4	38.8921	-77.0241			57	3		South AfricaUSA	53	5
41 / 42	462	Sydney Rosen	South Africa	-25.7463	28.1876	32.1876	USA	38.8921	-77.0241		Thirumurthy H	USA	4	38.8921	-77.0241			57	1		South AfricaUSA	53	5
41 / 42	463	Sydney Rosen	South Africa	-25.7463	28.1876	32.1876	USA	38.8921	-77.0241		Vincent JR	USA	4	38.8921	-77.0241			57	1		South AfricaUSA	53	5
63 / 66	464	Pascalina Chanda	Zambia	15.4145	28.2809	32.2809	0				Barnes KI	South Africa	3	-25.7463	28.1876			11	1		ZambiaSouth Africa	2	1
63 / 66	465	Pascalina Chanda	Zambia	15.4145	28.2809	32.2809	0				Castillo-Riquelme M	South Africa	3	-25.7463	28.1876			11	1		ZambiaSouth Africa	2	1
63 / 66	466	Pascalina Chanda	Zambia	15.4145	28.2809	32.2809	0				Hamainza B	Zambia	2	15.4145	28.2809			11	3		ZambiaZambia	6	2
63 / 66	467	Pascalina Chanda	Zambia	15.4145	28.2809	32.2809	0				Hamer DH	USA	4	38.8921	-77.0241			11	1		ZambiaUSA	1	1
63 / 66	468	Pascalina Chanda	Zambia	15.4145	28.2809	32.2809	0				Hawela M	Zambia	2	15.4145	28.2809			11	1		ZambiaZambia	6	2
63 / 66	469	Pascalina Chanda	Zambia	15.4145	28.2809	32.2809	0				Masiye F	Zambia	2	15.4145	28.2809			11	1		ZambiaZambia	6	2
63 / 66	470	Pascalina Chanda	Zambia	15.4145	28.2809	32.2809	0				Pearce RJ	the UK	4	51.5004	-0.1262			11	1		Zambiathe UK	1	1
63 / 66	471	Pascalina Chanda	Zambia	15.4145	28.2809	32.2809	0				Sipilanyambe N	Zambia	2	15.4145	28.2809			11	1		ZambiaZambia	6	2
63 / 66	472	Pascalina Chanda	Zambia	15.4145	28.2809	32.2809	0				Zurovac D	Kenya	3	-1.2762	36.7965			11	1	x	ZambiaKenya	1	1

## Sheet: total per co-author country
Count of Co-author Country		Column Labels
Row Labels		Australia	Belgium	Benin	Botswana	Botswana	Brazil	Canada	Congo	Denmark	Ethiopia	France	Gabon	Gambia	Germany	Ghana	Ireland	Kenya	Lesotho	Madagascar	Malawi	Mozambique	Netherlands	Nigeria	Norway	Pakistan	Saudi Arabia	South Africa	South Sudan	Spain	Sudan	Swaziland	Sweden	Switzerland	Switzerland	Tanzania	The UK	Uganda	USA	Zambia	Grand Total
Amani T Mori	Norway /Tanzania /																								1											3					4	2
Angela Oloo Akumu	Kenya /																	2																							2	1
Anthony K. Mbonye	Canada /Denmark /The UK /Uganda /USA /							2		2																											2	10	3		19	5
Asayehegn Tekeste	Ethiopia /										1																														1	1
Asfaw Demissie Bikilla	Norway /																								1																1	1
Benjamin Uzochukwu	Nigeria /The UK /																							17													4				21	2
Bolajoko O. Olusanya	Benin /Germany /Nigeria /South Africa /The UK /USA /			1											1									15				1									3		7		28	6
Charles Ezenduka	Netherlands /Nigeria /																						1	4																	5	2
Charlotte M Zikusooka	South Africa /Uganda /USA /																											1										3	1		5	3
Dejan Zurovac	France /Kenya /The UK /Uganda /USA /Zambia /											1						14																			1	2	3	1	22	6
Dylo F Pemba	Malawi /																				2																				2	1
Evelyn K. Ansah	Ghana /Malawi /Netherlands /The UK /															2					1		1														5				9	4
Everisto Opondo	Kenya /																	2																							2	1
Guillaume Jouquet	Belgium /Lesotho /South Africa /Swaziland /Switzerland /		1																1									1				1		1							5	5
Hailemariam Lemma	Ethiopia /Sweden /										2																						4								6	2
Heidi Albert	Pakistan /South Africa /Switzerland /Uganda /USA /																									1		2						3				4	1		11	5
Ismail Ayinla Suleiman	Nigeria /																							2																	2	1
Jan H Kolaczinski	Australia /Ethiopia /France /Kenya /Pakistan /South Sudan /The UK /Uganda /	1									1	1						1								1			4								3	5			17	8
Joanna RM Armstrong Schellenberg	Brazil /Gambia /Spain /Switzerland /Switzerland /Tanzania /The UK /USA /						1							3																1				5	1	8	9		1		29	8
Junior R Matangila	Belgium /Congo /		1						1																																2	2
Justice Nonvignon	Congo /Ghana /Nigeria /USA /								1							7								1															1		10	4
Kathryn Schnippel	South Africa /USA /																											4											3		7	2
Kevin Duffy	Germany /The UK /Uganda /USA /														1																						1	1	4		7	4
Kingsley Osei-Kwakye	Gabon /Germany /Ghana /The UK /												1		1	5																					1				8	4
Lucy W Kivuti-Bitok	Kenya /																	3																							3	1
Meera K Chhagana	Norway /South Africa /Switzerland /USA /																								1			2						1					2		6	4
Motasim Badri	Saudi Arabia /South Africa /The UK /USA /																										5	25									3		3		36	4
Nazarius M Tumwesigye	Australia /Ireland /Switzerland /The UK /Uganda /USA /	2															1																	1			1	18	2		25	6
Núria Díez-Padrisa	Mozambique /Spain /USA /																					2								3									1		6	3
Obinna Ikechukwu Ekwunife	Nigeria /																							11																	11	1
Obinna Onwujekwe	Nigeria /South Africa /Sudan /The UK /USA /																							20				1			1						7		2		31	5
Pascalina Chanda	Kenya /South Africa /The UK /USA /Zambia /																	1										2									1		1	4	9	5
Paul K. Drain	Canada /Madagascar /South Africa /Swaziland /USA /							1												1								3				1							16		22	5
PM Nthumba	Kenya /Spain /Switzerland /USA /																	6												1				1					4		12	4
Rory Leisegang	South Africa /USA /																											5											1		6	2
Rosemary Ogu	Nigeria /																							4																	4	1
Stephen Thompson	Australia /South Africa /The UK /USA /	2																										1									21		8		32	4
Sydney Rosen	France /South Africa /USA /Zambia /											1																6											11	3	21	4
Taraz Samandari	Botswana /Botswana /South Africa /The UK /USA /				2	1																						1									1		17		22	5
Yibeltal A Kifle	Ethiopia /										1																														1	1
Grand Total		5	2	1	2	1	1	3	2	2	5	3	1	3	3	14	1	29	1	1	3	2	2	74	3	2	5	55	4	5	1	2	4	12	1	11	63	43	92	8	472	39
Row Labels	Grand Total
Benin	1
Botswana	1
Brazil	1
Gabon	1
Ireland	1
Lesotho	1
Madagascar	1
Sudan	1
Switzerland	1
Belgium	2
Botswana	2
Congo	2
Denmark	2
Mozambique	2
Netherlands	2
Pakistan	2
Swaziland	2
Canada	3
France	3
Gambia	3
Germany	3
Malawi	3
Norway	3
South Sudan	4
Sweden	4
Australia	5
Ethiopia	5
Saudi Arabia	5
Spain	5
Zambia	8
Tanzania	11
Switzerland	12
Ghana	14
Kenya	29
Uganda	43
South Africa	55
The UK	63
Nigeria	74
USA	92
Grand Total	472
	39

## Sheet: herfindal index
Count of Co-author Country	Column Labels
Row Labels	Australia	Belgium	Benin	Botswana	Botswana	Brazil	Canada	Congo	Denmark	Ethiopia	France	Gabon	Gambia	Germany	Ghana	Ireland	Kenya	Lesotho	Madagascar	Malawi	Mozambique	Netherlands	Nigeria	Norway	Pakistan	Saudi Arabia	South Africa	South Sudan	Spain	Sudan	Swaziland	Sweden	Switzerland	Switzerland	Tanzania	The UK	Uganda	USA	Zambia	Herfindal Index
Amani T Mori	0	0	0	0	0	0	0	0	0	0	0	0	0	0	0	0	0	0	0	0	0	0	0	0.0625	0	0	0	0	0	0	0	0	0	0	0.5625	0	0	0	0	0.625
Angela Oloo Akumu	0	0	0	0	0	0	0	0	0	0	0	0	0	0	0	0	1	0	0	0	0	0	0	0	0	0	0	0	0	0	0	0	0	0	0	0	0	0	0	1
Anthony K. Mbonye	0	0	0	0	0	0	0.0110803	0	0.0110803	0	0	0	0	0	0	0	0	0	0	0	0	0	0	0	0	0	0	0	0	0	0	0	0	0	0	0.0110803	0.277008	0.0249307	0	0.33518
Asayehegn Tekeste	0	0	0	0	0	0	0	0	0	1	0	0	0	0	0	0	0	0	0	0	0	0	0	0	0	0	0	0	0	0	0	0	0	0	0	0	0	0	0	1
Asfaw Demissie Bikilla	0	0	0	0	0	0	0	0	0	0	0	0	0	0	0	0	0	0	0	0	0	0	0	1	0	0	0	0	0	0	0	0	0	0	0	0	0	0	0	1
Benjamin Uzochukwu	0	0	0	0	0	0	0	0	0	0	0	0	0	0	0	0	0	0	0	0	0	0	0.655329	0	0	0	0	0	0	0	0	0	0	0	0	0.0362812	0	0	0	0.69161
Bolajoko O. Olusanya	0	0	0.00127551	0	0	0	0	0	0	0	0	0	0	0.00127551	0	0	0	0	0	0	0	0	0.28699	0	0	0	0.00127551	0	0	0	0	0	0	0	0	0.0114796	0	0.0625	0	0.364796
Charles Ezenduka	0	0	0	0	0	0	0	0	0	0	0	0	0	0	0	0	0	0	0	0	0	0.04	0.64	0	0	0	0	0	0	0	0	0	0	0	0	0	0	0	0	0.68
Charlotte M Zikusooka	0	0	0	0	0	0	0	0	0	0	0	0	0	0	0	0	0	0	0	0	0	0	0	0	0	0	0.04	0	0	0	0	0	0	0	0	0	0.36	0.04	0	0.44
Dejan Zurovac	0	0	0	0	0	0	0	0	0	0	0.00206612	0	0	0	0	0	0.404959	0	0	0	0	0	0	0	0	0	0	0	0	0	0	0	0	0	0	0.00206612	0.00826446	0.018595	0.00206612	0.438017
Dylo F Pemba	0	0	0	0	0	0	0	0	0	0	0	0	0	0	0	0	0	0	0	1	0	0	0	0	0	0	0	0	0	0	0	0	0	0	0	0	0	0	0	1
Evelyn K. Ansah	0	0	0	0	0	0	0	0	0	0	0	0	0	0	0.0493827	0	0	0	0	0.0123457	0	0.0123457	0	0	0	0	0	0	0	0	0	0	0	0	0	0.308642	0	0	0	0.382716
Everisto Opondo	0	0	0	0	0	0	0	0	0	0	0	0	0	0	0	0	1	0	0	0	0	0	0	0	0	0	0	0	0	0	0	0	0	0	0	0	0	0	0	1
Guillaume Jouquet	0	0.04	0	0	0	0	0	0	0	0	0	0	0	0	0	0	0	0.04	0	0	0	0	0	0	0	0	0.04	0	0	0	0.04	0	0.04	0	0	0	0	0	0	0.2
Hailemariam Lemma	0	0	0	0	0	0	0	0	0	0.111111	0	0	0	0	0	0	0	0	0	0	0	0	0	0	0	0	0	0	0	0	0	0.444444	0	0	0	0	0	0	0	0.555556
Heidi Albert	0	0	0	0	0	0	0	0	0	0	0	0	0	0	0	0	0	0	0	0	0	0	0	0	0.00826446	0	0.0330579	0	0	0	0	0	0.0743802	0	0	0	0.132231	0.00826446	0	0.256198
Ismail Ayinla Suleiman	0	0	0	0	0	0	0	0	0	0	0	0	0	0	0	0	0	0	0	0	0	0	1	0	0	0	0	0	0	0	0	0	0	0	0	0	0	0	0	1
Jan H Kolaczinski	0.00346021	0	0	0	0	0	0	0	0	0.00346021	0.00346021	0	0	0	0	0	0.00346021	0	0	0	0	0	0	0	0.00346021	0	0	0.0553633	0	0	0	0	0	0	0	0.0311419	0.0865052	0	0	0.190311
Joanna RM Armstrong Schellenberg	0	0	0	0	0	0.00118906	0	0	0	0	0	0	0.0107015	0	0	0	0	0	0	0	0	0	0	0	0	0	0	0	0.00118906	0	0	0	0.0297265	0.00118906	0.0760999	0.0963139	0	0.00118906	0	0.217598
Junior R Matangila	0	0.25	0	0	0	0	0	0.25	0	0	0	0	0	0	0	0	0	0	0	0	0	0	0	0	0	0	0	0	0	0	0	0	0	0	0	0	0	0	0	0.5
Justice Nonvignon	0	0	0	0	0	0	0	0.01	0	0	0	0	0	0	0.49	0	0	0	0	0	0	0	0.01	0	0	0	0	0	0	0	0	0	0	0	0	0	0	0.01	0	0.52
Kathryn Schnippel	0	0	0	0	0	0	0	0	0	0	0	0	0	0	0	0	0	0	0	0	0	0	0	0	0	0	0.326531	0	0	0	0	0	0	0	0	0	0	0.183673	0	0.510204
Kevin Duffy	0	0	0	0	0	0	0	0	0	0	0	0	0	0.0204082	0	0	0	0	0	0	0	0	0	0	0	0	0	0	0	0	0	0	0	0	0	0.0204082	0.0204082	0.326531	0	0.387755
Kingsley Osei-Kwakye	0	0	0	0	0	0	0	0	0	0	0	0.015625	0	0.015625	0.390625	0	0	0	0	0	0	0	0	0	0	0	0	0	0	0	0	0	0	0	0	0.015625	0	0	0	0.4375
Lucy W Kivuti-Bitok	0	0	0	0	0	0	0	0	0	0	0	0	0	0	0	0	1	0	0	0	0	0	0	0	0	0	0	0	0	0	0	0	0	0	0	0	0	0	0	1
Meera K Chhagana	0	0	0	0	0	0	0	0	0	0	0	0	0	0	0	0	0	0	0	0	0	0	0	0.0277778	0	0	0.111111	0	0	0	0	0	0.0277778	0	0	0	0	0.111111	0	0.277778
Motasim Badri	0	0	0	0	0	0	0	0	0	0	0	0	0	0	0	0	0	0	0	0	0	0	0	0	0	0.0192901	0.482253	0	0	0	0	0	0	0	0	0.00694444	0	0.00694444	0	0.515432
Nazarius M Tumwesigye	0.0064	0	0	0	0	0	0	0	0	0	0	0	0	0	0	0.0016	0	0	0	0	0	0	0	0	0	0	0	0	0	0	0	0	0.0016	0	0	0.0016	0.5184	0.0064	0	0.536
Núria Díez-Padrisa	0	0	0	0	0	0	0	0	0	0	0	0	0	0	0	0	0	0	0	0	0.111111	0	0	0	0	0	0	0	0.25	0	0	0	0	0	0	0	0	0.0277778	0	0.388889
Obinna Ikechukwu Ekwunife	0	0	0	0	0	0	0	0	0	0	0	0	0	0	0	0	0	0	0	0	0	0	1	0	0	0	0	0	0	0	0	0	0	0	0	0	0	0	0	1
Obinna Onwujekwe	0	0	0	0	0	0	0	0	0	0	0	0	0	0	0	0	0	0	0	0	0	0	0.416233	0	0	0	0.00104058	0	0	0.00104058	0	0	0	0	0	0.0509886	0	0.00416233	0	0.473465
Pascalina Chanda	0	0	0	0	0	0	0	0	0	0	0	0	0	0	0	0	0.0123457	0	0	0	0	0	0	0	0	0	0.0493827	0	0	0	0	0	0	0	0	0.0123457	0	0.0123457	0.197531	0.283951
Paul K. Drain	0	0	0	0	0	0	0.00206612	0	0	0	0	0	0	0	0	0	0	0	0.00206612	0	0	0	0	0	0	0	0.018595	0	0	0	0.00206612	0	0	0	0	0	0	0.528926	0	0.553719
PM Nthumba	0	0	0	0	0	0	0	0	0	0	0	0	0	0	0	0	0.25	0	0	0	0	0	0	0	0	0	0	0	0.00694444	0	0	0	0.00694444	0	0	0	0	0.111111	0	0.375
Rory Leisegang	0	0	0	0	0	0	0	0	0	0	0	0	0	0	0	0	0	0	0	0	0	0	0	0	0	0	0.694444	0	0	0	0	0	0	0	0	0	0	0.0277778	0	0.722222
Rosemary Ogu	0	0	0	0	0	0	0	0	0	0	0	0	0	0	0	0	0	0	0	0	0	0	1	0	0	0	0	0	0	0	0	0	0	0	0	0	0	0	0	1
Stephen Thompson	0.00390625	0	0	0	0	0	0	0	0	0	0	0	0	0	0	0	0	0	0	0	0	0	0	0	0	0	0.000976562	0	0	0	0	0	0	0	0	0.430664	0	0.0625	0	0.498047
Sydney Rosen	0	0	0	0	0	0	0	0	0	0	0.00226757	0	0	0	0	0	0	0	0	0	0	0	0	0	0	0	0.0816327	0	0	0	0	0	0	0	0	0	0	0.274376	0.0204082	0.378685
Taraz Samandari	0	0	0	0.00826446	0.00206612	0	0	0	0	0	0	0	0	0	0	0	0	0	0	0	0	0	0	0	0	0	0.00206612	0	0	0	0	0	0	0	0	0.00206612	0	0.597107	0	0.61157
Yibeltal A Kifle	0	0	0	0	0	0	0	0	0	1	0	0	0	0	0	0	0	0	0	0	0	0	0	0	0	0	0	0	0	0	0	0	0	0	0	0	0	0	0	1
